# Supplementary material
Source: publisher figshare collection journal article supplement (https://acs.figshare.com/ndownloader/files/18517328)
Supplement: Supplementary file 1 [file 18517328]

## Sheet: title
Exploring Chemical Biosynthetic Design Space with Transform-MinER Jonathan D. Tyzacka*, Antonio J. M. Ribeiroa, Neera Borkakotia, Janet M. Thorntona a European Molecular Biology Laboratory, European Bioinformatics Institute (EMBL-EBI), Wellcome Genome Campus, CB10 1SD, United Kingdom * Correspondence: tyzack@ebi.ac.uk Supplementary Information - Test Sets

## Sheet: denovo
ref	doi	ec	reactantSmiles	productSmiles	inSubsetCompetitorAnalysis
rxn0001	10.1002/cbic.201500493	1.11.2.1	c1ccc2ccccc2c1	Oc1cccc2ccccc12	1
rxn0002	10.1002/bit.21643; 10.1002/adsc.200700061	3.5.1.49	N#CCO	O=C(O)CO	1
rxn0003	10.1093/molbev/msu271	1.2.1.41	CC(=O)NC(CCC(=O)OP(=O)(O)O)C(=O)O	CC(=O)NC(CCC=O)C(=O)O	1
rxn0004	10.1093/proeng/gzg013	3.1.8.1	CCOP(=O)(OCC)Oc1cc2oc(=O)ccc2cc1Cl	O=c1ccc2cc(Cl)c(O)cc2o1	0
rxn0005	10.1093/proeng/gzg013	3.1.8.1	COP(=O)(OC)Oc1ccc([N+](=O)O)cc1	COP(=O)(O)OC	1
rxn0006	10.1093/proeng/gzg013	3.1.8.1	COP(=S)(OC)Oc1ccc([N+](=O)O)cc1	COP(O)(=S)OC	0
rxn0007	10.1093/proeng/gzg013	3.1.8.1	CCOP(=O)(OCC)SCCSCC	CCSCCO	0
rxn0008	10.1021/bi980294p	1.1.1.50	C[C@]12CC[C@H]3[C@@H](CCC4=CC(=O)CC[C@@]43C)[C@@H]1CC[C@@H]2O	C[C@]12CC[C@H]3[C@@H](CC[C@@H]4CC(=O)CC[C@]34C)[C@@H]1CC[C@@H]2O	0
rxn0009	10.1021/bi980294p	1.1.1.50	CC(=O)[C@H]1CC[C@H]2[C@@H]3CCC4=CC(=O)CC[C@]4(C)[C@H]3CC[C@]12C	CC(=O)[C@H]1CC[C@H]2[C@@H]3CC[C@@H]4CC(=O)CC[C@]4(C)[C@H]3CC[C@]12C	0
rxn0010	10.1073/pnas.160255397	5.3.1.16	O=C(O)c1ccccc1NC1OC(COP(=O)(O)O)C(O)C1O	O=C(O)c1ccccc1NCC(=O)C(O)C(O)COP(=O)(O)O	1
rxn0011	10.1073/pnas.0403045101	2.5.1.18	NC(CCC(=O)NC(CSC(=O)c1ccccc1)C(=O)NCC(=O)O)C(=O)O	NC(CCC(=O)NC(CS)C(=O)NCC(=O)O)C(=O)O	1
rxn0012	10.1021/bi0014305	2.5.1.1	CC(C)=CCOP(=O)(O)OP(=O)(O)O	CC(C)=CCC/C(C)=C/COP(=O)(O)OP(=O)(O)O	0
rxn0013	10.1126/science.3201242	1.1.1.27	O=C(O)CC(O)C(=O)O	O=C(O)CC(=O)C(=O)O	0
rxn0014	10.1074/jbc.271.29.17226	1.1.1.205	CC(O)C(=O)O	CC(=O)C(=O)O	0
rxn0015	10.1021/bi001209s	4.1.1.17	NCCC[C@H](N)C(=O)O	Cc1ncc(COP(=O)(O)O)c(CN)c1O	1
rxn0016	10.1038/ng1482	4.2.1.1	CC(=O)Oc1ccc2ccccc2c1	Oc1ccc2ccccc2c1	1
rxn0017	10.1038/ng1482	3.1.1.2	O=C1CCCS1	O=C(O)CCCS	1
rxn0018	10.1038/ng1482	3.1.1.2	CCCCCCCC(=O)Oc1ccc2ccccc2c1	Oc1ccc2ccccc2c1	0
rxn0019	10.1038/ng1482	3.1.1.2	CC(=O)Oc1ccc2oc(=O)ccc2c1	O=c1ccc2cc(O)ccc2o1	0
rxn0020	10.1038/ng1482	3.1.1.2	CCOP(=O)(OCC)Oc1ccc2cc(C#N)c(=O)oc2c1	N#Cc1cc2ccc(O)cc2oc1=O	0
rxn0021	10.1021/ja405911h	3.1.1.-	CCOP(=O)(OCC)Oc1ccc([N+](=O)O)cc1	CCOP(=O)(O)OCC	0
rxn0022	10.1038/nchembio.510	3.1.1.2	CP(=O)(F)OC1CCCCC1	OC1CCCCC1	0
rxn0023	10.1038/nchembio.1276	4.1.1.48	COc1ccc2cc(C(O)CC(C)=O)ccc2c1	COc1ccc2cc(C=O)ccc2c1	0
rxn0024	10.1093/protein/gzh007	3.1.1.-	CC(=O)Oc1ccc([N+](=O)O)cc1	O=[N+](O)c1ccc(O)cc1	0
rxn0025	10.1016/j.jbiotec.2011.11.017	2.2.1.1	CCC=O	CCC(O)C(=O)CO	0
rxn0026	10.1038/nature04607	4.2.3.56	CC(C)=CCC/C(C)=C/CC/C(C)=C/COP(=O)(O)OP(=O)(O)O	C=CC(=C)CC/C=C(\C)CCC=C(C)C	0
rxn0027	10.1038/nature04607	4.2.3.56	CC(C)=CCC/C(C)=C/CC/C(C)=C/COP(=O)(O)OP(=O)(O)O	C=C1CCCC2(C)CCC(C(C)C)=CC12	0
rxn0028	10.1038/nature04607	4.2.3.56	CC(C)=CCC/C(C)=C/CC/C(C)=C\COP(=O)(O)OP(=O)(O)O	C=C1/C=C/C(C)(C)CCC/C(C)=C\CC1	0
rxn0029	10.1038/nature04607	4.2.3.56	CC(C)=CCC/C(C)=C/CC/C(C)=C\COP(=O)(O)OP(=O)(O)O	C=C1C2CCC3C2C(C)(C)CCCC13C	0
rxn0030	10.1038/nature04607	4.2.3.56	CC(C)=CCC/C(C)=C/CC/C(C)=C\COP(=O)(O)OP(=O)(O)O	CC1=CCC2C3C1C2(C)CCCC3(C)C	0
rxn0031	10.1038/nature04607	4.2.3.56	CC(C)=CCC/C(C)=C/CC/C(C)=C\COP(=O)(O)OP(=O)(O)O	CC1=CCC2C3C(C(C)C)CC[C@]2(C)C13	0
rxn0032	10.1038/nature04607	4.2.3.56	CC(C)=CCC/C(C)=C/CC/C(C)=C\COP(=O)(O)OP(=O)(O)O	CC(C)=CC/C=C(\C)C1CC=C(C)CC1	0
rxn0033	10.1038/nature04607	4.2.3.56	CC(C)=CCC/C(C)=C/CC/C(C)=C/COP(=O)(O)OP(=O)(O)O	C=C/C(C)=C\C/C=C(\C)CCC=C(C)C	0
rxn0034	10.1021/bi001458g	1.1.1.42	CC(C)C(C(=O)O)C(O)C(=O)O	CC(C)C(C(=O)O)C(=O)C(=O)O	0
rxn0035	10.1006/jmbi.1998.2262	3.5.2.6	CO/N=C(/C(=O)NC1C(=O)N2C(C(=O)O)=C(COC(C)=O)CSC12)c1csc(N)n1	CO/N=C(/C(=O)NC(C(=O)O)C1NC(C(=O)O)=C(COC(C)=O)CS1)c1csc(N)n1	1
rxn0036	10.1093/nar/gkp400	2.7.1.145	Cc1cn(C2CCC(CO)O2)c(=O)[nH]c1=O	Cc1cn(C2CCC(COP(=O)(O)O)O2)c(=O)[nH]c1=O	1
rxn0037	10.1002/cbic.201100579	3.8.1.5	ClCC(Cl)CCl	OCC(Cl)CCl	0
rxn0038	10.1002/ps.1014	2.3.1.-	O=C(O)CNCP(=O)(O)O	CC(=O)N(CC(=O)O)CP(=O)(O)O	0
rxn0039	10.1002/ps.1014	2.3.1.-	N[C@@H](CC(=O)O)C(=O)O	CC(=O)N[C@@H](CC(=O)O)C(=O)O	1
rxn0040	10.1002/ps.1014	2.3.1.-	N[C@@H](CO)C(=O)O	CC(=O)N[C@@H](CO)C(=O)O	0
rxn0041	10.1016/S1074-5521(00)00015-6	3.1.1.3	CCCCCCCC[C@H](C)C(=O)Oc1ccc([N+](=O)O)cc1	CCCCCCCC[C@H](C)C(=O)O	0
rxn0042	10.1016/j.bbapap.2013.01.005	4.1.1.48	O=[N+](O)c1ccc2oncc2c1	N#Cc1cc([N+](=O)O)ccc1O	0
rxn0043	10.1016/j.chembiol.2004.10.012	3.1.1.2	COC(=O)[C@H](C)CBr	C[C@H](CBr)C(=O)O	0
rxn0044	10.1016/j.chembiol.2012.01.017	3.1.1.2;3.1.8.1	C[C@H](O[P@](C)(=O)F)C(C)(C)C	C[P@@](=O)(O)F	0
rxn0045	10.1016/j.chembiol.2012.01.017	3.1.1.2;3.1.8.1	C[C@@H](O[P@](C)(=O)F)C(C)(C)C	C[P@@](=O)(O)F	0
rxn0046	10.1016/j.chembiol.2012.01.017	3.1.1.2;3.1.8.1	C[P@@](=O)(F)OC1CCCCC1	C[P@@](=O)(O)F	0
rxn0047	10.1016/j.chembiol.2012.01.017	3.1.1.2;3.1.8.1	CC(C)O[P@](C)(=O)F	C[P@@](=O)(O)F	0
rxn0048	10.1016/j.chembiol.2012.01.017	3.1.1.2;3.1.8.1	CCO[P@@](=O)(C#N)N(C)C	CN(C)[P@@](=O)(O)C#N	0
rxn0049	10.1016/j.chembiol.2012.01.017	3.1.1.2;3.1.8.1	Cc1c(C#N)c(=O)oc2cc(O[P@@](C)(=O)OC3CCCCC3)ccc12	C[P@](=O)(O)OC1CCCCC1	0
rxn0050	10.1016/j.chembiol.2012.01.017	3.1.1.2;3.1.8.1	Cc1c(C#N)c(=O)oc2cc(O[P@](C)(=O)OC3CCCCC3)ccc12	C[P@](=O)(O)OC1CCCCC1	0
rxn0051	10.1016/j.chembiol.2012.01.017	3.1.1.2;3.1.8.1	CCO[P@](C)(=O)SCCN(C(C)C)C(C)C	CC(C)N(CCS[P@@](C)(=O)O)C(C)C	0
rxn0052	10.1016/j.jbiotec.2007.07.949	2.2.1.1	O=C(O)C(=O)CO	O=C(CO)[C@@H](O)CO	0
rxn0053	10.1016/j.jmb.2011.06.037	3.1.1.2;3.1.8.1;3.1.1.81	CCCCSC1CCC(=O)O1	CCCCSC(O)CCC(=O)O	0
rxn0054	10.1016/j.jmb.2011.06.037	3.1.1.2;3.1.8.1	CC(=O)Oc1cccc([N+](=O)O)c1	O=[N+](O)c1cccc(O)c1	0
rxn0055	10.1016/j.jmb.2011.06.037	3.1.1.2;3.1.8.1	CC(=O)Oc1ccc(C(C)=O)cc1	CC(=O)c1ccc(O)cc1	0
rxn0056	10.1016/j.jmb.2011.06.037	3.1.1.2;3.1.8.1	CC(C)OP(C)(=O)Oc1ccc([N+](=O)O)cc1	CC(C)OP(C)(=O)O	0
rxn0057	10.1016/j.jmb.2011.06.037	2.8.2.1	O=[N+](O)c1ccc(O)cc1	O=[N+](O)c1ccc(OS(=O)(=O)O)cc1	0
rxn0058	10.1016/j.jmb.2011.06.037	2.8.2.1	Cc1c(C#N)c(=O)oc2cc(O)ccc12	Cc1c(C#N)c(=O)oc2cc(OS(=O)(=O)O)ccc12	1
rxn0059	10.1016/j.jmb.2011.06.037	2.8.2.1	CC(C)(c1ccc(O)cc1)c1ccc(O)cc1	CC(C)(c1ccc(O)cc1)c1ccc(OS(=O)(=O)O)cc1	0
rxn0060	10.1016/j.jmb.2011.06.037	2.8.2.1	N[C@@H](Cc1cc(I)c(Oc2cc(I)c(O)c(I)c2)c(I)c1)C(=O)O	N[C@@H](Cc1cc(I)c(Oc2cc(I)c(OS(=O)(=O)O)c(I)c2)c(I)c1)C(=O)O	0
rxn0061	10.1021/ja2089348	1.14.19.9	NCCc1c[nH]c2ccccc12	NCCc1c[nH]c2c(Cl)cccc12	1
rxn0062	10.1021/ja4051235	1.4.3.4	C[C@H](N)c1ccccc1	CC(=O)c1ccccc1	0
rxn0063	10.1021/ja4051235	1.4.3.4	NC(c1ccccc1)c1ccccc1	O=C(c1ccccc1)c1ccccc1	0
rxn0064	10.1021/ja4051235	1.4.3.4	N[C@@H](c1ccccc1)c1ccc(Cl)cc1	O=C(c1ccccc1)c1ccc(Cl)cc1	0
rxn0065	10.1021/ja4051235	1.4.3.4	N[C@H](c1ccccc1)c1ccc(Cl)cc1	O=C(c1ccccc1)c1ccc(Cl)cc1	0
rxn0066	10.1021/ja4051235	1.4.3.4	c1ccc([C@H]2NCCc3ccccc32)cc1	c1ccc(C2=NCCc3ccccc32)cc1	0
rxn0067	10.1021/ja4051235	1.4.3.4	NC(c1ccccc1)c1ccc(Cl)cc1	O=C(c1ccccc1)c1ccc(Cl)cc1	0
rxn0068	10.1021/ja4051235	1.4.3.4	c1ccc2c(CCN3CCCC3)c[nH]c2c1	c1ccc2c3c([nH]c2c1)[C@H]1CCCN1CC3	0
rxn0069	10.1021/jp4018019	1.14.13.22	O=C1CCC(O)CC1	O=C1CC[C@@H](O)CCO1	0
rxn0070	10.1021/jp4018019	1.14.13.22	O=C1CCC(O)CC1	O=C1CC[C@H](O)CCO1	0
rxn0071	10.1074/jbc.274.4.2344	2.6.1.1	CC(C)[C@H](N)C(=O)O	CC(C)C(=O)C(=O)O	0
rxn0072	10.1074/jbc.274.4.2344	2.6.1.1	CC[C@H](C)[C@H](N)C(=O)O	CC[C@H](C)C(=O)C(=O)O	0
rxn0073	10.1074/jbc.274.4.2344	2.6.1.1	CC(C)C[C@H](N)C(=O)O	CC(C)CC(=O)C(=O)O	0
rxn0074	10.1074/jbc.274.4.2344	2.6.1.1	CC(C)C(=O)C(=O)O	CC(C)[C@@H](N)C(=O)O	0
rxn0075	10.1074/jbc.274.4.2344	2.6.1.1	CC[C@H](C)C(=O)C(=O)O	CC[C@H](C)[C@H](N)C(=O)O	0
rxn0076	10.1074/jbc.274.4.2344	2.6.1.1	CC(C)CC(=O)C(=O)O	CC(C)C[C@H](N)C(=O)O	0
rxn0077	10.1074/jbc.274.4.2344	2.6.1.1	N[C@@H](CC(=O)O)C(=O)O	O=C(O)CC(=O)C(=O)O	0
rxn0078	10.1074/jbc.274.4.2344	2.6.1.1	N[C@@H](CCC(=O)O)C(=O)O	O=C(O)CCC(=O)C(=O)O	1
rxn0079	10.1074/jbc.274.4.2344	2.6.1.1	N[C@@H](CC(=O)O)C(=O)O	N[C@@H](CC(=O)O)C(=O)O	0
rxn0080	10.1074/jbc.274.4.2344	2.6.1.1	N[C@@H](CC(=O)O)C(=O)O	N[C@@H](CCC(=O)O)C(=O)O	0
rxn0081	10.1074/jbc.M109.051631	1.4.3.19	CNCC(=O)O	O=CC(=O)O	0
rxn0082	10.1074/jbc.M109.051631	1.4.3.19	NCC(=O)O	O=CC(=O)O	0
rxn0083	10.1074/jbc.M109.051631	1.4.3.19	CCNCC(=O)O	O=CC(=O)O	0
rxn0084	10.1074/jbc.M109.051631	1.4.3.19	CCOC(=O)CN	CCOC(=O)C=O	0
rxn0085	10.1074/jbc.M109.051631	1.4.3.19	CSCC[C@@H](N)C(=O)O	CSCCC(=O)C(=O)O	0
rxn0086	10.1074/jbc.M109.051631	1.4.3.19	O=C(O)[C@H]1CCCN1	NCCCC(=O)C(=O)O	0
rxn0087	10.1074/jbc.M109.051631	1.4.3.19	C[C@@H](N)C(=O)O	CC(=O)C(=O)O	0
rxn0088	10.1074/jbc.M109.051631	1.4.3.19	CN[C@H](C)C(=O)O	CC(=O)C(=O)O	1
rxn0089	10.1074/jbc.M109.051631	1.4.3.19	O=C(O)[C@H]1CCCCN1	NCCCCC(=O)C(=O)O	0
rxn0090	10.1074/jbc.M109.051631	1.4.3.19	CC[C@@H](N)C(=O)O	CCC(=O)C(=O)O	0
rxn0091	10.1074/jbc.M109.051631	1.4.3.19	O=C(O)CNCP(=O)(O)O	NCP(=O)(O)O	0
rxn0092	10.1093/protein/14.4.261	1.1.3.9	OC[C@H]1O[C@H](OCC[C@H]2O[C@H](O)[C@H](O)[C@@H](O)[C@H]2OO[C@H]2O[C@H](CO)[C@H](O)[C@H](O)[C@H]2O)[C@H](O)[C@@H](O)[C@H]1O	O=C[C@H]1O[C@H](OCC[C@H]2O[C@H](O)[C@H](O)[C@@H](O)[C@H]2OO[C@H]2O[C@H](CO)[C@H](O)[C@H](O)[C@H]2O)[C@H](O)[C@@H](O)[C@H]1O	0
rxn0093	10.1093/protein/14.4.261	1.1.3.9	CO[C@H]1O[C@H](CO)[C@H](O)[C@H](O)[C@H]1O	CO[C@H]1O[C@H](C=O)[C@H](O)[C@H](O)[C@H]1O	1
rxn0094	10.1126/science.1188934	2.6.1.-	CC(=O)CC(=O)N1CCn2c(nnc2C(F)(F)F)C1	C[C@@H](N)CC(=O)N1CCn2c(nnc2C(F)(F)F)C1	0
rxn0095	10.1126/science.1188934	2.6.1.-	O=C(CC(=O)N1CCn2c(nnc2C(F)(F)F)C1)Cc1cc(F)c(F)cc1F	N[C@@H](CC(=O)N1CCn2c(nnc2C(F)(F)F)C1)Cc1cc(F)c(F)cc1F	0
rxn0096	10.1126/science.1188934	2.6.1.-	O=C(c1ccccc1)C(F)(F)F	N[C@@H](c1ccccc1)C(F)(F)F	0
rxn0097	10.1126/science.1188934	2.6.1.-	O=C(CCCCl)c1ccccc1F	O[C@H](CCCCl)c1ccccc1F	0
rxn0098	10.1021/bi201899b	4.1.2.14	O=C(O)C(=O)C[C@H](O)[C@H](O)COP(=O)(O)O	O=C[C@H](O)COP(=O)(O)O	0
rxn0099	10.1021/bi201899b	4.1.2.14	CCCC[C@@H](O)CC(=O)C(=O)O	CCCCC=O	0
rxn0100	10.1021/bi201899b	4.1.2.14	O=C(O)C(=O)C[C@H](O)c1ccccn1	O=Cc1ccccn1	0
rxn0101	10.1021/bi201899b	4.1.2.14	O=C[C@H](O)COP(=O)(O)O	O=C(O)C(=O)C[C@H](O)[C@H](O)COP(=O)(O)O	0
rxn0102	10.1021/bi201899b	4.1.2.14	O=C[C@H](O)CO	O=C(O)C(=O)C[C@H](O)[C@H](O)CO	0
rxn0103	10.1021/bi201899b	4.1.2.14	O=C[C@H](O)[C@H](O)CO	O=C(O)C(=O)C[C@H](O)[C@H](O)[C@H](O)CO	0
rxn0104	10.1021/bi201899b	4.1.2.14	O=C[C@@H](O)[C@@H](O)CO	O=C(O)C(=O)C[C@H](O)[C@@H](O)[C@@H](O)CO	0
rxn0105	10.1021/bi201899b	4.1.2.14	O=Cc1ccccn1	O=C(O)C(=O)C[C@H](O)c1ccccn1	0
rxn0106	10.1021/bi201899b	4.1.2.14	O=Cc1cccnc1	O=C(O)C(=O)C[C@H](O)c1cccnc1	1
rxn0107	10.1021/bi201899b	4.1.2.14	O=Cc1ccncc1	O=C(O)C(=O)C[C@H](O)c1ccncc1	0
rxn0108	10.1021/bi201899b	4.1.2.14	CCCCC=O	CCCC[C@@H](O)CC(=O)C(=O)O	0
rxn0109	10.1021/bi201899b	4.1.2.14	O=Cc1ccco1	O=C(O)C(=O)C[C@H](O)c1ccco1	0
rxn0110	10.1021/bi201899b	4.1.2.14	O=Cc1ccccc1	O=C(O)C(=O)C[C@H](O)c1ccccc1	0
rxn0111	10.1021/bi201899b	4.1.2.14	O=C(O)C(=O)C[C@@H](O)[C@H](O)COP(=O)(O)O	O=C[C@H](O)COP(=O)(O)O	0
rxn0112	10.1002/adsc.201000719	4.1.2.19	C[C@H](O)[C@H](O)[C@@H](O)C(=O)COP(=O)(O)O	C[C@H](O)C=O	0
rxn0113	10.1002/adsc.201000719	4.1.2.19	C[C@H](O)[C@H](O)[C@@H](O)C(=O)CO	C[C@H](O)C=O	0
rxn0114	10.1002/adsc.201000719	4.1.2.19	C[C@H](NC(=O)OCc1ccccc1)[C@H](O)[C@@H](O)C(=O)CO	C[C@@H](C=O)NC(=O)OCc1ccccc1	0
rxn0115	10.1002/adsc.201000719	4.1.2.19	C[C@H](NC(=O)OCc1ccccc1)[C@H](O)[C@@H](O)C(=O)COP(=O)(O)O	C[C@@H](C=O)NC(=O)OCc1ccccc1	0
rxn0116	10.1002/adsc.200900772	4.1.2.13	O=C(CO)[C@@H](O)[C@H](O)[C@H](O)[C@H](O)COP(=O)(O)O	O=C(CO)CO	0
rxn0117	10.1002/adsc.200900772	4.1.2.13	CC(=O)[C@@H](O)[C@H](O)[C@H](O)[C@H](O)COP(=O)(O)O	CC(=O)CO	0
rxn0118	10.1002/adsc.200900772	4.1.2.13	O=C(COP(=O)(O)O)[C@@H](O)[C@H](O)CO	O=CCO	0
rxn0119	10.1002/adsc.200900772	4.1.2.13	O=C[C@@H](O)[C@H](O)[C@H](O)[C@H](O)COP(=O)(O)O	O=CCO	0
rxn0120	10.1002/adsc.200900772	4.1.2.13	O=C(COP(=O)(O)O)[C@@H](O)[C@H](O)CCC[N+](=O)O	O=CCCC[N+](=O)O	0
rxn0121	10.1002/adsc.200900772	4.1.2.13	O=C(COP(=O)(O)O)[C@@H](O)CO	C=O	0
rxn0122	10.1002/adsc.200900772	4.1.2.13	O=C[C@H](O)COP(=O)(O)O	O=P(O)(O)OCC1OC(O)(COP(=O)(O)O)[C@@H](O)[C@@H]1O	0
rxn0123	10.1074/jbc.M803184200	2.2.1.2	O=P(O)(O)OC[C@H]1O[C@](O)(CO)[C@@H](O)[C@@H]1O	O=C(CO)CO	0
rxn0124	10.1074/jbc.M803184200	2.2.1.2	O=C(CO)[C@@H](O)[C@H](O)[C@H](O)[C@H](O)COP(=O)(O)O	O=P(O)(O)OC[C@H]1O[C@](O)(CO)[C@@H](O)[C@@H]1O	0
rxn0125	10.1002/cbic.200900720	2.2.1.2	O=C(CO)CO	OC[C@H]1O[C@](O)(CO)[C@@H](O)[C@@H]1O	0
rxn0126	10.1002/cbic.200900720	2.2.1.2	OC[C@H]1O[C@](O)(CO)[C@@H](O)[C@@H]1O	O=C(CO)CO	1
rxn0127	10.1002/cbic.200900720	2.2.1.2	OCC1(O)OC[C@H](O)[C@@H](O)[C@@H]1O	O=C(CO)CO	0
rxn0128	10.1002/cbic.200900720	2.2.1.2	O=C(CO)[C@@H](O)[C@H](O)CO	O=C(CO)CO	0
rxn0129	10.1002/cbic.200900720	2.2.1.2	O=C[C@@H](O)[C@H](O)CO	O=C(CO)CO	0
rxn0130	10.1021/ja065233q	4.1.3.3	CC(=O)N[C@@H]1[C@H](O)O[C@H](CO)[C@@H](O)[C@@H]1O	CC(=O)N[C@@H]1[C@H](O)C[C@](O)(C(=O)O)O[C@H]1[C@H](O)[C@H](O)CO	0
rxn0131	10.1021/ja208754r	4.1.3.39	C[C@H](O)CC(=O)C(=O)O	CC=O	0
rxn0132	10.1021/ja208754r	4.1.3.39	C[C@@H](O)CC(=O)C(=O)O	CC=O	0
rxn0133	10.1021/ja208754r	4.1.3.39	CC(O)CC(=O)C(=O)O	CC=O	1
rxn0134	10.1073/pnas.0635924100	4.1.2.40	O=P(O)(O)OC[C@H]1O[C@](O)(COP(=O)(O)O)[C@@H](O)[C@@H]1O	O=C[C@H](O)COP(=O)(O)O	0
rxn0135	10.1073/pnas.0635924100	4.1.2.40	O=P(O)(O)OC[C@H]1O[C@@](O)(COP(=O)(O)O)[C@@H](O)[C@@H]1O	O=C[C@@H](O)COP(=O)(O)O	0
rxn0136	10.1002/anie.200702616	1.14.14.1	CCC	CCCO	1
rxn0137	10.1002/anie.201001753	3.8.1.5	CC[C@@H](C)Cl	CC[C@@H](C)O	0
rxn0138	10.1002/anie.201001753	3.8.1.5	CC[C@@H](C)Br	CC[C@@H](C)O	0
rxn0139	10.1002/anie.201001753	3.8.1.5	CCC[C@@H](C)Br	CCC[C@@H](C)O	0
rxn0140	10.1002/anie.201001753	3.8.1.5	CCCC[C@@H](C)Br	CCCC[C@@H](C)O	0
rxn0141	10.1002/anie.201001753	3.8.1.5	C[C@@H](Cl)CCl	C[C@@H](Cl)CO	0
rxn0142	10.1002/anie.201001753	3.8.1.5	C[C@@H](Br)CBr	C[C@@H](Br)CO	0
rxn0143	10.1002/anie.201001753	3.8.1.5	CC(CCl)CBr	CC(CO)CBr	0
rxn0144	10.1002/anie.201001753	3.8.1.5	CCC(Cl)CCl	CCC(Cl)CO	0
rxn0145	10.1002/anie.201001753	3.8.1.5	CC(Cl)CCCl	CC(Cl)CCO	0
rxn0146	10.1002/anie.201001753	3.8.1.5	CCC(Br)CBr	CCC(Br)CO	0
rxn0147	10.1002/anie.201001753	3.8.1.5	CC(Br)CCBr	CC(Br)CCO	0
rxn0148	10.1002/anie.201001753	3.8.1.5	BrCC1CO1	OCC1CO1	0
rxn0149	10.1002/anie.201001753	3.8.1.5	COC(=O)[C@@H](C)Br	COC(=O)[C@@H](C)O	0
rxn0150	10.1002/anie.201001753	3.8.1.5	CCOC(=O)[C@@H](C)Br	CCOC(=O)[C@@H](C)O	0
rxn0151	10.1002/anie.201001753	3.8.1.5	CC[C@@H](Br)C(=O)OC	CC[C@@H](O)C(=O)OC	0
rxn0152	10.1002/anie.201001753	3.8.1.5	CCOC(=O)[C@H](Br)CC	CCOC(=O)[C@H](O)CC	0
rxn0153	10.1002/anie.201001753	3.8.1.5	COC(=O)C(C)CBr	COC(=O)C(C)CO	0
rxn0154	10.1002/anie.201001753	3.8.1.5	CCOC(=O)C(C)CBr	CCOC(=O)C(C)CO	1
rxn0155	10.1002/anie.201001753	3.8.1.5	Br[C@@H]1CCCC[C@H]1Br	O[C@@H]1CCCC[C@H]1Br	0
rxn0156	10.1002/anie.201001753	3.8.1.5	CC(Br)Cc1ccccc1	CC(O)Cc1ccccc1	0
rxn0157	10.1002/anie.201107813	1.4.1.9	CC(=O)CC(C)C	CC(C)C[C@@H](C)N	0
rxn0158	10.1002/anie.201107813	1.4.1.9	CC(C)C[C@@H](C)N	CC(=O)CC(C)C	0
rxn0159	10.1002/anie.201107813	1.4.1.9	C[C@@H](N)c1ccccc1	CC(=O)c1ccccc1	0
rxn0160	10.1002/anie.201107813	1.4.1.9	CC(N)c1ccccc1	CC(=O)c1ccccc1	1
rxn0161	10.1002/anie.201107813	1.4.1.9	NC1CCCCC1	O=C1CCCCC1	0
rxn0162	10.1002/anie.201107813	1.4.1.9	CCOC(=O)C(C)=O	CCOC(=O)[C@H](C)N	0
rxn0163	10.1002/anie.201107813	1.4.1.9	COC(=O)CC(C)=O	COC(=O)C[C@@H](C)N	0
rxn0164	10.1002/anie.201107813	1.4.1.9	CCCC(=O)CC(=O)OCC	CCC[C@H](N)CC(=O)OCC	0
rxn0165	10.1002/anie.201107813	1.4.1.9	CC(=O)c1ccccc1	CC(N)c1ccccc1	0
rxn0166	10.1016/j.tet.2012.06.031	2.6.1.-	CCN(C)C(=O)Oc1cccc(C(C)=O)c1	CCN(C)C(=O)Oc1cccc([C@H](C)N)c1	0
rxn0167	10.1002/elsc.200402162	1.4.1.9	CC(C)(C)C(=O)C(=O)O	CC(C)(C)[C@H](N)C(=O)O	0
rxn0168	10.1016/S0141-0229(99)00175-1	1.4.1.20	O=C(O)C(=O)CCCC1OCCO1	N[C@@H](CCCC1OCCO1)C(=O)O	0
rxn0169	10.1021/op900272d	1.1.1.-	COC(=O)c1ccccc1CCC(=O)c1cccc(/C=C/c2ccc3ccc(Cl)cc3n2)c1	COC(=O)c1ccccc1CC[C@H](O)c1cccc(/C=C/c2ccc3ccc(Cl)cc3n2)c1	0
rxn0170	10.1021/op400013e	1.4.5.-	O=C(O)C(=O)CCC(F)(F)F	N[C@H](CCC(F)(F)F)C(=O)O	1
rxn0171	10.1016/j.abb.2010.12.020	2.6.1.-	Cc1ccccc1-c1ccc(CC(=O)C(=O)O)cn1	Cc1ccccc1-c1ccc(C[C@H](N)C(=O)O)cn1	0
rxn0172	10.1021/op010232y	1.1.1.28	O=C(O)C(=O)Cc1ccc(F)cc1	O=C(O)[C@H](O)Cc1ccc(F)cc1	1
rxn0173	10.1002/bit.20751	1.1.1.-	Cc1ncc(/C=C/C(=O)CCCCc2ccc3c(n2)NCCC3)cn1	Cc1ncc(/C=C/[C@H](O)CCCCc2ccc3c(n2)NCCC3)cn1	0
rxn0174	10.1021/jo015579d	3.1.1.-	[N-]=[N+]=NCC(O)COc1cccc2ccccc12	CC(=O)OC(CN=[N+]=[N-])COc1cccc2ccccc12	0
rxn0175	10.1021/jo015579d	3.1.1.-	COc1ccc(C(O)CN=[N+]=[N-])cc1	COc1ccc(C(CN=[N+]=[N-])OC(C)=O)cc1	0
rxn0176	10.1016/j.tetasy.2005.07.015	1.1.1.-	O=C1CC2(CCCC2)C(=O)C(=O)N1CCCCN1CCN(c2ncccn2)CC1	O=C1CC2(CCCC2)[C@H](O)C(=O)N1CCCCN1CCN(c2ncccn2)CC1	0
rxn0177	10.1016/j.tetasy.2005.07.020	3.5.1.-	CC(=O)O[C@@H]1C(=O)N(CCCCN2CCN(c3ncccn3)CC2)C(=O)CC12CCCC2	O=C1CC2(CCCC2)[C@H](O)C(=O)N1CCCCN1CCN(c2ncccn2)CC1	0
rxn0178	10.1016/j.bmcl.2013.02.085	1.14.13.-	O=C1CC2C=CC(C1)C2	O=C1CC2C=CC(CO1)C2	1
rxn0179	10.1002/adsc.200700013	1.4.1.20	O=C(O)C(=O)C12CC3CC(CC(O)(C3)C1)C2	N[C@H](C(=O)O)C12CC3CC(CC(O)(C3)C1)C2	0
rxn0180	10.1021/op800149q	1.4.3.-	Cc1cc(C[C@@H](N)C(=O)O)cc2cn[nH]c12	Cc1cc(CC(=O)C(=O)O)cc2cn[nH]c12	0
rxn0181	10.1021/ja3010495	1.4.3.-	CC1(C)C2CNCC21	CC1(C)C2C=NCC21	0
rxn0182	10.1016/j.bej.2015.11.010	1.1.1.-	CCOC(=O)CC(=O)CCl	CCOC(=O)C[C@H](O)CCl	0
rxn0183	10.1016/j.enzmictec.2015.06.004	1.1.1.-	CC(C)(C)OC(=O)CC(=O)C#N	CC(C)(C)OC(=O)C[C@H](O)C#N	0
rxn0184	10.1021/jacs.5b07326	4.3.1.-	Cc1ccccc1/C=C/C(=O)O	Cc1ccccc1[C@@H](N)CC(=O)O	1

## Sheet: kegg_paths
module	part	stepNum	reactantSmiles	reactantKeggRef	productSmiles	productKeggRef	reactionKeggRef
M00001	1	1	OC[C@H]1O[C@H](O)[C@H](O)[C@@H](O)[C@@H]1O	C00267	O=P(O)(O)OC[C@H]1O[C@H](O)[C@H](O)[C@@H](O)[C@@H]1O	C00668	R01786;R02189;R09085
M00001	1	2	O=P(O)(O)OC[C@H]1O[C@H](O)[C@H](O)[C@@H](O)[C@@H]1O	C00668	O=P(O)(O)OC[C@H]1O[C@](O)(CO)[C@@H](O)[C@@H]1O	C05345	R02740
M00001	1	3	O=P(O)(O)OC[C@H]1O[C@](O)(CO)[C@@H](O)[C@@H]1O	C05345	O=P(O)(O)OC[C@H]1O[C@](O)(COP(=O)(O)O)[C@@H](O)[C@@H]1O	C05378	R04779;R09084
M00001	1	4	O=P(O)(O)OC[C@H]1O[C@](O)(COP(=O)(O)O)[C@@H](O)[C@@H]1O	C05378	O=C(CO)COP(=O)(O)O	C00111	R01070
M00001	1	5	O=C(CO)COP(=O)(O)O	C00111	O=C[C@H](O)COP(=O)(O)O	C00118	R01015
M00001	2	1	O=C[C@H](O)COP(=O)(O)O	C00118	O=C(OP(=O)(O)O)[C@H](O)COP(=O)(O)O	C00236	R01061;R01063
M00001	2	2	O=C(OP(=O)(O)O)[C@H](O)COP(=O)(O)O	C00236	O=C(O)[C@H](O)COP(=O)(O)O	C00197	R01512
M00001	2	3	O=C(O)[C@H](O)COP(=O)(O)O	C00197	O=C(O)[C@@H](CO)OP(=O)(O)O	C00631	R01518
M00001	2	4	O=C(O)[C@@H](CO)OP(=O)(O)O	C00631	C=C(OP(=O)(O)O)C(=O)O	C00074	R00658
M00001	2	5	C=C(OP(=O)(O)O)C(=O)O	C00074	CC(=O)C(=O)O	C00022	R00200
M00002	1	1	O=C(CO)COP(=O)(O)O	C00111	O=C[C@H](O)COP(=O)(O)O	C00118	R01015
M00002	1	2	O=C[C@H](O)COP(=O)(O)O	C00118	O=C(OP(=O)(O)O)[C@H](O)COP(=O)(O)O	C00236	R01061;R01063
M00002	1	3	O=C(OP(=O)(O)O)[C@H](O)COP(=O)(O)O	C00236	O=C(O)[C@H](O)COP(=O)(O)O	C00197	R01512
M00002	1	4	O=C(O)[C@H](O)COP(=O)(O)O	C00197	O=C(O)[C@@H](CO)OP(=O)(O)O	C00631	R01518
M00002	1	5	O=C(O)[C@@H](CO)OP(=O)(O)O	C00631	C=C(OP(=O)(O)O)C(=O)O	C00074	R00658
M00002	2	1	O=C[C@H](O)COP(=O)(O)O	C00118	O=C(OP(=O)(O)O)[C@H](O)COP(=O)(O)O	C00236	R01061;R01063
M00002	2	2	O=C(OP(=O)(O)O)[C@H](O)COP(=O)(O)O	C00236	O=C(O)[C@H](O)COP(=O)(O)O	C00197	R01512
M00002	2	3	O=C(O)[C@H](O)COP(=O)(O)O	C00197	O=C(O)[C@@H](CO)OP(=O)(O)O	C00631	R01518
M00002	2	4	O=C(O)[C@@H](CO)OP(=O)(O)O	C00631	C=C(OP(=O)(O)O)C(=O)O	C00074	R00658
M00002	2	5	C=C(OP(=O)(O)O)C(=O)O	C00074	CC(=O)C(=O)O	C00022	R00200
M00003	1	1	O=C(O)CC(=O)C(=O)O	C00036	C=C(OP(=O)(O)O)C(=O)O	C00074	R00341;R00431;R00726
M00003	1	2	C=C(OP(=O)(O)O)C(=O)O	C00074	O=C(O)[C@@H](CO)OP(=O)(O)O	C00631	R00658
M00003	1	3	O=C(O)[C@@H](CO)OP(=O)(O)O	C00631	O=C(O)[C@H](O)COP(=O)(O)O	C00197	R01518
M00003	1	4	O=C(O)[C@H](O)COP(=O)(O)O	C00197	O=C(OP(=O)(O)O)[C@H](O)COP(=O)(O)O	C00236	R01512
M00003	1	5	O=C(OP(=O)(O)O)[C@H](O)COP(=O)(O)O	C00236	O=C[C@H](O)COP(=O)(O)O	C00118	R01061;R01063
M00003	2	1	O=C(O)[C@H](O)COP(=O)(O)O	C00197	O=C(OP(=O)(O)O)[C@H](O)COP(=O)(O)O	C00236	R01512
M00003	2	2	O=C(OP(=O)(O)O)[C@H](O)COP(=O)(O)O	C00236	O=C[C@H](O)COP(=O)(O)O	C00118	R01061;R01063
M00003	2	3	O=C[C@H](O)COP(=O)(O)O	C00118	O=C(CO)COP(=O)(O)O	C00111	R01015
M00003	2	4	O=C(CO)COP(=O)(O)O	C00111	O=P(O)(O)OC[C@H]1O[C@](O)(COP(=O)(O)O)[C@@H](O)[C@@H]1O	C05378	R01070
M00003	2	5	O=P(O)(O)OC[C@H]1O[C@](O)(COP(=O)(O)O)[C@@H](O)[C@@H]1O	C05378	O=P(O)(O)OC[C@H]1O[C@](O)(CO)[C@@H](O)[C@@H]1O	C05345	R04780
M00004	1	1	O=P(O)(O)OC[C@H]1O[C@@H](O)[C@H](O)[C@@H](O)[C@@H]1O	C01172	O=C1O[C@H](COP(=O)(O)O)[C@@H](O)[C@H](O)[C@H]1O	C01236	R02736;R10907
M00004	1	2	O=C1O[C@H](COP(=O)(O)O)[C@@H](O)[C@H](O)[C@H]1O	C01236	O=C(O)[C@H](O)[C@@H](O)[C@H](O)[C@H](O)COP(=O)(O)O	C00345	R02035
M00004	1	3	O=C(O)[C@H](O)[C@@H](O)[C@H](O)[C@H](O)COP(=O)(O)O	C00345	O=C(CO)[C@H](O)[C@H](O)COP(=O)(O)O	C00199	R01528;R10221
M00004	1	4	O=C(CO)[C@H](O)[C@H](O)COP(=O)(O)O	C00199	O=P(O)(O)OC[C@H]1OC(O)[C@H](O)[C@@H]1O	C00117	R01056
M00004	1	5	O=P(O)(O)OC[C@H]1OC(O)[C@H](O)[C@@H]1O	C00117	O=C(CO)[C@@H](O)[C@H](O)[C@H](O)[C@H](O)COP(=O)(O)O	C05382	R01641
M00004	2	1	O=P(O)(O)OC[C@H]1OC(O)[C@H](O)[C@@H]1O	C00117	O=C(CO)[C@@H](O)[C@H](O)[C@H](O)[C@H](O)COP(=O)(O)O	C05382	R01641
M00004	2	2	O=C(CO)[C@@H](O)[C@H](O)[C@H](O)[C@H](O)COP(=O)(O)O	C05382	O=C[C@H](O)[C@H](O)COP(=O)(O)O	C00279	R01827
M00004	2	3	O=C[C@H](O)[C@H](O)COP(=O)(O)O	C00279	O=P(O)(O)OC[C@H]1O[C@](O)(CO)[C@@H](O)[C@@H]1O	C05345	R01830
M00004	2	4	O=P(O)(O)OC[C@H]1O[C@](O)(CO)[C@@H](O)[C@@H]1O	C05345	O=P(O)(O)OC[C@H]1O[C@H](O)[C@H](O)[C@@H](O)[C@@H]1O	C00668	R02740
M00004	2	5	O=P(O)(O)OC[C@H]1O[C@H](O)[C@H](O)[C@@H](O)[C@@H]1O	C00668	O=P(O)(O)OC[C@H]1O[C@@H](O)[C@H](O)[C@@H](O)[C@@H]1O	C01172	R02739
M00006	1	1	O=P(O)(O)OC[C@H]1O[C@@H](O)[C@H](O)[C@@H](O)[C@@H]1O	C01172	O=C1O[C@H](COP(=O)(O)O)[C@@H](O)[C@H](O)[C@H]1O	C01236	R02736;R10907
M00006	1	2	O=C1O[C@H](COP(=O)(O)O)[C@@H](O)[C@H](O)[C@H]1O	C01236	O=C(O)[C@H](O)[C@@H](O)[C@H](O)[C@H](O)COP(=O)(O)O	C00345	R02035
M00006	1	3	O=C(O)[C@H](O)[C@@H](O)[C@H](O)[C@H](O)COP(=O)(O)O	C00345	O=C(CO)[C@H](O)[C@H](O)COP(=O)(O)O	C00199	R01528;R10221
M00007	1	1	O=C[C@H](O)COP(=O)(O)O	C00118	O=C[C@H](O)[C@H](O)COP(=O)(O)O	C00279	R01830
M00007	1	2	O=C[C@H](O)[C@H](O)COP(=O)(O)O	C00279	O=C[C@H](O)COP(=O)(O)O	C00118	R01827
M00007	1	3	O=C[C@H](O)COP(=O)(O)O	C00118	O=C(CO)[C@@H](O)[C@H](O)COP(=O)(O)O	C00231	R01641
M00007	1	4	O=C(CO)[C@@H](O)[C@H](O)COP(=O)(O)O	C00231	O=C(CO)[C@H](O)[C@H](O)COP(=O)(O)O	C00199	R01529
M00007	1	5	O=C(CO)[C@H](O)[C@H](O)COP(=O)(O)O	C00199	O=P(O)(O)OC[C@H]1OC(O)[C@H](O)[C@@H]1O	C00117	R01056
M00008	1	1	O=P(O)(O)OC[C@H]1O[C@@H](O)[C@H](O)[C@@H](O)[C@@H]1O	C01172	O=C1O[C@H](COP(=O)(O)O)[C@@H](O)[C@H](O)[C@H]1O	C01236	R02736
M00008	1	2	O=C1O[C@H](COP(=O)(O)O)[C@@H](O)[C@H](O)[C@H]1O	C01236	O=C(O)[C@H](O)[C@@H](O)[C@H](O)[C@H](O)COP(=O)(O)O	C00345	R02035
M00008	1	3	O=C(O)[C@H](O)[C@@H](O)[C@H](O)[C@H](O)COP(=O)(O)O	C00345	O=C(O)C(=O)C[C@H](O)[C@H](O)COP(=O)(O)O	C04442	R02036
M00008	1	4	O=C(O)C(=O)C[C@H](O)[C@H](O)COP(=O)(O)O	C04442	CC(=O)C(=O)O	C00022	R05605
M00009	1	1	CC(=O)SCCNC(=O)CCNC(=O)[C@H](O)C(C)(C)COP(=O)(O)OP(=O)(O)OC[C@H]1O[C@@H](n2cnc3c(N)ncnc32)[C@H](O)[C@@H]1OP(=O)(O)O	C00024	O=C(O)CC(O)(CC(=O)O)C(=O)O	C00158	R00351
M00009	1	2	O=C(O)CC(O)(CC(=O)O)C(=O)O	C00158	O=C(O)CC(C(=O)O)C(O)C(=O)O	C00311	R01324;R01325;R01900
M00009	1	3	O=C(O)CC(C(=O)O)C(O)C(=O)O	C00311	O=C(O)CCC(=O)C(=O)O	C00026	R00267;R00268;R00709;R01899
M00009	1	4	O=C(O)CCC(=O)C(=O)O	C00026	*NC(=O)CCCCC(S)CCSC(=O)CCC(=O)O	C16254	R00621;R03316
M00009	2	1	CC(C)(COP(=O)(O)OP(=O)(O)OC[C@H]1O[C@@H](n2cnc3c(N)ncnc32)[C@H](O)[C@@H]1OP(=O)(O)O)[C@@H](O)C(=O)NCCC(=O)NCCSC(=O)CCC(=O)O	C00091	O=C(O)CCC(=O)O	C00042	R00405;R00432;R00727;R10343
M00009	2	2	O=C(O)CCC(=O)O	C00042	O=C(O)/C=C/C(=O)O	C00122	R02164
M00009	2	3	O=C(O)/C=C/C(=O)O	C00122	O=C(O)C[C@H](O)C(=O)O	C00149	R01082
M00009	2	4	O=C(O)C[C@H](O)C(=O)O	C00149	O=C(O)CC(=O)C(=O)O	C00036	R00342;R00361
M00010	1	1	CC(=O)SCCNC(=O)CCNC(=O)[C@H](O)C(C)(C)COP(=O)(O)OP(=O)(O)OC[C@H]1O[C@@H](n2cnc3c(N)ncnc32)[C@H](O)[C@@H]1OP(=O)(O)O	C00024	O=C(O)CC(O)(CC(=O)O)C(=O)O	C00158	R00351
M00010	1	2	O=C(O)CC(O)(CC(=O)O)C(=O)O	C00158	O=C(O)CC(C(=O)O)C(O)C(=O)O	C00311	R01324;R01325;R01900
M00010	1	3	O=C(O)CC(C(=O)O)C(O)C(=O)O	C00311	O=C(O)CCC(=O)C(=O)O	C00026	R00267;R00268;R00709;R01899
M00011	1	1	O=C(O)CCC(=O)C(=O)O	C00026	*NC(=O)CCCCC(S)CCSC(=O)CCC(=O)O	C16254	R00621;R03316
M00011	2	1	CC(C)(COP(=O)(O)OP(=O)(O)OC[C@H]1O[C@@H](n2cnc3c(N)ncnc32)[C@H](O)[C@@H]1OP(=O)(O)O)[C@@H](O)C(=O)NCCC(=O)NCCSC(=O)CCC(=O)O	C00091	O=C(O)CCC(=O)O	C00042	R00405;R00432;R00727;R10343
M00011	2	2	O=C(O)CCC(=O)O	C00042	O=C(O)/C=C/C(=O)O	C00122	R02164
M00011	2	3	O=C(O)/C=C/C(=O)O	C00122	O=C(O)C[C@H](O)C(=O)O	C00149	R01082
M00011	2	4	O=C(O)C[C@H](O)C(=O)O	C00149	O=C(O)CC(=O)C(=O)O	C00036	R00342;R00361
M00012	1	1	CC(=O)SCCNC(=O)CCNC(=O)[C@H](O)C(C)(C)COP(=O)(O)OP(=O)(O)OC[C@H]1O[C@@H](n2cnc3c(N)ncnc32)[C@H](O)[C@@H]1OP(=O)(O)O	C00024	O=C(O)CC(O)(CC(=O)O)C(=O)O	C00158	R00351
M00012	1	2	O=C(O)CC(O)(CC(=O)O)C(=O)O	C00158	O=C(O)/C=C(/CC(=O)O)C(=O)O	C00417	R01325
M00012	1	3	O=C(O)/C=C(/CC(=O)O)C(=O)O	C00417	O=C(O)CC(C(=O)O)C(O)C(=O)O	C00311	R01900
M00012	1	4	O=C(O)CC(C(=O)O)C(O)C(=O)O	C00311	O=CC(=O)O	C00048	R00479
M00012	1	5	O=CC(=O)O	C00048	O=C(O)C[C@H](O)C(=O)O	C00149	R00472;R00473;R10612
M00012	2	1	O=C(O)CC(O)(CC(=O)O)C(=O)O	C00158	O=C(O)/C=C(/CC(=O)O)C(=O)O	C00417	R01325
M00012	2	2	O=C(O)/C=C(/CC(=O)O)C(=O)O	C00417	O=C(O)CC(C(=O)O)C(O)C(=O)O	C00311	R01900
M00012	2	3	O=C(O)CC(C(=O)O)C(O)C(=O)O	C00311	O=CC(=O)O	C00048	R00479
M00012	2	4	O=CC(=O)O	C00048	O=C(O)C[C@H](O)C(=O)O	C00149	R00472;R00473;R10612
M00012	2	5	O=C(O)C[C@H](O)C(=O)O	C00149	O=C(O)CC(=O)C(=O)O	C00036	R00342
M00013	1	1	CCC(=O)SCCNC(=O)CCNC(=O)[C@H](O)C(C)(C)COP(=O)(O)OP(=O)(O)OC[C@H]1O[C@@H](n2cnc3c(N)ncnc32)[C@H](O)[C@@H]1OP(=O)(O)O	C00100	C=CC(=O)SCCNC(=O)CCNC(=O)[C@H](O)C(C)(C)COP(=O)(O)OP(=O)(O)OC[C@H]1O[C@@H](n2cnc3c(N)ncnc32)[C@H](O)[C@@H]1OP(=O)(O)O	C00894	R04432
M00013	1	2	C=CC(=O)SCCNC(=O)CCNC(=O)[C@H](O)C(C)(C)COP(=O)(O)OP(=O)(O)OC[C@H]1O[C@@H](n2cnc3c(N)ncnc32)[C@H](O)[C@@H]1OP(=O)(O)O	C00894	CC(C)(COP(=O)(O)OP(=O)(O)OC[C@H]1O[C@@H](n2cnc3c(N)ncnc32)[C@H](O)[C@@H]1OP(=O)(O)O)[C@@H](O)C(=O)NCCC(=O)NCCSC(=O)CCO	C05668	R03045
M00013	1	3	CC(C)(COP(=O)(O)OP(=O)(O)OC[C@H]1O[C@@H](n2cnc3c(N)ncnc32)[C@H](O)[C@@H]1OP(=O)(O)O)[C@@H](O)C(=O)NCCC(=O)NCCSC(=O)CCO	C05668	O=C(O)CCO	C01013	R03158
M00013	1	4	O=C(O)CCO	C01013	O=CCC(=O)O	C00222	R01608
M00013	1	5	O=CCC(=O)O	C00222	CC(=O)SCCNC(=O)CCNC(=O)[C@H](O)C(C)(C)COP(=O)(O)OP(=O)(O)OC[C@H]1O[C@@H](n2cnc3c(N)ncnc32)[C@H](O)[C@@H]1OP(=O)(O)O	C00024	R00705;R00706
M00014	1	1	O=c1ccn([C@@H]2O[C@H](COP(=O)(O)OP(=O)(O)O[C@H]3O[C@H](CO)[C@@H](O)[C@H](O)[C@H]3O)[C@@H](O)[C@H]2O)c(=O)[nH]1	C00029	O=C(O)[C@H]1O[C@H](OP(=O)(O)OP(=O)(O)OC[C@H]2O[C@@H](n3ccc(=O)[nH]c3=O)[C@H](O)[C@@H]2O)[C@H](O)[C@@H](O)[C@@H]1O	C00167	R00286
M00014	1	2	O=C(O)[C@H]1O[C@H](OP(=O)(O)OP(=O)(O)OC[C@H]2O[C@@H](n3ccc(=O)[nH]c3=O)[C@H](O)[C@@H]2O)[C@H](O)[C@@H](O)[C@@H]1O	C00167	O=C(O)[C@H]1O[C@H](OP(=O)(O)O)[C@H](O)[C@@H](O)[C@@H]1O	C05385	R01381
M00014	1	3	O=C(O)[C@H]1O[C@H](OP(=O)(O)O)[C@H](O)[C@@H](O)[C@@H]1O	C05385	O=C(O)[C@H]1OC(O)[C@H](O)[C@@H](O)[C@@H]1O	C00191	R01476
M00014	1	4	O=C(O)[C@H]1OC(O)[C@H](O)[C@@H](O)[C@@H]1O	C00191	O=C(O)[C@@H](O)[C@@H](O)[C@H](O)[C@@H](O)CO	C00800	R01481
M00014	1	5	O=C(O)[C@@H](O)[C@@H](O)[C@H](O)[C@@H](O)CO	C00800	O=C(O)[C@@H](O)C(=O)[C@H](O)[C@@H](O)CO	C00618	R02640
M00014	2	1	O=C(O)[C@@H](O)[C@@H](O)[C@H](O)[C@@H](O)CO	C00800	O=C(O)[C@@H](O)C(=O)[C@H](O)[C@@H](O)CO	C00618	R02640
M00014	2	2	O=C(O)[C@@H](O)C(=O)[C@H](O)[C@@H](O)CO	C00618	OC[C@]1(O)OC[C@@H](O)[C@H]1O	C00312	R01905
M00014	2	3	OC[C@]1(O)OC[C@@H](O)[C@H]1O	C00312	OC[C@H](O)[C@@H](O)[C@H](O)CO	C00379	R01904
M00014	2	4	OC[C@H](O)[C@@H](O)[C@H](O)CO	C00379	OC[C@]1(O)OC[C@@H](O)[C@H]1O	C00310	R01896
M00014	2	5	OC[C@]1(O)OC[C@@H](O)[C@H]1O	C00310	O=C(CO)[C@@H](O)[C@H](O)COP(=O)(O)O	C00231	R01639
M00015	1	1	N[C@@H](CCC(=O)O)C(=O)O	C00025	N[C@@H](CCC(=O)OP(=O)(O)O)C(=O)O	C03287	R00239
M00015	1	2	N[C@@H](CCC(=O)OP(=O)(O)O)C(=O)O	C03287	N[C@@H](CCC=O)C(=O)O	C01165	R03313
M00015	1	3	N[C@@H](CCC=O)C(=O)O	C01165	O=C(O)[C@@H]1CCC=N1	C03912	R03314
M00015	1	4	O=C(O)[C@@H]1CCC=N1	C03912	O=C(O)[C@@H]1CCCN1	C00148	R01251
M00016	1	1	N[C@@H](CC(=O)O)C(=O)O	C00049	N[C@@H](CC(=O)OP(=O)(O)O)C(=O)O	C03082	R00480
M00016	1	2	N[C@@H](CC(=O)OP(=O)(O)O)C(=O)O	C03082	N[C@@H](CC=O)C(=O)O	C00441	R02291
M00016	1	3	N[C@@H](CC=O)C(=O)O	C00441	O=C(O)C1=N[C@H](C(=O)O)C[C@H](O)C1	C20258	R10147
M00016	1	4	O=C(O)C1=N[C@H](C(=O)O)C[C@H](O)C1	C20258	O=C(O)C1=N[C@H](C(=O)O)CCC1	C03972	R04198;R04199
M00016	1	5	O=C(O)C1=N[C@H](C(=O)O)CCC1	C03972	O=C(O)CCC(=O)N[C@@H](CCCC(=O)C(=O)O)C(=O)O	C04462	R04365
M00016	2	1	O=C(O)C1=N[C@H](C(=O)O)CCC1	C03972	O=C(O)CCC(=O)N[C@@H](CCCC(=O)C(=O)O)C(=O)O	C04462	R04365
M00016	2	2	O=C(O)CCC(=O)N[C@@H](CCCC(=O)C(=O)O)C(=O)O	C04462	N[C@@H](CCC[C@H](NC(=O)CCC(=O)O)C(=O)O)C(=O)O	C04421	R04475
M00016	2	3	N[C@@H](CCC[C@H](NC(=O)CCC(=O)O)C(=O)O)C(=O)O	C04421	N[C@@H](CCC[C@H](N)C(=O)O)C(=O)O	C00666	R02734
M00016	2	4	N[C@@H](CCC[C@H](N)C(=O)O)C(=O)O	C00666	N[C@@H](CCC[C@@H](N)C(=O)O)C(=O)O	C00680	R02735
M00016	2	5	N[C@@H](CCC[C@@H](N)C(=O)O)C(=O)O	C00680	NCCCC[C@H](N)C(=O)O	C00047	R00451
M00017	1	1	N[C@@H](CC(=O)O)C(=O)O	C00049	N[C@@H](CC(=O)OP(=O)(O)O)C(=O)O	C03082	R00480
M00017	1	2	N[C@@H](CC(=O)OP(=O)(O)O)C(=O)O	C03082	N[C@@H](CC=O)C(=O)O	C00441	R02291
M00017	1	3	N[C@@H](CC=O)C(=O)O	C00441	N[C@@H](CCO)C(=O)O	C00263	R01773;R01775
M00017	1	4	N[C@@H](CCO)C(=O)O	C00263	N[C@@H](CCOC(=O)CCC(=O)O)C(=O)O	C01118	R01777
M00017	1	5	N[C@@H](CCOC(=O)CCC(=O)O)C(=O)O	C01118	N[C@@H](CCSC[C@H](N)C(=O)O)C(=O)O	C02291	R03260
M00017	2	1	N[C@@H](CC=O)C(=O)O	C00441	N[C@@H](CCO)C(=O)O	C00263	R01773;R01775
M00017	2	2	N[C@@H](CCO)C(=O)O	C00263	N[C@@H](CCOC(=O)CCC(=O)O)C(=O)O	C01118	R01777
M00017	2	3	N[C@@H](CCOC(=O)CCC(=O)O)C(=O)O	C01118	N[C@@H](CCSC[C@H](N)C(=O)O)C(=O)O	C02291	R03260
M00017	2	4	N[C@@H](CCSC[C@H](N)C(=O)O)C(=O)O	C02291	N[C@@H](CCS)C(=O)O	C00155	R01286
M00017	2	5	N[C@@H](CCS)C(=O)O	C00155	CSCC[C@H](N)C(=O)O	C00073	R00946;R04405
M00018	1	1	N[C@@H](CC(=O)O)C(=O)O	C00049	N[C@@H](CC(=O)OP(=O)(O)O)C(=O)O	C03082	R00480
M00018	1	2	N[C@@H](CC(=O)OP(=O)(O)O)C(=O)O	C03082	N[C@@H](CC=O)C(=O)O	C00441	R02291
M00018	1	3	N[C@@H](CC=O)C(=O)O	C00441	N[C@@H](CCO)C(=O)O	C00263	R01773;R01775
M00018	1	4	N[C@@H](CCO)C(=O)O	C00263	N[C@@H](CCOP(=O)(O)O)C(=O)O	C01102	R01771
M00018	1	5	N[C@@H](CCOP(=O)(O)O)C(=O)O	C01102	C[C@@H](O)[C@H](N)C(=O)O	C00188	R01466
M00020	1	1	O=C(O)[C@H](O)COP(=O)(O)O	C00197	O=C(O)C(=O)COP(=O)(O)O	C03232	R01513
M00020	1	2	O=C(O)C(=O)COP(=O)(O)O	C03232	N[C@@H](COP(=O)(O)O)C(=O)O	C01005	R04173
M00020	1	3	N[C@@H](COP(=O)(O)O)C(=O)O	C01005	N[C@@H](CO)C(=O)O	C00065	R00582
M00021	1	1	N[C@@H](CO)C(=O)O	C00065	CC(=O)OC[C@H](N)C(=O)O	C00979	R00586
M00021	1	2	CC(=O)OC[C@H](N)C(=O)O	C00979	N[C@@H](CS)C(=O)O	C00097	R00897
M00022	1	1	C=C(OP(=O)(O)O)C(=O)O	C00074	O=C(O)C(=O)C[C@@H](O)[C@H](O)[C@H](O)COP(=O)(O)O	C04691	R01826
M00022	1	2	O=C(O)C(=O)C[C@@H](O)[C@H](O)[C@H](O)COP(=O)(O)O	C04691	O=C1C[C@@](O)(C(=O)O)C[C@@H](O)[C@@H]1O	C00944	R03083
M00022	1	3	O=C1C[C@@](O)(C(=O)O)C[C@@H](O)[C@@H]1O	C00944	O=C(O)C1=CC(=O)[C@@H](O)[C@H](O)C1	C02637	R03084
M00022	1	4	O=C(O)C1=CC(=O)[C@@H](O)[C@H](O)C1	C02637	O=C(O)C1=C[C@@H](O)[C@@H](O)[C@H](O)C1	C00493	R02413
M00022	1	5	O=C(O)C1=C[C@@H](O)[C@@H](O)[C@H](O)C1	C00493	O=C(O)C1=C[C@@H](OP(=O)(O)O)[C@@H](O)[C@H](O)C1	C03175	R02412
M00022	2	1	O=C1C[C@@](O)(C(=O)O)C[C@@H](O)[C@@H]1O	C00944	O=C(O)C1=CC(=O)[C@@H](O)[C@H](O)C1	C02637	R03084
M00022	2	2	O=C(O)C1=CC(=O)[C@@H](O)[C@H](O)C1	C02637	O=C(O)C1=C[C@@H](O)[C@@H](O)[C@H](O)C1	C00493	R02413
M00022	2	3	O=C(O)C1=C[C@@H](O)[C@@H](O)[C@H](O)C1	C00493	O=C(O)C1=C[C@@H](OP(=O)(O)O)[C@@H](O)[C@H](O)C1	C03175	R02412
M00022	2	4	O=C(O)C1=C[C@@H](OP(=O)(O)O)[C@@H](O)[C@H](O)C1	C03175	C=C(O[C@@H]1CC(C(=O)O)=C[C@@H](OP(=O)(O)O)[C@H]1O)C(=O)O	C01269	R03460
M00022	2	5	C=C(O[C@@H]1CC(C(=O)O)=C[C@@H](OP(=O)(O)O)[C@H]1O)C(=O)O	C01269	C=C(O[C@@H]1C=C(C(=O)O)C=C[C@H]1O)C(=O)O	C00251	R01714
M00023	1	1	C=C(O[C@@H]1C=C(C(=O)O)C=C[C@H]1O)C(=O)O	C00251	Nc1ccccc1C(=O)O	C00108	R00985;R00986
M00023	1	2	Nc1ccccc1C(=O)O	C00108	O=C(O)c1ccccc1N[C@@H]1O[C@H](COP(=O)(O)O)[C@@H](O)[C@H]1O	C04302	R01073
M00023	1	3	O=C(O)c1ccccc1N[C@@H]1O[C@H](COP(=O)(O)O)[C@@H](O)[C@H]1O	C04302	O=C(O)c1ccccc1NCC(=O)[C@H](O)[C@H](O)COP(=O)(O)O	C01302	R03509
M00023	1	4	O=C(O)c1ccccc1NCC(=O)[C@H](O)[C@H](O)COP(=O)(O)O	C01302	O=P(O)(O)OC[C@@H](O)[C@@H](O)c1c[nH]c2ccccc12	C03506	R03508
M00023	1	5	O=P(O)(O)OC[C@@H](O)[C@@H](O)c1c[nH]c2ccccc12	C03506	N[C@@H](Cc1c[nH]c2ccccc12)C(=O)O	C00078	R02722
M00024	1	1	C=C(O[C@@H]1C=C(C(=O)O)C=C[C@H]1O)C(=O)O	C00251	O=C(O)C(=O)C[C@]1(C(=O)O)C=C[C@@H](O)C=C1	C00254	R01715
M00024	1	2	O=C(O)C(=O)C[C@]1(C(=O)O)C=C[C@@H](O)C=C1	C00254	O=C(O)C(=O)Cc1ccccc1	C00166	R01373
M00024	1	3	O=C(O)C(=O)Cc1ccccc1	C00166	N[C@@H](Cc1ccccc1)C(=O)O	C00079	R00694
M00025	1	1	C=C(O[C@@H]1C=C(C(=O)O)C=C[C@H]1O)C(=O)O	C00251	O=C(O)C(=O)C[C@]1(C(=O)O)C=C[C@@H](O)C=C1	C00254	R01715
M00025	1	2	O=C(O)C(=O)C[C@]1(C(=O)O)C=C[C@@H](O)C=C1	C00254	O=C(O)C(=O)Cc1ccc(O)cc1	C01179	R01728
M00025	1	3	O=C(O)C(=O)Cc1ccc(O)cc1	C01179	N[C@@H](Cc1ccc(O)cc1)C(=O)O	C00082	R00734
M00026	1	1	O=P(O)(O)OC[C@H]1O[C@H](OP(=O)(O)OP(=O)(O)O)[C@H](O)[C@@H]1O	C00119	N=c1c2ncn([C@@H]3O[C@H](COP(=O)(O)OP(=O)(O)OP(=O)(O)O)[C@@H](O)[C@H]3O)c2ncn1[C@@H]1O[C@H](COP(=O)(O)O)[C@@H](O)[C@H]1O	C02739	R01071
M00026	1	2	N=c1c2ncn([C@@H]3O[C@H](COP(=O)(O)OP(=O)(O)OP(=O)(O)O)[C@@H](O)[C@H]3O)c2ncn1[C@@H]1O[C@H](COP(=O)(O)O)[C@@H](O)[C@H]1O	C02739	N=c1c2ncn([C@@H]3O[C@H](COP(=O)(O)O)[C@@H](O)[C@H]3O)c2ncn1[C@@H]1O[C@H](COP(=O)(O)O)[C@@H](O)[C@H]1O	C02741	R04035
M00026	1	3	N=c1c2ncn([C@@H]3O[C@H](COP(=O)(O)O)[C@@H](O)[C@H]3O)c2ncn1[C@@H]1O[C@H](COP(=O)(O)O)[C@@H](O)[C@H]1O	C02741	NC(=O)c1ncn([C@@H]2O[C@H](COP(=O)(O)O)[C@@H](O)[C@H]2O)c1/N=C/N[C@@H]1O[C@H](COP(=O)(O)O)[C@@H](O)[C@H]1O	C04896	R04037
M00026	1	4	NC(=O)c1ncn([C@@H]2O[C@H](COP(=O)(O)O)[C@@H](O)[C@H]2O)c1/N=C/N[C@@H]1O[C@H](COP(=O)(O)O)[C@@H](O)[C@H]1O	C04896	NC(=O)c1ncn([C@@H]2O[C@H](COP(=O)(O)O)[C@@H](O)[C@H]2O)c1/N=C/NCC(=O)[C@H](O)[C@H](O)COP(=O)(O)O	C04916	R04640
M00026	1	5	NC(=O)c1ncn([C@@H]2O[C@H](COP(=O)(O)O)[C@@H](O)[C@H]2O)c1/N=C/NCC(=O)[C@H](O)[C@H](O)COP(=O)(O)O	C04916	O=P(O)(O)OC[C@@H](O)[C@@H](O)c1c[nH]cn1	C04666	R04558
M00026	2	1	O=P(O)(O)OC[C@@H](O)[C@@H](O)c1c[nH]cn1	C04666	O=C(COP(=O)(O)O)Cc1c[nH]cn1	C01267	R03457
M00026	2	2	O=C(COP(=O)(O)O)Cc1c[nH]cn1	C01267	N[C@H](COP(=O)(O)O)Cc1c[nH]cn1	C01100	R03243
M00026	2	3	N[C@H](COP(=O)(O)O)Cc1c[nH]cn1	C01100	N[C@H](CO)Cc1c[nH]cn1	C00860	R03013
M00026	2	4	N[C@H](CO)Cc1c[nH]cn1	C00860	N[C@H](C=O)Cc1c[nH]cn1	C01929	R03012
M00026	2	5	N[C@H](C=O)Cc1c[nH]cn1	C01929	N[C@@H](Cc1c[nH]cn1)C(=O)O	C00135	R01163
M00027	1	1	N[C@@H](CCC(=O)O)C(=O)O	C00025	NCCCC(=O)O	C00334	R00261
M00027	1	2	NCCCC(=O)O	C00334	O=CCCC(=O)O	C00232	R01648;R10178
M00027	1	3	O=CCCC(=O)O	C00232	O=C(O)CCC(=O)O	C00042	R00713;R00714
M00028	1	1	N[C@@H](CCC(=O)O)C(=O)O	C00025	CC(=O)N[C@@H](CCC(=O)O)C(=O)O	C00624	R00259
M00028	1	2	CC(=O)N[C@@H](CCC(=O)O)C(=O)O	C00624	CC(=O)N[C@@H](CCC(=O)OP(=O)(O)O)C(=O)O	C04133	R02649
M00028	1	3	CC(=O)N[C@@H](CCC(=O)OP(=O)(O)O)C(=O)O	C04133	CC(=O)N[C@@H](CCC=O)C(=O)O	C01250	R03443
M00028	1	4	CC(=O)N[C@@H](CCC=O)C(=O)O	C01250	CC(=O)N[C@@H](CCCN)C(=O)O	C00437	R02283
M00028	1	5	CC(=O)N[C@@H](CCCN)C(=O)O	C00437	NCCC[C@H](N)C(=O)O	C00077	R00669;R02282
M00029	1	1	N	C00014	NC(=O)OP(=O)(O)O	C00169	R00149
M00029	1	2	NC(=O)OP(=O)(O)O	C00169	NC(=O)NCCC[C@H](N)C(=O)O	C00327	R01398
M00029	1	3	NC(=O)NCCC[C@H](N)C(=O)O	C00327	N=C(NCCC[C@H](N)C(=O)O)N[C@@H](CC(=O)O)C(=O)O	C03406	R01954
M00029	1	4	N=C(NCCC[C@H](N)C(=O)O)N[C@@H](CC(=O)O)C(=O)O	C03406	N=C(N)NCCC[C@H](N)C(=O)O	C00062	R01086
M00029	1	5	N=C(N)NCCC[C@H](N)C(=O)O	C00062	NC(N)=O	C00086	R00551
M00030	1	1	CC(=O)SCCNC(=O)CCNC(=O)[C@H](O)C(C)(C)COP(=O)(O)OP(=O)(O)OC[C@H]1O[C@@H](n2cnc3c(N)ncnc32)[C@H](O)[C@@H]1OP(=O)(O)O	C00024	O=C(O)CC[C@@](O)(CC(=O)O)C(=O)O	C01251	R00271
M00030	1	2	O=C(O)CC[C@@](O)(CC(=O)O)C(=O)O	C01251	O=C(O)/C=C(/CCC(=O)O)C(=O)O	C04002	R03444
M00030	1	3	O=C(O)/C=C(/CCC(=O)O)C(=O)O	C04002	O=C(O)CC[C@H](C(=O)O)[C@@H](O)C(=O)O	C05662	R04371
M00030	1	4	O=C(O)CC[C@H](C(=O)O)[C@@H](O)C(=O)O	C05662	O=C(O)CCCC(=O)C(=O)O	C00322	R01934
M00030	1	5	O=C(O)CCCC(=O)C(=O)O	C00322	N[C@@H](CCCC(=O)O)C(=O)O	C00956	R01939
M00030	2	1	O=C(O)CC[C@@](O)(CC(=O)O)C(=O)O	C01251	O=C(O)/C=C(/CCC(=O)O)C(=O)O	C04002	R03444
M00030	2	2	O=C(O)/C=C(/CCC(=O)O)C(=O)O	C04002	O=C(O)CC[C@H](C(=O)O)[C@@H](O)C(=O)O	C05662	R04371
M00030	2	3	O=C(O)CC[C@H](C(=O)O)[C@@H](O)C(=O)O	C05662	O=C(O)CCCC(=O)C(=O)O	C00322	R01934
M00030	2	4	O=C(O)CCCC(=O)C(=O)O	C00322	N[C@@H](CCCC(=O)O)C(=O)O	C00956	R01939
M00030	2	5	N[C@@H](CCCC(=O)O)C(=O)O	C00956	Nc1ncnc2c1ncn2[C@@H]1O[C@H](COP(=O)(O)OC(=O)CCC[C@H](N)C(=O)O)[C@@H](O)[C@H]1O	C05560	R03098
M00030	3	1	N[C@@H](CCCC=O)C(=O)O	C04076	N[C@@H](CCCCN[C@@H](CCC(=O)O)C(=O)O)C(=O)O	C00449	R02315
M00030	3	2	N[C@@H](CCCCN[C@@H](CCC(=O)O)C(=O)O)C(=O)O	C00449	NCCCC[C@H](N)C(=O)O	C00047	R00715
M00032	1	1	NCCCC[C@H](N)C(=O)O	C00047	N[C@@H](CCCCN[C@@H](CCC(=O)O)C(=O)O)C(=O)O	C00449	R00715;R00716
M00032	1	2	N[C@@H](CCCCN[C@@H](CCC(=O)O)C(=O)O)C(=O)O	C00449	N[C@@H](CCCC=O)C(=O)O	C04076	R02313;R02315
M00032	1	3	N[C@@H](CCCC=O)C(=O)O	C04076	N[C@@H](CCCC(=O)O)C(=O)O	C00956	R03102;R03103
M00032	1	4	N[C@@H](CCCC(=O)O)C(=O)O	C00956	O=C(O)CCCC(=O)C(=O)O	C00322	R01939
M00032	2	1	CC(C)(COP(=O)(O)OP(=O)(O)OC[C@H]1O[C@@H](n2cnc3c(N)ncnc32)[C@H](O)[C@@H]1OP(=O)(O)O)[C@@H](O)C(=O)NCCC(=O)NCCSC(=O)CCCC(=O)O	C00527	C/C=C/C(=O)SCCNC(=O)CCNC(=O)[C@H](O)C(C)(C)COP(=O)(O)OP(=O)(O)OC[C@H]1O[C@@H](n2cnc3c(N)ncnc32)[C@H](O)[C@@H]1OP(=O)(O)O	C00877	R02488
M00032	2	2	C/C=C/C(=O)SCCNC(=O)CCNC(=O)[C@H](O)C(C)(C)COP(=O)(O)OP(=O)(O)OC[C@H]1O[C@@H](n2cnc3c(N)ncnc32)[C@H](O)[C@@H]1OP(=O)(O)O	C00877	C[C@H](O)CC(=O)SCCNC(=O)CCNC(=O)[C@H](O)C(C)(C)COP(=O)(O)OP(=O)(O)OC[C@H]1O[C@@H](n2cnc3c(N)ncnc32)[C@H](O)[C@@H]1OP(=O)(O)O	C01144	R03026
M00032	2	3	C[C@H](O)CC(=O)SCCNC(=O)CCNC(=O)[C@H](O)C(C)(C)COP(=O)(O)OP(=O)(O)OC[C@H]1O[C@@H](n2cnc3c(N)ncnc32)[C@H](O)[C@@H]1OP(=O)(O)O	C01144	CC(=O)CC(=O)SCCNC(=O)CCNC(=O)[C@H](O)C(C)(C)COP(=O)(O)OP(=O)(O)OC[C@H]1O[C@@H](n2cnc3c(N)ncnc32)[C@H](O)[C@@H]1OP(=O)(O)O	C00332	R01975
M00033	1	1	N[C@@H](CC(=O)O)C(=O)O	C00049	N[C@@H](CC(=O)OP(=O)(O)O)C(=O)O	C03082	R00480
M00033	1	2	N[C@@H](CC(=O)OP(=O)(O)O)C(=O)O	C03082	N[C@@H](CC=O)C(=O)O	C00441	R02291
M00033	1	3	N[C@@H](CC=O)C(=O)O	C00441	NCC[C@H](N)C(=O)O	C03283	R06977
M00033	1	4	NCC[C@H](N)C(=O)O	C03283	CC(=O)NCC[C@H](N)C(=O)O	C06442	R06978
M00033	1	5	CC(=O)NCC[C@H](N)C(=O)O	C06442	CC1=N[C@H](C(=O)O)CCN1	C06231	R06979
M00034	1	1	CSCC[C@H](N)C(=O)O	C00073	C[S+](CC[C@H](N)C(=O)[O-])C[C@H]1O[C@@H](n2cnc3c(N)ncnc32)[C@H](O)[C@@H]1O	C00019	R00177
M00034	1	2	C[S+](CC[C@H](N)C(=O)[O-])C[C@H]1O[C@@H](n2cnc3c(N)ncnc32)[C@H](O)[C@@H]1O	C00019	C[S+](CCCN)C[C@H]1O[C@@H](n2cnc3c(N)ncnc32)[C@H](O)[C@@H]1O	C01137	R00178
M00034	1	3	C[S+](CCCN)C[C@H]1O[C@@H](n2cnc3c(N)ncnc32)[C@H](O)[C@@H]1O	C01137	CSC[C@H]1O[C@@H](n2cnc3c(N)ncnc32)[C@H](O)[C@@H]1O	C00170	R01920
M00034	1	4	CSC[C@H]1O[C@@H](n2cnc3c(N)ncnc32)[C@H](O)[C@@H]1O	C00170	CSC[C@H]1OC(O)[C@H](O)[C@@H]1O	C03089	R01401
M00034	1	5	CSC[C@H]1OC(O)[C@H](O)[C@@H]1O	C03089	CSC[C@H]1O[C@H](OP(=O)(O)O)[C@H](O)[C@@H]1O	C04188	R04143
M00034	2	1	CSC[C@@H](O)[C@@H](O)C(=O)COP(=O)(O)O	C04582	CSCCC(=O)C(=O)COP(=O)(O)O	C15650	R07392
M00034	2	2	CSCCC(=O)C(=O)COP(=O)(O)O	C15650	CSCCC(=O)/C(O)=C/OP(=O)(O)O	C15651	R07393
M00034	2	3	CSCCC(=O)/C(O)=C/OP(=O)(O)O	C15651	CSCCC(=O)/C(O)=C/O	C15606	R07394
M00034	2	4	CSCCC(=O)/C(O)=C/O	C15606	CSCCC(=O)C(=O)O	C01180	R07364
M00034	2	5	CSCCC(=O)C(=O)O	C01180	CSCC[C@H](N)C(=O)O	C00073	R07396
M00035	1	1	CSCC[C@H](N)C(=O)O	C00073	C[S+](CC[C@H](N)C(=O)[O-])C[C@H]1O[C@@H](n2cnc3c(N)ncnc32)[C@H](O)[C@@H]1O	C00019	R00177
M00035	2	1	Nc1ncnc2c1ncn2[C@@H]1O[C@H](CSCC[C@H](N)C(=O)O)[C@@H](O)[C@H]1O	C00021	N[C@@H](CCS)C(=O)O	C00155	R00192
M00035	2	2	N[C@@H](CCS)C(=O)O	C00155	N[C@@H](CCSC[C@H](N)C(=O)O)C(=O)O	C02291	R01290
M00036	1	1	CC(C)C[C@H](N)C(=O)O	C00123	CC(C)CC(=O)C(=O)O	C00233	R01090
M00036	1	2	CC(C)CC(=O)C(=O)O	C00233	*NC(=O)CCCCC(S)CCSC(=O)CC(C)C	C15975	R07601;R07602
M00036	2	1	CC(C)CC(=O)SCCNC(=O)CCNC(=O)[C@H](O)C(C)(C)COP(=O)(O)OP(=O)(O)OC[C@H]1O[C@@H](n2cnc3c(N)ncnc32)[C@H](O)[C@@H]1OP(=O)(O)O	C02939	CC(C)=CC(=O)SCCNC(=O)CCNC(=O)[C@H](O)C(C)(C)COP(=O)(O)OP(=O)(O)OC[C@H]1O[C@@H](n2cnc3c(N)ncnc32)[C@H](O)[C@@H]1OP(=O)(O)O	C03069	R04095
M00036	3	1	C/C(=C\C(=O)SCCNC(=O)CCNC(=O)[C@H](O)C(C)(C)COP(=O)(O)OP(=O)(O)OC[C@H]1O[C@@H](n2cnc3c(N)ncnc32)[C@H](O)[C@@H]1OP(=O)(O)O)CC(=O)O	C03231	CC(C)(COP(=O)(O)OP(=O)(O)OC[C@H]1O[C@@H](n2cnc3c(N)ncnc32)[C@H](O)[C@@H]1OP(=O)(O)O)[C@@H](O)C(=O)NCCC(=O)NCCSC(=O)C[C@@](C)(O)CC(=O)O	C00356	R02085
M00036	3	2	CC(C)(COP(=O)(O)OP(=O)(O)OC[C@H]1O[C@@H](n2cnc3c(N)ncnc32)[C@H](O)[C@@H]1OP(=O)(O)O)[C@@H](O)C(=O)NCCC(=O)NCCSC(=O)C[C@@](C)(O)CC(=O)O	C00356	CC(=O)CC(=O)O	C00164	R01360
M00037	1	1	N[C@@H](Cc1c[nH]c2ccccc12)C(=O)O	C00078	N[C@@H](Cc1c[nH]c2ccc(O)cc12)C(=O)O	C00643	R01814
M00037	1	2	N[C@@H](Cc1c[nH]c2ccc(O)cc12)C(=O)O	C00643	NCCc1c[nH]c2ccc(O)cc12	C00780	R02701
M00037	1	3	NCCc1c[nH]c2ccc(O)cc12	C00780	CC(=O)NCCc1c[nH]c2ccc(O)cc12	C00978	R02911
M00037	1	4	CC(=O)NCCc1c[nH]c2ccc(O)cc12	C00978	COc1ccc2[nH]cc(CCNC(C)=O)c2c1	C01598	R03130
M00038	1	1	N[C@@H](Cc1c[nH]c2ccccc12)C(=O)O	C00078	N[C@@H](CC(=O)c1ccccc1NC=O)C(=O)O	C02700	R00678
M00038	1	2	N[C@@H](CC(=O)c1ccccc1NC=O)C(=O)O	C02700	Nc1ccccc1C(=O)C[C@H](N)C(=O)O	C00328	R01959
M00038	1	3	Nc1ccccc1C(=O)C[C@H](N)C(=O)O	C00328	Nc1c(O)cccc1C(=O)C[C@H](N)C(=O)O	C03227	R01960
M00038	1	4	Nc1c(O)cccc1C(=O)C[C@H](N)C(=O)O	C03227	Nc1c(O)cccc1C(=O)O	C00632	R02668
M00038	1	5	Nc1c(O)cccc1C(=O)O	C00632	N/C(C(=O)O)=C(/C=C\C=O)C(=O)O	C04409	R02665
M00038	2	1	Nc1ccccc1C(=O)C[C@H](N)C(=O)O	C00328	Nc1c(O)cccc1C(=O)C[C@H](N)C(=O)O	C03227	R01960
M00038	2	2	Nc1c(O)cccc1C(=O)C[C@H](N)C(=O)O	C03227	Nc1c(O)cccc1C(=O)O	C00632	R02668
M00038	2	3	Nc1c(O)cccc1C(=O)O	C00632	N/C(C(=O)O)=C(/C=C\C=O)C(=O)O	C04409	R02665
M00038	2	4	N/C(C(=O)O)=C(/C=C\C=O)C(=O)O	C04409	N/C(=C/C=C\C=O)C(=O)O	C03824	R04323
M00038	2	5	N/C(=C/C=C\C=O)C(=O)O	C03824	N/C(=C/C=C\C(=O)O)C(=O)O	C02220	R03889
M00039	1	1	N[C@@H](Cc1ccccc1)C(=O)O	C00079	O=C(O)/C=C/c1ccccc1	C00423	R00697
M00039	2	1	O=C(O)/C=C/c1ccc(O)cc1	C00811	CC(C)(COP(=O)(O)OP(=O)(O)OC[C@H]1O[C@@H](n2cnc3c(N)ncnc32)[C@H](O)[C@@H]1OP(=O)(O)O)[C@@H](O)C(=O)NCCC(=O)NCCSC(=O)/C=C/c1ccc(O)cc1	C00223	R01616
M00039	2	2	CC(C)(COP(=O)(O)OP(=O)(O)OC[C@H]1O[C@@H](n2cnc3c(N)ncnc32)[C@H](O)[C@@H]1OP(=O)(O)O)[C@@H](O)C(=O)NCCC(=O)NCCSC(=O)/C=C/c1ccc(O)cc1	C00223	O=C(/C=C/c1ccc(O)cc1)O[C@@H]1CC(C(=O)O)=C[C@@H](O)[C@H]1O	C02947	R02416
M00039	2	3	O=C(/C=C/c1ccc(O)cc1)O[C@@H]1CC(C(=O)O)=C[C@@H](O)[C@H]1O	C02947	O=C(/C=C/c1ccc(O)c(O)c1)O[C@@H]1CC(C(=O)O)=C[C@@H](O)[C@H]1O	C10434	R06582
M00039	2	4	O=C(/C=C/c1ccc(O)c(O)c1)O[C@@H]1CC(C(=O)O)=C[C@@H](O)[C@H]1O	C10434	O=C(O)/C=C/c1ccc(O)c(O)c1	C01197	R10701
M00039	2	5	O=C(O)/C=C/c1ccc(O)c(O)c1	C01197	CC(C)(COP(=O)(O)OP(=O)(O)OC[C@H]1O[C@@H](n2cnc3c(N)ncnc32)[C@H](O)[C@@H]1OP(=O)(O)O)[C@@H](O)C(=O)NCCC(=O)NCCSC(=O)/C=C/c1ccc(O)c(O)c1	C00323	R01943
M00039	3	1	CC(C)(COP(=O)(O)OP(=O)(O)OC[C@H]1O[C@@H](n2cnc3c(N)ncnc32)[C@H](O)[C@@H]1OP(=O)(O)O)[C@@H](O)C(=O)NCCC(=O)NCCSC(=O)/C=C/c1ccc(O)c(O)c1	C00323	COc1cc(/C=C/C(=O)SCCNC(=O)CCNC(=O)[C@H](O)C(C)(C)COP(=O)(O)OP(=O)(O)OC[C@H]2O[C@@H](n3cnc4c(N)ncnc43)[C@H](O)[C@@H]2OP(=O)(O)O)ccc1O	C00406	R01942
M00039	3	2	COc1cc(/C=C/C(=O)SCCNC(=O)CCNC(=O)[C@H](O)C(C)(C)COP(=O)(O)OP(=O)(O)OC[C@H]2O[C@@H](n3cnc4c(N)ncnc43)[C@H](O)[C@@H]2OP(=O)(O)O)ccc1O	C00406	COc1cc(/C=C/C=O)ccc1O	C02666	R02193
M00039	3	3	COc1cc(/C=C/C=O)ccc1O	C02666	COc1cc(/C=C/C=O)cc(O)c1O	C12204	R06572
M00039	3	4	COc1cc(/C=C/C=O)cc(O)c1O	C12204	COc1cc(/C=C/C=O)cc(OC)c1O	C05610	R06576
M00039	3	5	COc1cc(/C=C/C=O)cc(OC)c1O	C05610	COc1cc(/C=C/CO)cc(OC)c1O	C02325	R03918
M00040	1	1	N[C@@H](CC1(C(=O)O)C=CC(O)C=C1)C(=O)O	C00826	N[C@@H](Cc1ccc(O)cc1)C(=O)O	C00082	R00732;R00733
M00042	1	1	N[C@@H](Cc1ccc(O)cc1)C(=O)O	C00082	N[C@@H](Cc1ccc(O)c(O)c1)C(=O)O	C00355	R00731;R01815
M00042	1	2	N[C@@H](Cc1ccc(O)c(O)c1)C(=O)O	C00355	NCCc1ccc(O)c(O)c1	C03758	R02080
M00042	1	3	NCCc1ccc(O)c(O)c1	C03758	NC[C@H](O)c1ccc(O)c(O)c1	C00547	R02535
M00042	1	4	NC[C@H](O)c1ccc(O)c(O)c1	C00547	CNC[C@H](O)c1ccc(O)c(O)c1	C00788	R02533
M00043	1	1	N[C@@H](Cc1ccc(O)cc1)C(=O)O	C00082	N[C@@H](Cc1ccc(O)c(I)c1)C(=O)O	C02515	R03539
M00043	1	2	N[C@@H](Cc1ccc(O)c(I)c1)C(=O)O	C02515	N[C@@H](Cc1cc(I)c(O)c(I)c1)C(=O)O	C01060	R03973
M00043	1	3	N[C@@H](Cc1cc(I)c(O)c(I)c1)C(=O)O	C01060	N[C@@H](Cc1cc(I)c(Oc2ccc(O)c(I)c2)c(I)c1)C(=O)O	C02465	R03953
M00044	1	1	N[C@@H](Cc1ccc(O)cc1)C(=O)O	C00082	O=C(O)C(=O)Cc1ccc(O)cc1	C01179	R00729
M00044	1	2	O=C(O)C(=O)Cc1ccc(O)cc1	C01179	O=C(O)Cc1cc(O)ccc1O	C00544	R02521
M00044	1	3	O=C(O)Cc1cc(O)ccc1O	C00544	O=C(O)/C=C\C(=O)CC(=O)CC(=O)O	C01036	R02519
M00044	1	4	O=C(O)/C=C\C(=O)CC(=O)CC(=O)O	C01036	O=C(O)/C=C/C(=O)CC(=O)CC(=O)O	C01061	R03181
M00044	1	5	O=C(O)/C=C/C(=O)CC(=O)CC(=O)O	C01061	CC(=O)CC(=O)O	C00164	R01364
M00045	1	1	N[C@@H](Cc1c[nH]cn1)C(=O)O	C00135	O=C(O)/C=C/c1c[nH]cn1	C00785	R01168
M00045	1	2	O=C(O)/C=C/c1c[nH]cn1	C00785	O=C(O)CCC1NC=NC1=O	C03680	R02914
M00045	1	3	O=C(O)CCC1NC=NC1=O	C03680	N=CN[C@@H](CCC(=O)O)C(=O)O	C00439	R02288
M00045	1	4	N=CN[C@@H](CCC(=O)O)C(=O)O	C00439	N[C@@H](CCC(=O)O)C(=O)O	C00025	R02285
M00047	1	1	N=C(N)NCCC[C@H](N)C(=O)O	C00062	N=C(N)NCC(=O)O	C00581	R00565
M00047	1	2	N=C(N)NCC(=O)O	C00581	CN(CC(=O)O)C(=N)N	C00300	R01883
M00047	1	3	CN(CC(=O)O)C(=N)N	C00300	CN(CC(=O)O)C(=N)NP(=O)(O)O	C02305	R01881
M00047	1	4	CN(CC(=O)O)C(=N)NP(=O)(O)O	C02305	CN1CC(=O)NC1=N	C00791	R07420
M00048	1	1	NC(=O)CC[C@H](N)C(=O)O	C00064	N[C@@H]1O[C@H](COP(=O)(O)O)[C@@H](O)[C@H]1O	C03090	R01072
M00048	1	2	N[C@@H]1O[C@H](COP(=O)(O)O)[C@@H](O)[C@H]1O	C03090	NCC(=O)N[C@@H]1O[C@H](COP(=O)(O)O)[C@@H](O)[C@H]1O	C03838	R04144
M00048	1	3	NCC(=O)N[C@@H]1O[C@H](COP(=O)(O)O)[C@@H](O)[C@H]1O	C03838	O=CNCC(=O)N[C@@H]1O[C@H](COP(=O)(O)O)[C@@H](O)[C@H]1O	C04376	R04325
M00048	1	4	O=CNCC(=O)N[C@@H]1O[C@H](COP(=O)(O)O)[C@@H](O)[C@H]1O	C04376	N=C(CNC=O)N[C@@H]1O[C@H](COP(=O)(O)O)[C@@H](O)[C@H]1O	C04640	R04463
M00048	1	5	N=C(CNC=O)N[C@@H]1O[C@H](COP(=O)(O)O)[C@@H](O)[C@H]1O	C04640	Nc1cncn1[C@@H]1O[C@H](COP(=O)(O)O)[C@@H](O)[C@H]1O	C03373	R04208
M00048	2	1	Nc1cncn1[C@@H]1O[C@H](COP(=O)(O)O)[C@@H](O)[C@H]1O	C03373	Nc1c(C(=O)O)ncn1[C@@H]1O[C@H](COP(=O)(O)O)[C@@H](O)[C@H]1O	C04751	R04209
M00048	2	2	Nc1c(C(=O)O)ncn1[C@@H]1O[C@H](COP(=O)(O)O)[C@@H](O)[C@H]1O	C04751	Nc1c(C(=O)N[C@@H](CC(=O)O)C(=O)O)ncn1[C@@H]1O[C@H](COP(=O)(O)O)[C@@H](O)[C@H]1O	C04823	R04591
M00048	2	3	Nc1c(C(=O)N[C@@H](CC(=O)O)C(=O)O)ncn1[C@@H]1O[C@H](COP(=O)(O)O)[C@@H](O)[C@H]1O	C04823	NC(=O)c1ncn([C@@H]2O[C@H](COP(=O)(O)O)[C@@H](O)[C@H]2O)c1N	C04677	R04559
M00048	2	4	NC(=O)c1ncn([C@@H]2O[C@H](COP(=O)(O)O)[C@@H](O)[C@H]2O)c1N	C04677	NC(=O)c1ncn([C@@H]2O[C@H](COP(=O)(O)O)[C@@H](O)[C@H]2O)c1NC=O	C04734	R04560;R06975
M00048	2	5	NC(=O)c1ncn([C@@H]2O[C@H](COP(=O)(O)O)[C@@H](O)[C@H]2O)c1NC=O	C04734	O=c1[nH]cnc2c1ncn2[C@@H]1O[C@H](COP(=O)(O)O)[C@@H](O)[C@H]1O	C00130	R01127
M00049	1	1	O=c1[nH]cnc2c1ncn2[C@@H]1O[C@H](COP(=O)(O)O)[C@@H](O)[C@H]1O	C00130	O=C(O)C[C@H](Nc1ncnc2c1ncn2[C@@H]1O[C@H](COP(=O)(O)O)[C@@H](O)[C@H]1O)C(=O)O	C03794	R01135
M00049	1	2	O=C(O)C[C@H](Nc1ncnc2c1ncn2[C@@H]1O[C@H](COP(=O)(O)O)[C@@H](O)[C@H]1O)C(=O)O	C03794	Nc1ncnc2c1ncn2[C@@H]1O[C@H](COP(=O)(O)O)[C@@H](O)[C@H]1O	C00020	R01083
M00049	1	3	Nc1ncnc2c1ncn2[C@@H]1O[C@H](COP(=O)(O)O)[C@@H](O)[C@H]1O	C00020	Nc1ncnc2c1ncn2[C@@H]1O[C@H](COP(=O)(O)OP(=O)(O)O)[C@@H](O)[C@H]1O	C00008	R00127;R00333
M00049	1	4	Nc1ncnc2c1ncn2[C@@H]1O[C@H](COP(=O)(O)OP(=O)(O)O)[C@@H](O)[C@H]1O	C00008	Nc1ncnc2c1ncn2[C@@H]1O[C@H](COP(=O)(O)OP(=O)(O)OP(=O)(O)O)[C@@H](O)[C@H]1O	C00002	R00124;R00200
M00050	1	1	O=c1[nH]cnc2c1ncn2[C@@H]1O[C@H](COP(=O)(O)O)[C@@H](O)[C@H]1O	C00130	O=c1[nH]c(=O)c2ncn([C@@H]3O[C@H](COP(=O)(O)O)[C@@H](O)[C@H]3O)c2[nH]1	C00655	R01130
M00050	1	2	O=c1[nH]c(=O)c2ncn([C@@H]3O[C@H](COP(=O)(O)O)[C@@H](O)[C@H]3O)c2[nH]1	C00655	Nc1nc2c(ncn2[C@@H]2O[C@H](COP(=O)(O)O)[C@@H](O)[C@H]2O)c(=O)[nH]1	C00144	R01230;R01231
M00050	1	3	Nc1nc2c(ncn2[C@@H]2O[C@H](COP(=O)(O)O)[C@@H](O)[C@H]2O)c(=O)[nH]1	C00144	Nc1nc2c(ncn2[C@@H]2O[C@H](COP(=O)(O)OP(=O)(O)O)[C@@H](O)[C@H]2O)c(=O)[nH]1	C00035	R00332
M00050	1	4	Nc1nc2c(ncn2[C@@H]2O[C@H](COP(=O)(O)OP(=O)(O)O)[C@@H](O)[C@H]2O)c(=O)[nH]1	C00035	Nc1nc2c(ncn2[C@@H]2O[C@H](COP(=O)(O)OP(=O)(O)OP(=O)(O)O)[C@@H](O)[C@H]2O)c(=O)[nH]1	C00044	R00330;R00430
M00051	1	1	NC(=O)CC[C@H](N)C(=O)O	C00064	NC(=O)OP(=O)(O)O	C00169	R00575
M00051	1	2	NC(=O)OP(=O)(O)O	C00169	NC(=O)N[C@@H](CC(=O)O)C(=O)O	C00438	R01397
M00051	1	3	NC(=O)N[C@@H](CC(=O)O)C(=O)O	C00438	O=C1C[C@@H](C(=O)O)NC(=O)N1	C00337	R01993
M00051	1	4	O=C1C[C@@H](C(=O)O)NC(=O)N1	C00337	O=C(O)c1cc(=O)[nH]c(=O)[nH]1	C00295	R01867;R01868;R01869
M00051	1	5	O=C(O)c1cc(=O)[nH]c(=O)[nH]1	C00295	O=C(O)c1cc(=O)[nH]c(=O)n1[C@@H]1O[C@H](COP(=O)(O)O)[C@@H](O)[C@H]1O	C01103	R01870
M00051	2	1	NC(=O)OP(=O)(O)O	C00169	NC(=O)N[C@@H](CC(=O)O)C(=O)O	C00438	R01397
M00051	2	2	NC(=O)N[C@@H](CC(=O)O)C(=O)O	C00438	O=C1C[C@@H](C(=O)O)NC(=O)N1	C00337	R01993
M00051	2	3	O=C1C[C@@H](C(=O)O)NC(=O)N1	C00337	O=C(O)c1cc(=O)[nH]c(=O)[nH]1	C00295	R01867;R01868;R01869
M00051	2	4	O=C(O)c1cc(=O)[nH]c(=O)[nH]1	C00295	O=C(O)c1cc(=O)[nH]c(=O)n1[C@@H]1O[C@H](COP(=O)(O)O)[C@@H](O)[C@H]1O	C01103	R01870
M00051	2	5	O=C(O)c1cc(=O)[nH]c(=O)n1[C@@H]1O[C@H](COP(=O)(O)O)[C@@H](O)[C@H]1O	C01103	O=c1ccn([C@@H]2O[C@H](COP(=O)(O)O)[C@@H](O)[C@H]2O)c(=O)[nH]1	C00105	R00965
M00052	1	1	O=c1ccn([C@@H]2O[C@H](COP(=O)(O)O)[C@@H](O)[C@H]2O)c(=O)[nH]1	C00105	O=c1ccn([C@@H]2O[C@H](COP(=O)(O)OP(=O)(O)O)[C@@H](O)[C@H]2O)c(=O)[nH]1	C00015	R00158
M00052	1	2	O=c1ccn([C@@H]2O[C@H](COP(=O)(O)OP(=O)(O)O)[C@@H](O)[C@H]2O)c(=O)[nH]1	C00015	O=c1ccn([C@@H]2O[C@H](COP(=O)(O)OP(=O)(O)OP(=O)(O)O)[C@@H](O)[C@H]2O)c(=O)[nH]1	C00075	R00156
M00052	1	3	O=c1ccn([C@@H]2O[C@H](COP(=O)(O)OP(=O)(O)OP(=O)(O)O)[C@@H](O)[C@H]2O)c(=O)[nH]1	C00075	Nc1ccn([C@@H]2O[C@H](COP(=O)(O)OP(=O)(O)OP(=O)(O)O)[C@@H](O)[C@H]2O)c(=O)n1	C00063	R00571;R00573
M00052	1	4	Nc1ccn([C@@H]2O[C@H](COP(=O)(O)OP(=O)(O)OP(=O)(O)O)[C@@H](O)[C@H]2O)c(=O)n1	C00063	Nc1ccn([C@@H]2O[C@H](COP(=O)(O)OP(=O)(O)O)[C@@H](O)[C@H]2O)c(=O)n1	C00112	R00570
M00053	1	1	Nc1ccn([C@H]2C[C@H](O)[C@@H](COP(=O)(O)OP(=O)(O)O)O2)c(=O)n1	C00705	Nc1ccn([C@H]2C[C@H](O)[C@@H](COP(=O)(O)OP(=O)(O)OP(=O)(O)O)O2)c(=O)n1	C00458	R02326
M00053	1	2	Nc1ccn([C@H]2C[C@H](O)[C@@H](COP(=O)(O)OP(=O)(O)OP(=O)(O)O)O2)c(=O)n1	C00458	O=c1ccn([C@H]2C[C@H](O)[C@@H](COP(=O)(O)OP(=O)(O)OP(=O)(O)O)O2)c(=O)[nH]1	C00460	R02325
M00053	1	3	O=c1ccn([C@H]2C[C@H](O)[C@@H](COP(=O)(O)OP(=O)(O)OP(=O)(O)O)O2)c(=O)[nH]1	C00460	O=c1ccn([C@H]2C[C@H](O)[C@@H](COP(=O)(O)O)O2)c(=O)[nH]1	C00365	R02100
M00053	1	4	O=c1ccn([C@H]2C[C@H](O)[C@@H](COP(=O)(O)O)O2)c(=O)[nH]1	C00365	Cc1cn([C@H]2C[C@H](O)[C@@H](COP(=O)(O)O)O2)c(=O)[nH]c1=O	C00364	R02101
M00053	1	5	Cc1cn([C@H]2C[C@H](O)[C@@H](COP(=O)(O)O)O2)c(=O)[nH]c1=O	C00364	Cc1cn([C@H]2C[C@H](O)[C@@H](COP(=O)(O)OP(=O)(O)O)O2)c(=O)[nH]c1=O	C00363	R02094
M00053	2	1	Nc1ccn([C@H]2C[C@H](O)[C@@H](COP(=O)(O)OP(=O)(O)OP(=O)(O)O)O2)c(=O)n1	C00458	O=c1ccn([C@H]2C[C@H](O)[C@@H](COP(=O)(O)OP(=O)(O)OP(=O)(O)O)O2)c(=O)[nH]1	C00460	R02325
M00053	2	2	O=c1ccn([C@H]2C[C@H](O)[C@@H](COP(=O)(O)OP(=O)(O)OP(=O)(O)O)O2)c(=O)[nH]1	C00460	O=c1ccn([C@H]2C[C@H](O)[C@@H](COP(=O)(O)O)O2)c(=O)[nH]1	C00365	R02100
M00053	2	3	O=c1ccn([C@H]2C[C@H](O)[C@@H](COP(=O)(O)O)O2)c(=O)[nH]1	C00365	Cc1cn([C@H]2C[C@H](O)[C@@H](COP(=O)(O)O)O2)c(=O)[nH]c1=O	C00364	R02101
M00053	2	4	Cc1cn([C@H]2C[C@H](O)[C@@H](COP(=O)(O)O)O2)c(=O)[nH]c1=O	C00364	Cc1cn([C@H]2C[C@H](O)[C@@H](COP(=O)(O)OP(=O)(O)O)O2)c(=O)[nH]c1=O	C00363	R02094
M00053	2	5	Cc1cn([C@H]2C[C@H](O)[C@@H](COP(=O)(O)OP(=O)(O)O)O2)c(=O)[nH]c1=O	C00363	Cc1cn([C@H]2C[C@H](O)[C@@H](COP(=O)(O)OP(=O)(O)OP(=O)(O)O)O2)c(=O)[nH]c1=O	C00459	R02093
M00060	1	1	CCCCCCCCCCC[C@@H](O)CC(=O)O[C@H]1[C@H](O)[C@@H](CO)O[C@H](OP(=O)(O)OP(=O)(O)OC[C@H]2O[C@@H](n3ccc(=O)[nH]c3=O)[C@H](O)[C@@H]2O)[C@@H]1NC(C)=O	C04738	CCCCCCCCCCC[C@@H](O)CC(=O)O[C@H]1[C@H](O)[C@@H](CO)O[C@H](OP(=O)(O)OP(=O)(O)OC[C@H]2O[C@@H](n3ccc(=O)[nH]c3=O)[C@H](O)[C@@H]2O)[C@@H]1N	C06022	R04587
M00060	2	1	CCCCCCCCCCC[C@@H](O)CC(=O)N[C@H]1[C@@H](OP(=O)(O)OP(=O)(O)OC[C@H]2O[C@@H](n3ccc(=O)[nH]c3=O)[C@H](O)[C@@H]2O)O[C@H](CO)[C@@H](O)[C@@H]1OC(=O)C[C@H](O)CCCCCCCCCCC	C04652	CCCCCCCCCCC[C@@H](O)CC(=O)N[C@H]1[C@@H](OP(=O)(O)O)O[C@H](CO)[C@@H](O)[C@@H]1OC(=O)C[C@H](O)CCCCCCCCCCC	C04824	R04549
M00060	2	2	CCCCCCCCCCC[C@@H](O)CC(=O)N[C@H]1[C@@H](OP(=O)(O)O)O[C@H](CO)[C@@H](O)[C@@H]1OC(=O)C[C@H](O)CCCCCCCCCCC	C04824	CCCCCCCCCCC[C@@H](O)CC(=O)N[C@H]1[C@H](OC[C@H]2O[C@H](OP(=O)(O)O)[C@H](NC(=O)C[C@H](O)CCCCCCCCCCC)[C@@H](OC(=O)C[C@H](O)CCCCCCCCCCC)[C@@H]2O)O[C@H](CO)[C@@H](O)[C@@H]1OC(=O)C[C@H](O)CCCCCCCCCCC	C04932	R04606
M00060	3	1	CCCCCCCCCCC[C@@H](O)CC(=O)N[C@H]1[C@@H](OP(=O)(O)O)O[C@H](CO[C@@H]2O[C@H](CO)[C@@H](OP(=O)(O)O)[C@H](OC(=O)C[C@H](O)CCCCCCCCCCC)[C@H]2NC(=O)C[C@H](O)CCCCCCCCCCC)[C@@H](O)[C@@H]1OC(=O)C[C@H](O)CCCCCCCCCCC	C04919	CCCCCCCCCCC[C@@H](O)CC(=O)N[C@H]1[C@@H](OP(=O)(O)O)O[C@H](CO[C@@H]2O[C@H](CO[C@]3(C(=O)O)C[C@@H](O)[C@@H](O)[C@@H]([C@H](O)CO)O3)[C@@H](OP(=O)(O)O)[C@H](OC(=O)C[C@H](O)CCCCCCCCCCC)[C@H]2NC(=O)C[C@H](O)CCCCCCCCCCC)[C@@H](O)[C@@H]1OC(=O)C[C@H](O)CCCCCCCCCCC	C06024	R04658
M00060	3	2	CCCCCCCCCCC[C@@H](O)CC(=O)N[C@H]1[C@@H](OP(=O)(O)O)O[C@H](CO[C@@H]2O[C@H](CO[C@]3(C(=O)O)C[C@@H](O)[C@@H](O)[C@@H]([C@H](O)CO)O3)[C@@H](OP(=O)(O)O)[C@H](OC(=O)C[C@H](O)CCCCCCCCCCC)[C@H]2NC(=O)C[C@H](O)CCCCCCCCCCC)[C@@H](O)[C@@H]1OC(=O)C[C@H](O)CCCCCCCCCCC	C06024	CCCCCCCCCCC[C@@H](O)CC(=O)N[C@H]1[C@@H](OP(=O)(O)O)O[C@H](CO[C@@H]2O[C@H](CO[C@]3(C(=O)O)C[C@@H](O[C@]4(C(=O)O)C[C@@H](O)[C@@H](O)[C@@H]([C@H](O)CO)O4)[C@@H](O)[C@@H]([C@H](O)CO)O3)[C@@H](OP(=O)(O)O)[C@H](OC(=O)C[C@H](O)CCCCCCCCCCC)[C@H]2NC(=O)C[C@H](O)CCCCCCCCCCC)[C@@H](O)[C@@H]1OC(=O)C[C@H](O)CCCCCCCCCCC	C06025	R05074
M00061	1	1	O=C(O)[C@H]1OC(O)[C@H](O)[C@@H](O)[C@@H]1O	C00191	O=C(O)[C@H]1OC(O)(CO)[C@@H](O)[C@@H]1O	C00905	R01482
M00061	1	2	O=C(O)[C@H]1OC(O)(CO)[C@@H](O)[C@@H]1O	C00905	O=C(O)[C@@H](O)[C@@H](O)[C@H](O)[C@H](O)CO	C00514	R02454
M00061	1	3	O=C(O)[C@@H](O)[C@@H](O)[C@H](O)[C@H](O)CO	C00514	O=C(O)C(=O)C[C@H](O)[C@H](O)CO	C00204	R05606
M00061	1	4	O=C(O)C(=O)C[C@H](O)[C@H](O)CO	C00204	O=C(O)C(=O)C[C@H](O)[C@H](O)COP(=O)(O)O	C04442	R01541
M00061	1	5	O=C(O)C(=O)C[C@H](O)[C@H](O)COP(=O)(O)O	C04442	O=C[C@H](O)COP(=O)(O)O	C00118	R05605
M00063	1	1	O=C(CO)[C@H](O)[C@H](O)COP(=O)(O)O	C00199	O=C[C@@H](O)[C@H](O)[C@H](O)COP(=O)(O)O	C01112	R01530
M00063	1	2	O=C[C@@H](O)[C@H](O)[C@H](O)COP(=O)(O)O	C01112	O=C(O)C(=O)C[C@@H](O)[C@@H](O)[C@H](O)[C@H](O)COP(=O)(O)O	C04478	R03254
M00063	1	3	O=C(O)C(=O)C[C@@H](O)[C@@H](O)[C@H](O)[C@H](O)COP(=O)(O)O	C04478	O=C(O)C(=O)C[C@@H](O)[C@@H](O)[C@H](O)[C@H](O)CO	C01187	R03350
M00063	1	4	O=C(O)C(=O)C[C@@H](O)[C@@H](O)[C@H](O)[C@H](O)CO	C01187	Nc1ccn([C@@H]2O[C@H](COP(=O)(O)O[C@@]3(C(=O)O)C[C@@H](O)[C@@H](O)[C@@H]([C@H](O)CO)O3)[C@@H](O)[C@H]2O)c(=O)n1	C04121	R03351
M00064	1	1	O=C(CO)[C@@H](O)[C@H](O)[C@H](O)[C@H](O)COP(=O)(O)O	C05382	O=P(O)(O)OC[C@@H](O)[C@H]1O[C@@H](O)[C@@H](O)[C@@H](O)[C@@H]1O	C07836	R05645
M00064	1	2	O=P(O)(O)OC[C@@H](O)[C@H]1O[C@@H](O)[C@@H](O)[C@@H](O)[C@@H]1O	C07836	O=P(O)(O)OC[C@@H](O)[C@H]1O[C@@H](OP(=O)(O)O)[C@@H](O)[C@@H](O)[C@@H]1O	C11472	R05646
M00064	1	3	O=P(O)(O)OC[C@@H](O)[C@H]1O[C@@H](OP(=O)(O)O)[C@@H](O)[C@@H](O)[C@@H]1O	C11472	O=P(O)(O)O[C@@H]1O[C@H]([C@H](O)CO)[C@@H](O)[C@H](O)[C@@H]1O	C07838	R05647
M00064	1	4	O=P(O)(O)O[C@@H]1O[C@H]([C@H](O)CO)[C@@H](O)[C@H](O)[C@@H]1O	C07838	Nc1ncnc2c1ncn2[C@@H]1O[C@H](COP(=O)(O)OP(=O)(O)O[C@@H]2O[C@H]([C@H](O)CO)[C@@H](O)[C@H](O)[C@@H]2O)[C@@H](O)[C@H]1O	C06397	R05644
M00064	1	5	Nc1ncnc2c1ncn2[C@@H]1O[C@H](COP(=O)(O)OP(=O)(O)O[C@@H]2O[C@H]([C@H](O)CO)[C@@H](O)[C@H](O)[C@@H]2O)[C@@H](O)[C@H]1O	C06397	Nc1ncnc2c1ncn2[C@@H]1O[C@H](COP(=O)(O)OP(=O)(O)O[C@@H]2O[C@H]([C@@H](O)CO)[C@@H](O)[C@H](O)[C@@H]2O)[C@@H](O)[C@H]1O	C06398	R05176
M00082	1	1	CC(=O)SCCNC(=O)CCNC(=O)[C@H](O)C(C)(C)COP(=O)(O)OP(=O)(O)OC[C@H]1O[C@@H](n2cnc3c(N)ncnc32)[C@H](O)[C@@H]1OP(=O)(O)O	C00024	CC(C)(COP(=O)(O)OP(=O)(O)OC[C@H]1O[C@@H](n2cnc3c(N)ncnc32)[C@H](O)[C@@H]1OP(=O)(O)O)[C@@H](O)C(=O)NCCC(=O)NCCSC(=O)CC(=O)O	C00083	R00742
M00086	1	1	CCCCCCCCCCCCCCCC(=O)O	C00249	CCCCCCCCCCCCCCCC(=O)SCCNC(=O)CCNC(=O)[C@H](O)C(C)(C)COP(=O)(O)OP(=O)(O)OC[C@H]1O[C@@H](n2cnc3c(N)ncnc32)[C@H](O)[C@@H]1OP(=O)(O)O	C00154	R01280
M00087	1	1	CCCCCCCCCCCCCCCC(=O)SCCNC(=O)CCNC(=O)[C@H](O)C(C)(C)COP(=O)(O)OP(=O)(O)OC[C@H]1O[C@@H](n2cnc3c(N)ncnc32)[C@H](O)[C@@H]1OP(=O)(O)O	C00154	CCCCCCCCCCCCC/C=C/C(=O)SCCNC(=O)CCNC(=O)[C@H](O)C(C)(C)COP(=O)(O)OP(=O)(O)OC[C@H]1O[C@@H](n2cnc3c(N)ncnc32)[C@H](O)[C@@H]1OP(=O)(O)O	C05272	R01279
M00087	1	2	CCCCCCCCCCCCC/C=C/C(=O)SCCNC(=O)CCNC(=O)[C@H](O)C(C)(C)COP(=O)(O)OP(=O)(O)OC[C@H]1O[C@@H](n2cnc3c(N)ncnc32)[C@H](O)[C@@H]1OP(=O)(O)O	C05272	CCCCCCCCCCCCC[C@H](O)CC(=O)SCCNC(=O)CCNC(=O)[C@H](O)C(C)(C)COP(=O)(O)OP(=O)(O)OC[C@H]1O[C@@H](n2cnc3c(N)ncnc32)[C@H](O)[C@@H]1OP(=O)(O)O	C05258	R04738
M00087	1	3	CCCCCCCCCCCCC[C@H](O)CC(=O)SCCNC(=O)CCNC(=O)[C@H](O)C(C)(C)COP(=O)(O)OP(=O)(O)OC[C@H]1O[C@@H](n2cnc3c(N)ncnc32)[C@H](O)[C@@H]1OP(=O)(O)O	C05258	CCCCCCCCCCCCCC(=O)CC(=O)SCCNC(=O)CCNC(=O)[C@H](O)C(C)(C)COP(=O)(O)OP(=O)(O)OC[C@H]1O[C@@H](n2cnc3c(N)ncnc32)[C@H](O)[C@@H]1OP(=O)(O)O	C05259	R04737
M00087	1	4	CCCCCCCCCCCCCC(=O)CC(=O)SCCNC(=O)CCNC(=O)[C@H](O)C(C)(C)COP(=O)(O)OP(=O)(O)OC[C@H]1O[C@@H](n2cnc3c(N)ncnc32)[C@H](O)[C@@H]1OP(=O)(O)O	C05259	CCCCCCCCCCCCCC(=O)SCCNC(=O)CCNC(=O)[C@H](O)C(C)(C)COP(=O)(O)OP(=O)(O)OC[C@H]1O[C@@H](n2cnc3c(N)ncnc32)[C@H](O)[C@@H]1OP(=O)(O)O	C02593	R03991
M00088	1	1	CC(=O)SCCNC(=O)CCNC(=O)[C@H](O)C(C)(C)COP(=O)(O)OP(=O)(O)OC[C@H]1O[C@@H](n2cnc3c(N)ncnc32)[C@H](O)[C@@H]1OP(=O)(O)O	C00024	CC(=O)CC(=O)SCCNC(=O)CCNC(=O)[C@H](O)C(C)(C)COP(=O)(O)OP(=O)(O)OC[C@H]1O[C@@H](n2cnc3c(N)ncnc32)[C@H](O)[C@@H]1OP(=O)(O)O	C00332	R00238
M00088	1	2	CC(=O)CC(=O)SCCNC(=O)CCNC(=O)[C@H](O)C(C)(C)COP(=O)(O)OP(=O)(O)OC[C@H]1O[C@@H](n2cnc3c(N)ncnc32)[C@H](O)[C@@H]1OP(=O)(O)O	C00332	CC(C)(COP(=O)(O)OP(=O)(O)OC[C@H]1O[C@@H](n2cnc3c(N)ncnc32)[C@H](O)[C@@H]1OP(=O)(O)O)[C@@H](O)C(=O)NCCC(=O)NCCSC(=O)C[C@@](C)(O)CC(=O)O	C00356	R01978
M00088	1	3	CC(C)(COP(=O)(O)OP(=O)(O)OC[C@H]1O[C@@H](n2cnc3c(N)ncnc32)[C@H](O)[C@@H]1OP(=O)(O)O)[C@@H](O)C(=O)NCCC(=O)NCCSC(=O)C[C@@](C)(O)CC(=O)O	C00356	CC(=O)CC(=O)O	C00164	R01360
M00088	1	4	CC(=O)CC(=O)O	C00164	CC(C)=O	C00207	R01366
M00090	1	1	C[N+](C)(C)CCO	C00114	C[N+](C)(C)CCOP(=O)(O)O	C00588	R01021
M00090	1	2	C[N+](C)(C)CCOP(=O)(O)O	C00588	C[N+](C)(C)CCOP(=O)([O-])OP(=O)(O)OC[C@H]1O[C@@H](n2ccc(N)nc2=O)[C@H](O)[C@@H]1O	C00307	R01890
M00092	1	1	NCCO	C00189	NCCOP(=O)(O)O	C00346	R01468
M00092	1	2	NCCOP(=O)(O)O	C00346	NCCOP(=O)(O)OP(=O)(O)OC[C@H]1O[C@@H](n2ccc(N)nc2=O)[C@H](O)[C@@H]1O	C00570	R02038
M00094	1	1	N[C@@H](CO)C(=O)O	C00065	CCCCCCCCCCCCCCCC(=O)[C@@H](N)CO	C02934	R01281
M00094	1	2	CCCCCCCCCCCCCCCC(=O)[C@@H](N)CO	C02934	CCCCCCCCCCCCCCC[C@@H](O)[C@@H](N)CO	C00836	R02978
M00095	1	1	CC(=O)SCCNC(=O)CCNC(=O)[C@H](O)C(C)(C)COP(=O)(O)OP(=O)(O)OC[C@H]1O[C@@H](n2cnc3c(N)ncnc32)[C@H](O)[C@@H]1OP(=O)(O)O	C00024	CC(=O)CC(=O)SCCNC(=O)CCNC(=O)[C@H](O)C(C)(C)COP(=O)(O)OP(=O)(O)OC[C@H]1O[C@@H](n2cnc3c(N)ncnc32)[C@H](O)[C@@H]1OP(=O)(O)O	C00332	R00238
M00095	1	2	CC(=O)CC(=O)SCCNC(=O)CCNC(=O)[C@H](O)C(C)(C)COP(=O)(O)OP(=O)(O)OC[C@H]1O[C@@H](n2cnc3c(N)ncnc32)[C@H](O)[C@@H]1OP(=O)(O)O	C00332	CC(C)(COP(=O)(O)OP(=O)(O)OC[C@H]1O[C@@H](n2cnc3c(N)ncnc32)[C@H](O)[C@@H]1OP(=O)(O)O)[C@@H](O)C(=O)NCCC(=O)NCCSC(=O)C[C@@](C)(O)CC(=O)O	C00356	R01978
M00095	1	3	CC(C)(COP(=O)(O)OP(=O)(O)OC[C@H]1O[C@@H](n2cnc3c(N)ncnc32)[C@H](O)[C@@H]1OP(=O)(O)O)[C@@H](O)C(=O)NCCC(=O)NCCSC(=O)C[C@@](C)(O)CC(=O)O	C00356	C[C@@](O)(CCO)CC(=O)O	C00418	R02082
M00095	1	4	C[C@@](O)(CCO)CC(=O)O	C00418	C[C@@](O)(CCOP(=O)(O)O)CC(=O)O	C01107	R02245
M00095	1	5	C[C@@](O)(CCOP(=O)(O)O)CC(=O)O	C01107	C[C@@](O)(CCOP(=O)(O)OP(=O)(O)O)CC(=O)O	C01143	R03245
M00095	2	1	CC(C)(COP(=O)(O)OP(=O)(O)OC[C@H]1O[C@@H](n2cnc3c(N)ncnc32)[C@H](O)[C@@H]1OP(=O)(O)O)[C@@H](O)C(=O)NCCC(=O)NCCSC(=O)C[C@@](C)(O)CC(=O)O	C00356	C[C@@](O)(CCO)CC(=O)O	C00418	R02082
M00095	2	2	C[C@@](O)(CCO)CC(=O)O	C00418	C[C@@](O)(CCOP(=O)(O)O)CC(=O)O	C01107	R02245
M00095	2	3	C[C@@](O)(CCOP(=O)(O)O)CC(=O)O	C01107	C[C@@](O)(CCOP(=O)(O)OP(=O)(O)O)CC(=O)O	C01143	R03245
M00095	2	4	C[C@@](O)(CCOP(=O)(O)OP(=O)(O)O)CC(=O)O	C01143	C=C(C)CCOP(=O)(O)OP(=O)(O)O	C00129	R01121
M00095	2	5	C=C(C)CCOP(=O)(O)OP(=O)(O)O	C00129	CC(C)=CCOP(=O)(O)OP(=O)(O)O	C00235	R01123
M00096	1	1	CC(=O)C(=O)O	C00022	CC(=O)[C@@H](O)[C@H](O)COP(=O)(O)O	C11437	R05636
M00096	1	2	CC(=O)[C@@H](O)[C@H](O)COP(=O)(O)O	C11437	C[C@](O)(CO)[C@H](O)COP(=O)(O)O	C11434	R05688
M00096	1	3	C[C@](O)(CO)[C@H](O)COP(=O)(O)O	C11434	C[C@](O)(CO)[C@H](O)COP(=O)(O)OP(=O)(O)OC[C@H]1O[C@@H](n2ccc(N)nc2=O)[C@H](O)[C@@H]1O	C11435	R05633
M00096	1	4	C[C@](O)(CO)[C@H](O)COP(=O)(O)OP(=O)(O)OC[C@H]1O[C@@H](n2ccc(N)nc2=O)[C@H](O)[C@@H]1O	C11435	C[C@@](CO)(OP(=O)(O)O)[C@H](O)COP(=O)(O)OP(=O)(O)OC[C@H]1O[C@@H](n2ccc(N)nc2=O)[C@H](O)[C@@H]1O	C11436	R05634
M00096	1	5	C[C@@](CO)(OP(=O)(O)O)[C@H](O)COP(=O)(O)OP(=O)(O)OC[C@H]1O[C@@H](n2ccc(N)nc2=O)[C@H](O)[C@@H]1O	C11436	C[C@@]1(CO)OP(=O)(O)OP(=O)(O)OC[C@H]1O	C11453	R05637
M00096	2	1	C[C@](O)(CO)[C@H](O)COP(=O)(O)OP(=O)(O)OC[C@H]1O[C@@H](n2ccc(N)nc2=O)[C@H](O)[C@@H]1O	C11435	C[C@@](CO)(OP(=O)(O)O)[C@H](O)COP(=O)(O)OP(=O)(O)OC[C@H]1O[C@@H](n2ccc(N)nc2=O)[C@H](O)[C@@H]1O	C11436	R05634
M00096	2	2	C[C@@](CO)(OP(=O)(O)O)[C@H](O)COP(=O)(O)OP(=O)(O)OC[C@H]1O[C@@H](n2ccc(N)nc2=O)[C@H](O)[C@@H]1O	C11436	C[C@@]1(CO)OP(=O)(O)OP(=O)(O)OC[C@H]1O	C11453	R05637
M00096	2	3	C[C@@]1(CO)OP(=O)(O)OP(=O)(O)OC[C@H]1O	C11453	C/C(=C\COP(=O)(O)OP(=O)(O)O)CO	C11811	R08689;R10859
M00096	2	4	C/C(=C\COP(=O)(O)OP(=O)(O)O)CO	C11811	C=C(C)CCOP(=O)(O)OP(=O)(O)O	C00129	R05884
M00096	2	5	C=C(C)CCOP(=O)(O)OP(=O)(O)O	C00129	CC(C)=CCOP(=O)(O)OP(=O)(O)O	C00235	R01123
M00097	1	1	CC(C)=CCC/C(C)=C/CC/C(C)=C/CC/C(C)=C/COP(=O)(O)OP(=O)(O)O	C00353	CC(C)=CCC/C(C)=C/CC/C(C)=C/CC/C(C)=C/[C@@H]1[C@@H](COP(=O)(O)OP(=O)(O)O)[C@]1(C)CC/C=C(\C)CC/C=C(\C)CCC=C(C)C	C03427	R02065
M00097	1	2	CC(C)=CCC/C(C)=C/CC/C(C)=C/CC/C(C)=C/[C@@H]1[C@@H](COP(=O)(O)OP(=O)(O)O)[C@]1(C)CC/C=C(\C)CC/C=C(\C)CCC=C(C)C	C03427	CC(C)=CCC/C(C)=C/CC/C(C)=C/CC/C(C)=C/C=C\C=C(/C)CC/C=C(\C)CC/C=C(\C)CCC=C(C)C	C05421	R04218
M00097	2	1	CC(C)=CCC/C(C)=C/CC/C(C)=C\C=C\C(C)=C\C=C/C=C(C)/C=C/C=C(/C)CC/C=C(\C)CCC=C(C)C	C19764	CC(C)=CCC/C(C)=C/CC/C(C)=C\C=C\C(C)=C\C=C\C=C(C)\C=C\C=C(\C)CC/C=C(\C)CCC=C(C)C	C15857	R09655
M00097	2	2	CC(C)=CCC/C(C)=C/CC/C(C)=C\C=C\C(C)=C\C=C\C=C(C)\C=C\C=C(\C)CC/C=C(\C)CCC=C(C)C	C15857	CC(C)=CCC/C(C)=C/C=C\C(C)=C/C=C/C(C)=C/C=C/C=C(C)/C=C/C=C(/C)CC/C=C(\C)CCC=C(C)C	C19759	R09656
M00097	2	3	CC(C)=CCC/C(C)=C/C=C\C(C)=C/C=C/C(C)=C/C=C/C=C(C)/C=C/C=C(/C)CC/C=C(\C)CCC=C(C)C	C19759	CC(C)=CCC/C(C)=C/C=C\C(C)=C/C=C/C(C)=C/C=C/C=C(C)/C=C/C=C(C)\C=C/C=C(\C)CCC=C(C)C	C15858	R09658
M00097	2	4	CC(C)=CCC/C(C)=C/C=C\C(C)=C/C=C/C(C)=C/C=C/C=C(C)/C=C/C=C(C)\C=C/C=C(\C)CCC=C(C)C	C15858	CC(C)=CCC/C(C)=C/C=C/C(C)=C/C=C/C(C)=C/C=C/C=C(C)/C=C/C=C(C)/C=C/C=C(\C)CCC=C(C)C	C05432	R07512
M00099	1	1	CCCCCCCCCCCCCCCC(=O)SCCNC(=O)CCNC(=O)[C@H](O)C(C)(C)COP(=O)(O)OP(=O)(O)OC[C@H]1O[C@@H](n2cnc3c(N)ncnc32)[C@H](O)[C@@H]1OP(=O)(O)O	C00154	CCCCCCCCCCCCCCCC(=O)[C@@H](N)CO	C02934	R01281
M00099	1	2	CCCCCCCCCCCCCCCC(=O)[C@@H](N)CO	C02934	CCCCCCCCCCCCCCC[C@@H](O)[C@@H](N)CO	C00836	R02978
M00100	1	1	CCCCCCCCCCCCC/C=C/[C@@H](O)[C@@H](N)CO	C00319	CCCCCCCCCCCCC/C=C/[C@@H](O)[C@@H](N)COP(=O)(O)O	C06124	R01926
M00100	1	2	CCCCCCCCCCCCC/C=C/[C@@H](O)[C@@H](N)COP(=O)(O)O	C06124	NCCOP(=O)(O)O	C00346	R06516
M00101	1	1	CC(C)=CCC/C(C)=C/CC/C(C)=C/CC/C=C(\C)CC/C=C(\C)CC[C@@H]1OC1(C)C	C01054	CC(C)=CCC[C@@H](C)[C@H]1CC[C@@]2(C)C3=C(CC[C@]12C)[C@@]1(C)CC[C@H](O)C(C)(C)[C@@H]1CC3	C01724	R03199
M00101	1	2	CC(C)=CCC[C@@H](C)[C@H]1CC[C@@]2(C)C3=C(CC[C@]12C)[C@@]1(C)CC[C@H](O)C(C)(C)[C@@H]1CC3	C01724	CC(C)=CCC[C@@H](C)[C@H]1CC=C2C3=C(CC[C@@]21C)[C@@]1(C)CC[C@H](O)C(C)(C)[C@@H]1CC3	C11455	R05640
M00101	1	3	CC(C)=CCC[C@@H](C)[C@H]1CC=C2C3=C(CC[C@@]21C)[C@@]1(C)CC[C@H](O)C(C)(C)[C@@H]1CC3	C11455	CC(C)=CCC[C@@H](C)[C@H]1CC[C@H]2C3=C(CC[C@@]21C)[C@@]1(C)CC[C@H](O)C(C)(C)[C@@H]1CC3	C05108	R05639
M00101	2	1	CC(C)=CCC[C@@H](C)[C@H]1CC[C@H]2C3=C(CC[C@@]21C)[C@@]1(C)CC[C@H](O)[C@@](C)(C(=O)O)[C@@H]1CC3	C15808	CC(C)=CCC[C@@H](C)[C@H]1CC[C@H]2C3=C(CC[C@@]21C)[C@@]1(C)CCC(=O)[C@@H](C)[C@@H]1CC3	C15816	R07494
M00101	2	2	CC(C)=CCC[C@@H](C)[C@H]1CC[C@H]2C3=C(CC[C@@]21C)[C@@]1(C)CCC(=O)[C@@H](C)[C@@H]1CC3	C15816	CC(C)=CCC[C@@H](C)[C@H]1CC[C@H]2C3=C(CC[C@@]21C)[C@@]1(C)CC[C@H](O)[C@@H](C)[C@@H]1CC3	C05103	R07495
M00101	3	1	CC(C)=CCC[C@@H](C)[C@H]1CC[C@H]2C3=C(CC[C@@]21C)[C@@]1(C)CC[C@H](O)C[C@@H]1CC3	C05437	CC(C)CCC[C@@H](C)[C@H]1CC[C@H]2C3=C(CC[C@@]21C)[C@@]1(C)CC[C@H](O)C[C@@H]1CC3	C03845	R07498
M00101	3	2	CC(C)CCC[C@@H](C)[C@H]1CC[C@H]2C3=C(CC[C@@]21C)[C@@]1(C)CC[C@H](O)C[C@@H]1CC3	C03845	CC(C)CCC[C@@H](C)[C@H]1CC[C@H]2C3=CC[C@H]4C[C@@H](O)CC[C@]4(C)[C@H]3CC[C@@]21C	C01189	R03353
M00101	3	3	CC(C)CCC[C@@H](C)[C@H]1CC[C@H]2C3=CC[C@H]4C[C@@H](O)CC[C@]4(C)[C@H]3CC[C@@]21C	C01189	CC(C)CCC[C@@H](C)[C@H]1CC[C@H]2C3=CC=C4C[C@@H](O)CC[C@]4(C)[C@H]3CC[C@@]21C	C01164	R07215
M00101	3	4	CC(C)CCC[C@@H](C)[C@H]1CC[C@H]2C3=CC=C4C[C@@H](O)CC[C@]4(C)[C@H]3CC[C@@]21C	C01164	CC(C)CCC[C@@H](C)[C@H]1CC[C@H]2[C@@H]3CC=C4C[C@@H](O)CC[C@]4(C)[C@H]3CC[C@@]21C	C00187	R01451;R01456
M00102	1	1	CC(C)=CCC[C@@H](C)[C@H]1CC[C@H]2C3=C(CC[C@@]21C)[C@@]1(C)CC[C@H](O)C[C@@H]1CC3	C05437	C=C(CC[C@@H](C)[C@H]1CC[C@H]2C3=C(CC[C@@]21C)[C@@]1(C)CC[C@H](O)C[C@@H]1CC3)C(C)C	C04525	R04427
M00102	1	2	C=C(CC[C@@H](C)[C@H]1CC[C@H]2C3=C(CC[C@@]21C)[C@@]1(C)CC[C@H](O)C[C@@H]1CC3)C(C)C	C04525	C=C(CC[C@@H](C)[C@H]1CC[C@H]2C3=CC[C@H]4C[C@@H](O)CC[C@]4(C)C3CC[C@@]21C)C(C)C	C15777	R07497
M00102	1	3	C=C(CC[C@@H](C)[C@H]1CC[C@H]2C3=CC[C@H]4C[C@@H](O)CC[C@]4(C)C3CC[C@@]21C)C(C)C	C15777	C=C(CC[C@@H](C)[C@H]1CC[C@H]2C3=CC=C4C[C@@H](O)CC[C@]4(C)C3CC[C@@]21C)C(C)C	C15778	R07505
M00102	1	4	C=C(CC[C@@H](C)[C@H]1CC[C@H]2C3=CC=C4C[C@@H](O)CC[C@]4(C)C3CC[C@@]21C)C(C)C	C15778	C=C(/C=C/[C@@H](C)[C@H]1CC[C@H]2C3=CC=C4C[C@@H](O)CC[C@]4(C)[C@H]3CC[C@@]21C)C(C)C	C05440	R07506
M00102	1	5	C=C(/C=C/[C@@H](C)[C@H]1CC[C@H]2C3=CC=C4C[C@@H](O)CC[C@]4(C)[C@H]3CC[C@@]21C)C(C)C	C05440	CC(C)[C@@H](C)/C=C/[C@@H](C)[C@H]1CC[C@H]2C3=CC=C4C[C@@H](O)CC[C@]4(C)[C@H]3CC[C@@]21C	C01694	R05641
M00102	2	1	C=C(CC[C@@H](C)[C@H]1CC[C@H]2C3=C(CC[C@@]21C)[C@@]1(C)CC[C@H](O)C[C@@H]1CC3)C(C)C	C04525	C=C(CC[C@@H](C)[C@H]1CC[C@H]2C3=CC[C@H]4C[C@@H](O)CC[C@]4(C)C3CC[C@@]21C)C(C)C	C15777	R07497
M00102	2	2	C=C(CC[C@@H](C)[C@H]1CC[C@H]2C3=CC[C@H]4C[C@@H](O)CC[C@]4(C)C3CC[C@@]21C)C(C)C	C15777	C=C(CC[C@@H](C)[C@H]1CC[C@H]2C3=CC=C4C[C@@H](O)CC[C@]4(C)C3CC[C@@]21C)C(C)C	C15778	R07505
M00102	2	3	C=C(CC[C@@H](C)[C@H]1CC[C@H]2C3=CC=C4C[C@@H](O)CC[C@]4(C)C3CC[C@@]21C)C(C)C	C15778	C=C(/C=C/[C@@H](C)[C@H]1CC[C@H]2C3=CC=C4C[C@@H](O)CC[C@]4(C)[C@H]3CC[C@@]21C)C(C)C	C05440	R07506
M00102	2	4	C=C(/C=C/[C@@H](C)[C@H]1CC[C@H]2C3=CC=C4C[C@@H](O)CC[C@]4(C)[C@H]3CC[C@@]21C)C(C)C	C05440	CC(C)[C@@H](C)/C=C/[C@@H](C)[C@H]1CC[C@H]2C3=CC=C4C[C@@H](O)CC[C@]4(C)[C@H]3CC[C@@]21C	C01694	R05641
M00102	2	5	CC(C)[C@@H](C)/C=C/[C@@H](C)[C@H]1CC[C@H]2C3=CC=C4C[C@@H](O)CC[C@]4(C)[C@H]3CC[C@@]21C	C01694	C=C1CC[C@H](O)C/C1=C/C=C1\CCC[C@@]2(C)[C@H]1CC[C@@H]2[C@H](C)/C=C/[C@H](C)C(C)C	C05441	R03677
M00103	1	1	CC(C)CCC[C@@H](C)[C@H]1CC[C@H]2C3=CC=C4C[C@@H](O)CC[C@]4(C)[C@H]3CC[C@@]21C	C01164	C=C1CC[C@H](O)C/C1=C/C=C1\CCC[C@@]2(C)[C@H]1CC[C@@H]2[C@H](C)CCCC(C)C	C05443	R03311
M00103	1	2	C=C1CC[C@H](O)C/C1=C/C=C1\CCC[C@@]2(C)[C@H]1CC[C@@H]2[C@H](C)CCCC(C)C	C05443	C=C1CC[C@H](O)C/C1=C/C=C1\CCC[C@@]2(C)[C@H]1CC[C@@H]2[C@H](C)CCCC(C)(C)O	C01561	R03611
M00103	1	3	C=C1CC[C@H](O)C/C1=C/C=C1\CCC[C@@]2(C)[C@H]1CC[C@@H]2[C@H](C)CCCC(C)(C)O	C01561	C=C1/C(=C\C=C2/CCC[C@@]3(C)[C@H]2CC[C@@H]3[C@H](C)CCCC(C)(C)O)C[C@@H](O)C[C@@H]1O	C01673	R03610
M00104	1	1	CC(C)CCC[C@@H](C)[C@H]1CC[C@H]2[C@@H]3CC=C4C[C@@H](O)CC[C@]4(C)[C@H]3CC[C@@]21C	C00187	CC(C)CCC[C@@H](C)[C@H]1CC[C@H]2[C@@H]3[C@H](O)C=C4C[C@@H](O)CC[C@]4(C)[C@H]3CC[C@@]21C	C03594	R01463
M00104	1	2	CC(C)CCC[C@@H](C)[C@H]1CC[C@H]2[C@@H]3[C@H](O)C=C4C[C@@H](O)CC[C@]4(C)[C@H]3CC[C@@]21C	C03594	CC(C)CCC[C@@H](C)[C@H]1CC[C@H]2[C@H]3[C@H](CC[C@@]21C)[C@@]1(C)CCC(=O)C=C1C[C@H]3O	C05455	R04263
M00104	1	3	CC(C)CCC[C@@H](C)[C@H]1CC[C@H]2[C@H]3[C@H](CC[C@@]21C)[C@@]1(C)CCC(=O)C=C1C[C@H]3O	C05455	CC(C)CCC[C@@H](C)[C@H]1CC[C@H]2[C@H]3[C@H](CC[C@@]21C)[C@@]1(C)CCC(=O)C[C@H]1C[C@H]3O	C05451	R04817
M00104	1	4	CC(C)CCC[C@@H](C)[C@H]1CC[C@H]2[C@H]3[C@H](CC[C@@]21C)[C@@]1(C)CCC(=O)C[C@H]1C[C@H]3O	C05451	CC(C)CCC[C@@H](C)[C@H]1CC[C@H]2[C@H]3[C@H](CC[C@@]21C)[C@@]1(C)CC[C@@H](O)C[C@H]1C[C@H]3O	C05452	R04818;R04819
M00104	1	5	CC(C)CCC[C@@H](C)[C@H]1CC[C@H]2[C@H]3[C@H](CC[C@@]21C)[C@@]1(C)CC[C@@H](O)C[C@H]1C[C@H]3O	C05452	CC(CO)CCC[C@@H](C)[C@H]1CC[C@H]2[C@H]3[C@H](CC[C@@]21C)[C@@]1(C)CC[C@@H](O)C[C@H]1C[C@H]3O	C05444	R04806
M00104	2	1	CC(C=O)CCC[C@@H](C)[C@H]1CC[C@H]2[C@H]3[C@H](CC[C@@]21C)[C@@]1(C)CC[C@@H](O)C[C@H]1C[C@H]3O	C05445	C[C@H](CCC[C@@H](C)[C@H]1CC[C@H]2[C@H]3[C@H](CC[C@@]21C)[C@@]1(C)CC[C@@H](O)C[C@H]1C[C@H]3O)C(=O)O	C04554	R08760
M00104	2	2	C[C@H](CCC[C@@H](C)[C@H]1CC[C@H]2[C@H]3[C@H](CC[C@@]21C)[C@@]1(C)CC[C@@H](O)C[C@H]1C[C@H]3O)C(=O)O	C04554	C[C@H](CCC[C@@H](C)[C@H]1CC[C@H]2[C@H]3[C@H](CC[C@@]21C)[C@@]1(C)CC[C@@H](O)C[C@H]1C[C@H]3O)C(=O)SCCNC(=O)CCNC(=O)[C@H](O)C(C)(C)COP(=O)(O)OP(=O)(O)OC[C@H]1O[C@@H](n2cnc3c(N)ncnc32)[C@H](O)[C@@H]1OP(=O)(O)O	C17345	R08738
M00104	2	3	C[C@H](CCC[C@@H](C)[C@H]1CC[C@H]2[C@H]3[C@H](CC[C@@]21C)[C@@]1(C)CC[C@@H](O)C[C@H]1C[C@H]3O)C(=O)SCCNC(=O)CCNC(=O)[C@H](O)C(C)(C)COP(=O)(O)OP(=O)(O)OC[C@H]1O[C@@H](n2cnc3c(N)ncnc32)[C@H](O)[C@@H]1OP(=O)(O)O	C17345	C[C@@H](CCC[C@@H](C)[C@H]1CC[C@H]2[C@H]3[C@H](CC[C@@]21C)[C@@]1(C)CC[C@@H](O)C[C@H]1C[C@H]3O)C(=O)SCCNC(=O)CCNC(=O)[C@H](O)C(C)(C)COP(=O)(O)OP(=O)(O)OC[C@H]1O[C@@H](n2cnc3c(N)ncnc32)[C@H](O)[C@@H]1OP(=O)(O)O	C17346	R08739
M00104	2	4	C[C@@H](CCC[C@@H](C)[C@H]1CC[C@H]2[C@H]3[C@H](CC[C@@]21C)[C@@]1(C)CC[C@@H](O)C[C@H]1C[C@H]3O)C(=O)SCCNC(=O)CCNC(=O)[C@H](O)C(C)(C)COP(=O)(O)OP(=O)(O)OC[C@H]1O[C@@H](n2cnc3c(N)ncnc32)[C@H](O)[C@@H]1OP(=O)(O)O	C17346	C/C(=C\CC[C@@H](C)[C@H]1CC[C@H]2[C@H]3[C@H](CC[C@@]21C)[C@@]1(C)CC[C@@H](O)C[C@H]1C[C@H]3O)C(=O)SCCNC(=O)CCNC(=O)[C@H](O)C(C)(C)COP(=O)(O)OP(=O)(O)OC[C@H]1O[C@@H](n2cnc3c(N)ncnc32)[C@H](O)[C@@H]1OP(=O)(O)O	C05447	R08740
M00104	2	5	C/C(=C\CC[C@@H](C)[C@H]1CC[C@H]2[C@H]3[C@H](CC[C@@]21C)[C@@]1(C)CC[C@@H](O)C[C@H]1C[C@H]3O)C(=O)SCCNC(=O)CCNC(=O)[C@H](O)C(C)(C)COP(=O)(O)OP(=O)(O)OC[C@H]1O[C@@H](n2cnc3c(N)ncnc32)[C@H](O)[C@@H]1OP(=O)(O)O	C05447	CC(C(=O)SCCNC(=O)CCNC(=O)[C@H](O)C(C)(C)COP(=O)(O)OP(=O)(O)OC[C@H]1O[C@@H](n2cnc3c(N)ncnc32)[C@H](O)[C@@H]1OP(=O)(O)O)C(O)CC[C@@H](C)[C@H]1CC[C@H]2[C@H]3[C@H](CC[C@@]21C)[C@@]1(C)CC[C@@H](O)C[C@H]1C[C@H]3O	C05448	R04809
M00104	3	1	C[C@H](CCC[C@@H](C)[C@H]1CC[C@H]2[C@H]3[C@H](CC[C@@]21C)[C@@]1(C)CC[C@@H](O)C[C@H]1C[C@H]3O)C(=O)O	C04554	C[C@H](CCC[C@@H](C)[C@H]1CC[C@H]2[C@H]3[C@H](CC[C@@]21C)[C@@]1(C)CC[C@@H](O)C[C@H]1C[C@H]3O)C(=O)SCCNC(=O)CCNC(=O)[C@H](O)C(C)(C)COP(=O)(O)OP(=O)(O)OC[C@H]1O[C@@H](n2cnc3c(N)ncnc32)[C@H](O)[C@@H]1OP(=O)(O)O	C17345	R08738
M00104	3	2	C[C@H](CCC[C@@H](C)[C@H]1CC[C@H]2[C@H]3[C@H](CC[C@@]21C)[C@@]1(C)CC[C@@H](O)C[C@H]1C[C@H]3O)C(=O)SCCNC(=O)CCNC(=O)[C@H](O)C(C)(C)COP(=O)(O)OP(=O)(O)OC[C@H]1O[C@@H](n2cnc3c(N)ncnc32)[C@H](O)[C@@H]1OP(=O)(O)O	C17345	C[C@@H](CCC[C@@H](C)[C@H]1CC[C@H]2[C@H]3[C@H](CC[C@@]21C)[C@@]1(C)CC[C@@H](O)C[C@H]1C[C@H]3O)C(=O)SCCNC(=O)CCNC(=O)[C@H](O)C(C)(C)COP(=O)(O)OP(=O)(O)OC[C@H]1O[C@@H](n2cnc3c(N)ncnc32)[C@H](O)[C@@H]1OP(=O)(O)O	C17346	R08739
M00104	3	3	C[C@@H](CCC[C@@H](C)[C@H]1CC[C@H]2[C@H]3[C@H](CC[C@@]21C)[C@@]1(C)CC[C@@H](O)C[C@H]1C[C@H]3O)C(=O)SCCNC(=O)CCNC(=O)[C@H](O)C(C)(C)COP(=O)(O)OP(=O)(O)OC[C@H]1O[C@@H](n2cnc3c(N)ncnc32)[C@H](O)[C@@H]1OP(=O)(O)O	C17346	C/C(=C\CC[C@@H](C)[C@H]1CC[C@H]2[C@H]3[C@H](CC[C@@]21C)[C@@]1(C)CC[C@@H](O)C[C@H]1C[C@H]3O)C(=O)SCCNC(=O)CCNC(=O)[C@H](O)C(C)(C)COP(=O)(O)OP(=O)(O)OC[C@H]1O[C@@H](n2cnc3c(N)ncnc32)[C@H](O)[C@@H]1OP(=O)(O)O	C05447	R08740
M00104	3	4	C/C(=C\CC[C@@H](C)[C@H]1CC[C@H]2[C@H]3[C@H](CC[C@@]21C)[C@@]1(C)CC[C@@H](O)C[C@H]1C[C@H]3O)C(=O)SCCNC(=O)CCNC(=O)[C@H](O)C(C)(C)COP(=O)(O)OP(=O)(O)OC[C@H]1O[C@@H](n2cnc3c(N)ncnc32)[C@H](O)[C@@H]1OP(=O)(O)O	C05447	CC(C(=O)SCCNC(=O)CCNC(=O)[C@H](O)C(C)(C)COP(=O)(O)OP(=O)(O)OC[C@H]1O[C@@H](n2cnc3c(N)ncnc32)[C@H](O)[C@@H]1OP(=O)(O)O)C(O)CC[C@@H](C)[C@H]1CC[C@H]2[C@H]3[C@H](CC[C@@]21C)[C@@]1(C)CC[C@@H](O)C[C@H]1C[C@H]3O	C05448	R04809
M00104	3	5	CC(C(=O)SCCNC(=O)CCNC(=O)[C@H](O)C(C)(C)COP(=O)(O)OP(=O)(O)OC[C@H]1O[C@@H](n2cnc3c(N)ncnc32)[C@H](O)[C@@H]1OP(=O)(O)O)C(O)CC[C@@H](C)[C@H]1CC[C@H]2[C@H]3[C@H](CC[C@@]21C)[C@@]1(C)CC[C@@H](O)C[C@H]1C[C@H]3O	C05448	CC(C(=O)CC[C@@H](C)[C@H]1CC[C@H]2[C@H]3[C@H](CC[C@@]21C)[C@@]1(C)CC[C@@H](O)C[C@H]1C[C@H]3O)C(=O)SCCNC(=O)CCNC(=O)[C@H](O)C(C)(C)COP(=O)(O)OP(=O)(O)OC[C@H]1O[C@@H](n2cnc3c(N)ncnc32)[C@H](O)[C@@H]1OP(=O)(O)O	C05449	R04810
M00104	4	1	C[C@H](CCC(=O)SCCNC(=O)CCNC(=O)[C@H](O)C(C)(C)COP(=O)(O)OP(=O)(O)OC[C@H]1O[C@@H](n2cnc3c(N)ncnc32)[C@H](O)[C@@H]1OP(=O)(O)O)[C@H]1CC[C@H]2[C@H]3[C@H](CC[C@@]21C)[C@@]1(C)CC[C@@H](O)C[C@H]1C[C@H]3O	C05337	C[C@H](CCC(=O)O)[C@H]1CC[C@H]2[C@H]3[C@H](CC[C@@]21C)[C@@]1(C)CC[C@@H](O)C[C@H]1C[C@H]3O	C02528	R03974
M00106	1	1	C[C@H](CCC(=O)O)[C@H]1CC[C@H]2[C@H]3[C@H](C[C@H](O)[C@@]21C)[C@@]1(C)CC[C@@H](O)C[C@H]1C[C@H]3O	C00695	C[C@H](CCC(=O)SCCNC(=O)CCNC(=O)[C@H](O)C(C)(C)COP(=O)(O)OP(=O)(O)OC[C@H]1O[C@@H](n2cnc3c(N)ncnc32)[C@H](O)[C@@H]1OP(=O)(O)O)[C@H]1CC[C@H]2[C@H]3[C@H](C[C@H](O)[C@@]21C)[C@@]1(C)CC[C@@H](O)C[C@H]1C[C@H]3O	C01794	R02794
M00106	1	2	C[C@H](CCC(=O)SCCNC(=O)CCNC(=O)[C@H](O)C(C)(C)COP(=O)(O)OP(=O)(O)OC[C@H]1O[C@@H](n2cnc3c(N)ncnc32)[C@H](O)[C@@H]1OP(=O)(O)O)[C@H]1CC[C@H]2[C@H]3[C@H](C[C@H](O)[C@@]21C)[C@@]1(C)CC[C@@H](O)C[C@H]1C[C@H]3O	C01794	C[C@H](CCC(=O)NCC(=O)O)[C@H]1CC[C@H]2[C@H]3[C@H](C[C@H](O)[C@@]21C)[C@@]1(C)CC[C@@H](O)C[C@H]1C[C@H]3O	C01921	R03718
M00107	1	1	CC(C)CCC[C@@H](C)[C@H]1CC[C@H]2[C@@H]3CC=C4C[C@@H](O)CC[C@]4(C)[C@H]3CC[C@@]21C	C00187	CC(C)CC[C@@H](O)[C@@H](C)[C@H]1CC[C@H]2[C@@H]3CC=C4C[C@@H](O)CC[C@]4(C)[C@H]3CC[C@@]21C	C05502	R02723
M00107	1	2	CC(C)CC[C@@H](O)[C@@H](C)[C@H]1CC[C@H]2[C@@H]3CC=C4C[C@@H](O)CC[C@]4(C)[C@H]3CC[C@@]21C	C05502	CC(C)CC[C@@H](O)[C@](C)(O)[C@H]1CC[C@H]2[C@@H]3CC=C4C[C@@H](O)CC[C@]4(C)[C@H]3CC[C@@]21C	C05501	R04855
M00107	1	3	CC(C)CC[C@@H](O)[C@](C)(O)[C@H]1CC[C@H]2[C@@H]3CC=C4C[C@@H](O)CC[C@]4(C)[C@H]3CC[C@@]21C	C05501	CC(=O)[C@H]1CC[C@H]2[C@@H]3CC=C4C[C@@H](O)CC[C@]4(C)[C@H]3CC[C@]12C	C01953	R03933
M00107	1	4	CC(=O)[C@H]1CC[C@H]2[C@@H]3CC=C4C[C@@H](O)CC[C@]4(C)[C@H]3CC[C@]12C	C01953	CC(=O)[C@H]1CC[C@H]2[C@@H]3CCC4=CC(=O)CC[C@]4(C)[C@H]3CC[C@]12C	C00410	R02216
M00108	1	1	CC(=O)[C@H]1CC[C@H]2[C@@H]3CCC4=CC(=O)CC[C@]4(C)[C@H]3CC[C@]12C	C00410	C[C@]12CC[C@H]3[C@@H](CCC4=CC(=O)CC[C@@]43C)[C@@H]1CC[C@@H]2C(=O)CO	C03205	R02213
M00108	1	2	C[C@]12CC[C@H]3[C@@H](CCC4=CC(=O)CC[C@@]43C)[C@@H]1CC[C@@H]2C(=O)CO	C03205	C[C@]12C[C@H](O)[C@H]3[C@@H](CCC4=CC(=O)CC[C@@]43C)[C@@H]1CC[C@@H]2C(=O)CO	C02140	R03851
M00108	1	3	C[C@]12C[C@H](O)[C@H]3[C@@H](CCC4=CC(=O)CC[C@@]43C)[C@@H]1CC[C@@H]2C(=O)CO	C02140	C[C@]12CCC(=O)C=C1CC[C@@H]1[C@@H]2[C@@H](O)C[C@]2(CO)[C@@H](C(=O)CO)CC[C@@H]12	C01124	R03262
M00108	1	4	C[C@]12CCC(=O)C=C1CC[C@@H]1[C@@H]2[C@@H](O)C[C@]2(CO)[C@@H](C(=O)CO)CC[C@@H]12	C01124	C[C@]12CCC(=O)C=C1CC[C@@H]1[C@@H]2[C@@H](O)C[C@]2(C=O)[C@@H](C(=O)CO)CC[C@@H]12	C01780	R03263
M00109	1	1	CC(=O)[C@H]1CC[C@H]2[C@@H]3CCC4=CC(=O)CC[C@]4(C)[C@H]3CC[C@]12C	C00410	CC(=O)[C@@]1(O)CC[C@H]2[C@@H]3CCC4=CC(=O)CC[C@]4(C)[C@H]3CC[C@@]21C	C01176	R02211
M00109	1	2	CC(=O)[C@@]1(O)CC[C@H]2[C@@H]3CCC4=CC(=O)CC[C@]4(C)[C@H]3CC[C@@]21C	C01176	C[C@]12CC[C@H]3[C@@H](CCC4=CC(=O)CC[C@@]43C)[C@@H]1CC[C@]2(O)C(=O)CO	C05488	R03326
M00109	1	3	C[C@]12CC[C@H]3[C@@H](CCC4=CC(=O)CC[C@@]43C)[C@@H]1CC[C@]2(O)C(=O)CO	C05488	C[C@]12C[C@H](O)[C@H]3[C@@H](CCC4=CC(=O)CC[C@@]43C)[C@@H]1CC[C@]2(O)C(=O)CO	C00735	R02843
M00109	1	4	C[C@]12C[C@H](O)[C@H]3[C@@H](CCC4=CC(=O)CC[C@@]43C)[C@@H]1CC[C@]2(O)C(=O)CO	C00735	C[C@]12CC(=O)[C@H]3[C@@H](CCC4=CC(=O)CC[C@@]43C)[C@@H]1CC[C@]2(O)C(=O)CO	C00762	R02834;R02836
M00110	1	1	CC(=O)[C@H]1CC[C@H]2[C@@H]3CC=C4C[C@@H](O)CC[C@]4(C)[C@H]3CC[C@]12C	C01953	CC(=O)[C@@]1(O)CC[C@H]2[C@@H]3CC=C4C[C@@H](O)CC[C@]4(C)[C@H]3CC[C@@]21C	C05138	R03783
M00110	1	2	CC(=O)[C@@]1(O)CC[C@H]2[C@@H]3CC=C4C[C@@H](O)CC[C@]4(C)[C@H]3CC[C@@]21C	C05138	C[C@]12CC[C@H]3[C@@H](CC=C4C[C@@H](O)CC[C@@]43C)[C@@H]1CCC2=O	C01227	R08517
M00110	1	3	C[C@]12CC[C@H]3[C@@H](CC=C4C[C@@H](O)CC[C@@]43C)[C@@H]1CCC2=O	C01227	C[C@]12CC[C@H]3[C@@H](CCC4=CC(=O)CC[C@@]43C)[C@@H]1CCC2=O	C00280	R01837
M00110	1	4	C[C@]12CC[C@H]3[C@@H](CCC4=CC(=O)CC[C@@]43C)[C@@H]1CCC2=O	C00280	C[C@]12CC[C@H]3[C@@H](CCC4=CC(=O)CC[C@@]43CO)[C@@H]1CCC2=O	C05290	R01840
M00110	1	5	C[C@]12CC[C@H]3[C@@H](CCC4=CC(=O)CC[C@@]43CO)[C@@H]1CCC2=O	C05290	C[C@]12CC[C@H]3[C@@H](CCC4=CC(=O)CC[C@@]43C=O)[C@@H]1CCC2=O	C05297	R04759
M00110	2	1	CC(=O)[C@@]1(O)CC[C@H]2[C@@H]3CC=C4C[C@@H](O)CC[C@]4(C)[C@H]3CC[C@@]21C	C05138	C[C@]12CC[C@H]3[C@@H](CC=C4C[C@@H](O)CC[C@@]43C)[C@@H]1CCC2=O	C01227	R08517
M00110	2	2	C[C@]12CC[C@H]3[C@@H](CC=C4C[C@@H](O)CC[C@@]43C)[C@@H]1CCC2=O	C01227	C[C@]12CC[C@H]3[C@@H](CCC4=CC(=O)CC[C@@]43C)[C@@H]1CCC2=O	C00280	R01837
M00110	2	3	C[C@]12CC[C@H]3[C@@H](CCC4=CC(=O)CC[C@@]43C)[C@@H]1CCC2=O	C00280	C[C@]12CC[C@H]3[C@@H](CCC4=CC(=O)CC[C@@]43CO)[C@@H]1CCC2=O	C05290	R01840
M00110	2	4	C[C@]12CC[C@H]3[C@@H](CCC4=CC(=O)CC[C@@]43CO)[C@@H]1CCC2=O	C05290	C[C@]12CC[C@H]3[C@@H](CCC4=CC(=O)CC[C@@]43C=O)[C@@H]1CCC2=O	C05297	R04759
M00110	2	5	C[C@]12CC[C@H]3[C@@H](CCC4=CC(=O)CC[C@@]43C=O)[C@@H]1CCC2=O	C05297	C[C@]12CC[C@@H]3c4ccc(O)cc4CC[C@H]3[C@@H]1CCC2=O	C00468	R02351
M00113	1	1	CC/C=C\C/C=C\C/C=C\CCCCCCCC(=O)O	C06427	CC/C=C\C[C@@H](/C=C/C=C\CCCCCCCC(=O)O)OO	C04785	R07869
M00113	1	2	CC/C=C\C[C@@H](/C=C/C=C\CCCCCCCC(=O)O)OO	C04785	CC/C=C\C[C@@H]1O/C1=C\C=C/CCCCCCCC(=O)O	C04672	R07863
M00113	1	3	CC/C=C\C[C@@H]1O/C1=C\C=C/CCCCCCCC(=O)O	C04672	CC/C=C\C[C@@H]1C(=O)C=C[C@@H]1CCCCCCCC(=O)O	C01226	R03402
M00113	1	4	CC/C=C\C[C@@H]1C(=O)C=C[C@@H]1CCCCCCCC(=O)O	C01226	CC/C=C\C[C@@H]1C(=O)CC[C@@H]1CCCCCCCC(=O)O	C04780	R03401
M00113	1	5	CC/C=C\C[C@@H]1C(=O)CC[C@@H]1CCCCCCCC(=O)O	C04780	CC/C=C\C[C@@H]1C(=O)CC[C@@H]1CCCCCCCC(=O)SCCNC(=O)CCNC(=O)[C@H](O)C(C)(C)COP(=O)(O)OP(=O)(O)OC[C@H]1O[C@@H](n2cnc3c(N)ncnc32)[C@H](O)[C@@H]1OP(=O)(O)O	C16327	R07887
M00113	2	1	CC/C=C\C[C@@H]1C(=O)CC[C@@H]1CCCCC/C=C/C(=O)SCCNC(=O)CCNC(=O)[C@H](O)C(C)(C)COP(=O)(O)OP(=O)(O)OC[C@H]1O[C@@H](n2cnc3c(N)ncnc32)[C@H](O)[C@@H]1OP(=O)(O)O	C16328	CC/C=C\C[C@@H]1C(=O)CC[C@@H]1CCCCCC(=O)CC(=O)SCCNC(=O)CCNC(=O)[C@H](O)C(C)(C)COP(=O)(O)OP(=O)(O)OC[C@H]1O[C@@H](n2cnc3c(N)ncnc32)[C@H](O)[C@@H]1OP(=O)(O)O	C16330	R07889;R07890
M00113	2	2	CC/C=C\C[C@@H]1C(=O)CC[C@@H]1CCCCCC(=O)CC(=O)SCCNC(=O)CCNC(=O)[C@H](O)C(C)(C)COP(=O)(O)OP(=O)(O)OC[C@H]1O[C@@H](n2cnc3c(N)ncnc32)[C@H](O)[C@@H]1OP(=O)(O)O	C16330	CC/C=C\C[C@@H]1C(=O)CC[C@@H]1CCCCCC(=O)SCCNC(=O)CCNC(=O)[C@H](O)C(C)(C)COP(=O)(O)OP(=O)(O)OC[C@H]1O[C@@H](n2cnc3c(N)ncnc32)[C@H](O)[C@@H]1OP(=O)(O)O	C16331	R07891
M00113	2	3	CC/C=C\C[C@@H]1C(=O)CC[C@@H]1CCCCCC(=O)SCCNC(=O)CCNC(=O)[C@H](O)C(C)(C)COP(=O)(O)OP(=O)(O)OC[C@H]1O[C@@H](n2cnc3c(N)ncnc32)[C@H](O)[C@@H]1OP(=O)(O)O	C16331	CC/C=C\C[C@@H]1C(=O)CC[C@@H]1CCC/C=C/C(=O)SCCNC(=O)CCNC(=O)[C@H](O)C(C)(C)COP(=O)(O)OP(=O)(O)OC[C@H]1O[C@@H](n2cnc3c(N)ncnc32)[C@H](O)[C@@H]1OP(=O)(O)O	C16332	R07892
M00113	2	4	CC/C=C\C[C@@H]1C(=O)CC[C@@H]1CCC/C=C/C(=O)SCCNC(=O)CCNC(=O)[C@H](O)C(C)(C)COP(=O)(O)OP(=O)(O)OC[C@H]1O[C@@H](n2cnc3c(N)ncnc32)[C@H](O)[C@@H]1OP(=O)(O)O	C16332	CC/C=C\C[C@@H]1C(=O)CC[C@@H]1CCCC(=O)CC(=O)SCCNC(=O)CCNC(=O)[C@H](O)C(C)(C)COP(=O)(O)OP(=O)(O)OC[C@H]1O[C@@H](n2cnc3c(N)ncnc32)[C@H](O)[C@@H]1OP(=O)(O)O	C16334	R07893;R07894
M00113	2	5	CC/C=C\C[C@@H]1C(=O)CC[C@@H]1CCCC(=O)CC(=O)SCCNC(=O)CCNC(=O)[C@H](O)C(C)(C)COP(=O)(O)OP(=O)(O)OC[C@H]1O[C@@H](n2cnc3c(N)ncnc32)[C@H](O)[C@@H]1OP(=O)(O)O	C16334	CC/C=C\C[C@@H]1C(=O)CC[C@@H]1CCCC(=O)SCCNC(=O)CCNC(=O)[C@H](O)C(C)(C)COP(=O)(O)OP(=O)(O)OC[C@H]1O[C@@H](n2cnc3c(N)ncnc32)[C@H](O)[C@@H]1OP(=O)(O)O	C16335	R07895
M00113	3	1	CC/C=C\C[C@@H]1C(=O)CC[C@@H]1CCCC(=O)CC(=O)SCCNC(=O)CCNC(=O)[C@H](O)C(C)(C)COP(=O)(O)OP(=O)(O)OC[C@H]1O[C@@H](n2cnc3c(N)ncnc32)[C@H](O)[C@@H]1OP(=O)(O)O	C16334	CC/C=C\C[C@@H]1C(=O)CC[C@@H]1CCCC(=O)SCCNC(=O)CCNC(=O)[C@H](O)C(C)(C)COP(=O)(O)OP(=O)(O)OC[C@H]1O[C@@H](n2cnc3c(N)ncnc32)[C@H](O)[C@@H]1OP(=O)(O)O	C16335	R07895
M00113	3	2	CC/C=C\C[C@@H]1C(=O)CC[C@@H]1CCCC(=O)SCCNC(=O)CCNC(=O)[C@H](O)C(C)(C)COP(=O)(O)OP(=O)(O)OC[C@H]1O[C@@H](n2cnc3c(N)ncnc32)[C@H](O)[C@@H]1OP(=O)(O)O	C16335	CC/C=C\C[C@@H]1C(=O)CC[C@@H]1C/C=C/C(=O)SCCNC(=O)CCNC(=O)[C@H](O)C(C)(C)COP(=O)(O)OP(=O)(O)OC[C@H]1O[C@@H](n2cnc3c(N)ncnc32)[C@H](O)[C@@H]1OP(=O)(O)O	C16336	R07896
M00113	3	3	CC/C=C\C[C@@H]1C(=O)CC[C@@H]1C/C=C/C(=O)SCCNC(=O)CCNC(=O)[C@H](O)C(C)(C)COP(=O)(O)OP(=O)(O)OC[C@H]1O[C@@H](n2cnc3c(N)ncnc32)[C@H](O)[C@@H]1OP(=O)(O)O	C16336	CC/C=C\C[C@@H]1C(=O)CC[C@@H]1CC(=O)CC(=O)SCCNC(=O)CCNC(=O)[C@H](O)C(C)(C)COP(=O)(O)OP(=O)(O)OC[C@H]1O[C@@H](n2cnc3c(N)ncnc32)[C@H](O)[C@@H]1OP(=O)(O)O	C16338	R07897;R07898
M00113	3	4	CC/C=C\C[C@@H]1C(=O)CC[C@@H]1CC(=O)CC(=O)SCCNC(=O)CCNC(=O)[C@H](O)C(C)(C)COP(=O)(O)OP(=O)(O)OC[C@H]1O[C@@H](n2cnc3c(N)ncnc32)[C@H](O)[C@@H]1OP(=O)(O)O	C16338	CC/C=C\C[C@@H]1C(=O)CC[C@@H]1CC(=O)SCCNC(=O)CCNC(=O)[C@H](O)C(C)(C)COP(=O)(O)OP(=O)(O)OC[C@H]1O[C@@H](n2cnc3c(N)ncnc32)[C@H](O)[C@@H]1OP(=O)(O)O	C16339	R07899
M00113	3	5	CC/C=C\C[C@@H]1C(=O)CC[C@@H]1CC(=O)SCCNC(=O)CCNC(=O)[C@H](O)C(C)(C)COP(=O)(O)OP(=O)(O)OC[C@H]1O[C@@H](n2cnc3c(N)ncnc32)[C@H](O)[C@@H]1OP(=O)(O)O	C16339	CC/C=C\C[C@@H]1C(=O)CC[C@@H]1CC(=O)O	C16317	R07902
M00114	1	1	O=P(O)(O)OC[C@H]1O[C@H](O)[C@H](O)[C@@H](O)[C@@H]1O	C00668	O=P(O)(O)OC[C@H]1O[C@](O)(CO)[C@@H](O)[C@@H]1O	C05345	R02740
M00114	1	2	O=P(O)(O)OC[C@H]1O[C@](O)(CO)[C@@H](O)[C@@H]1O	C05345	O=P(O)(O)OC[C@H]1OC(O)[C@@H](O)[C@@H](O)[C@@H]1O	C00275	R01819
M00114	1	3	O=P(O)(O)OC[C@H]1OC(O)[C@@H](O)[C@@H](O)[C@@H]1O	C00275	O=P(O)(O)O[C@H]1O[C@H](CO)[C@@H](O)[C@H](O)[C@@H]1O	C00636	R01818
M00114	1	4	O=P(O)(O)O[C@H]1O[C@H](CO)[C@@H](O)[C@H](O)[C@@H]1O	C00636	Nc1nc2c(ncn2[C@@H]2O[C@H](COP(=O)(O)OP(=O)(O)O[C@H]3O[C@H](CO)[C@@H](O)[C@H](O)[C@@H]3O)[C@@H](O)[C@H]2O)c(=O)[nH]1	C00096	R00885
M00114	1	5	Nc1nc2c(ncn2[C@@H]2O[C@H](COP(=O)(O)OP(=O)(O)O[C@H]3O[C@H](CO)[C@@H](O)[C@H](O)[C@@H]3O)[C@@H](O)[C@H]2O)c(=O)[nH]1	C00096	Nc1nc2c(ncn2[C@@H]2O[C@H](COP(=O)(O)OP(=O)(O)O[C@H]3O[C@@H](CO)[C@@H](O)[C@@H](O)[C@@H]3O)[C@@H](O)[C@H]2O)c(=O)[nH]1	C02280	R00889
M00114	2	1	O=P(O)(O)O[C@H]1O[C@H](CO)[C@@H](O)[C@H](O)[C@@H]1O	C00636	Nc1nc2c(ncn2[C@@H]2O[C@H](COP(=O)(O)OP(=O)(O)O[C@H]3O[C@H](CO)[C@@H](O)[C@H](O)[C@@H]3O)[C@@H](O)[C@H]2O)c(=O)[nH]1	C00096	R00885
M00114	2	2	Nc1nc2c(ncn2[C@@H]2O[C@H](COP(=O)(O)OP(=O)(O)O[C@H]3O[C@H](CO)[C@@H](O)[C@H](O)[C@@H]3O)[C@@H](O)[C@H]2O)c(=O)[nH]1	C00096	Nc1nc2c(ncn2[C@@H]2O[C@H](COP(=O)(O)OP(=O)(O)O[C@H]3O[C@@H](CO)[C@@H](O)[C@@H](O)[C@@H]3O)[C@@H](O)[C@H]2O)c(=O)[nH]1	C02280	R00889
M00114	2	3	Nc1nc2c(ncn2[C@@H]2O[C@H](COP(=O)(O)OP(=O)(O)O[C@H]3O[C@@H](CO)[C@@H](O)[C@@H](O)[C@@H]3O)[C@@H](O)[C@H]2O)c(=O)[nH]1	C02280	O=P(O)(O)O[C@H]1O[C@@H](CO)[C@@H](O)[C@@H](O)[C@@H]1O	C15926	R07678
M00114	2	4	O=P(O)(O)O[C@H]1O[C@@H](CO)[C@@H](O)[C@@H](O)[C@@H]1O	C15926	OC[C@@H]1OC(O)[C@@H](O)[C@H](O)[C@@H]1O	C01825	R07674
M00114	2	5	OC[C@@H]1OC(O)[C@@H](O)[C@H](O)[C@@H]1O	C01825	O=C1O[C@H]([C@@H](O)CO)[C@@H](O)[C@@H]1O	C01115	R07675
M00115	1	1	N[C@@H](CC(=O)O)C(=O)O	C00049	N=C(CC(=O)O)C(=O)O	C05840	R00481
M00115	1	2	N=C(CC(=O)O)C(=O)O	C05840	O=C(O)c1cccnc1C(=O)O	C03722	R04292
M00115	1	3	O=C(O)c1cccnc1C(=O)O	C03722	O=C(O)c1ccc[n+]([C@@H]2O[C@H](COP(=O)(O)O)[C@@H](O)[C@H]2O)c1	C01185	R03348
M00115	1	4	O=C(O)c1ccc[n+]([C@@H]2O[C@H](COP(=O)(O)O)[C@@H](O)[C@H]2O)c1	C01185	Nc1ncnc2c1ncn2[C@@H]1O[C@H](COP(=O)(O)OP(=O)(O)OC[C@H]2O[C@@H]([n+]3cccc(C(=O)O)c3)[C@H](O)[C@@H]2O)[C@@H](O)[C@H]1O	C00857	R03005
M00115	1	5	Nc1ncnc2c1ncn2[C@@H]1O[C@H](COP(=O)(O)OP(=O)(O)OC[C@H]2O[C@@H]([n+]3cccc(C(=O)O)c3)[C@H](O)[C@@H]2O)[C@@H](O)[C@H]1O	C00857	NC(=O)c1ccc[n+]([C@@H]2O[C@H](COP(=O)(O)OP(=O)(O)OC[C@H]3O[C@@H](n4cnc5c(N)ncnc54)[C@H](O)[C@@H]3O)[C@@H](O)[C@H]2O)c1	C00003	R00189;R00257
M00116	1	1	C=C(O[C@@H]1C=C(C(=O)O)C=C[C@H]1O)C(=O)O	C00251	C=C(O[C@H]1C=CC=C(C(=O)O)[C@@H]1O)C(=O)O	C00885	R01717
M00116	1	2	C=C(O[C@H]1C=CC=C(C(=O)O)[C@@H]1O)C(=O)O	C00885	C=C(O[C@H]1C=C[C@H](C(=O)CCC(=O)O)[C@@H](C(=O)O)[C@@H]1O)C(=O)O	C16519	R08165
M00116	1	3	C=C(O[C@H]1C=C[C@H](C(=O)CCC(=O)O)[C@@H](C(=O)O)[C@@H]1O)C(=O)O	C16519	O=C(O)CCC(=O)C1=CC=C[C@@H](O)[C@@H]1C(=O)O	C05817	R08166
M00116	1	4	O=C(O)CCC(=O)C1=CC=C[C@@H](O)[C@@H]1C(=O)O	C05817	O=C(O)CCC(=O)c1ccccc1C(=O)O	C02730	R04031
M00116	1	5	O=C(O)CCC(=O)c1ccccc1C(=O)O	C02730	CC(C)(COP(=O)(O)OP(=O)(O)OC[C@H]1O[C@@H](n2cnc3c(N)ncnc32)[C@H](O)[C@@H]1OP(=O)(O)O)[C@@H](O)C(=O)NCCC(=O)NCCSC(=O)CCC(=O)c1ccccc1C(=O)O	C03160	R04030
M00116	2	1	C=C(O[C@H]1C=C[C@H](C(=O)CCC(=O)O)[C@@H](C(=O)O)[C@@H]1O)C(=O)O	C16519	O=C(O)CCC(=O)C1=CC=C[C@@H](O)[C@@H]1C(=O)O	C05817	R08166
M00116	2	2	O=C(O)CCC(=O)C1=CC=C[C@@H](O)[C@@H]1C(=O)O	C05817	O=C(O)CCC(=O)c1ccccc1C(=O)O	C02730	R04031
M00116	2	3	O=C(O)CCC(=O)c1ccccc1C(=O)O	C02730	CC(C)(COP(=O)(O)OP(=O)(O)OC[C@H]1O[C@@H](n2cnc3c(N)ncnc32)[C@H](O)[C@@H]1OP(=O)(O)O)[C@@H](O)C(=O)NCCC(=O)NCCSC(=O)CCC(=O)c1ccccc1C(=O)O	C03160	R04030
M00116	2	4	CC(C)(COP(=O)(O)OP(=O)(O)OC[C@H]1O[C@@H](n2cnc3c(N)ncnc32)[C@H](O)[C@@H]1OP(=O)(O)O)[C@@H](O)C(=O)NCCC(=O)NCCSC(=O)CCC(=O)c1ccccc1C(=O)O	C03160	CC(C)(COP(=O)(O)OP(=O)(O)OC[C@H]1O[C@@H](n2cnc3c(N)ncnc32)[C@H](O)[C@@H]1OP(=O)(O)O)[C@@H](O)C(=O)NCCC(=O)NCCSC(=O)c1cc(O)c2ccccc2c1O	C15547	R07263
M00116	2	5	CC(C)(COP(=O)(O)OP(=O)(O)OC[C@H]1O[C@@H](n2cnc3c(N)ncnc32)[C@H](O)[C@@H]1OP(=O)(O)O)[C@@H](O)C(=O)NCCC(=O)NCCSC(=O)c1cc(O)c2ccccc2c1O	C15547	O=C(O)c1cc(O)c2ccccc2c1O	C03657	R07262
M00117	1	1	C=C(O[C@@H]1C=C(C(=O)O)C=C[C@H]1O)C(=O)O	C00251	O=C(O)c1ccc(O)cc1	C00156	R01302
M00118	1	1	N[C@@H](CCC(=O)O)C(=O)O	C00025	N[C@@H](CCC(=O)N[C@@H](CS)C(=O)O)C(=O)O	C00669	R00894
M00118	1	2	N[C@@H](CCC(=O)N[C@@H](CS)C(=O)O)C(=O)O	C00669	N[C@@H](CCC(=O)N[C@@H](CS)C(=O)NCC(=O)O)C(=O)O	C00051	R00497
M00119	1	1	CC(C)[C@H](N)C(=O)O	C00183	CC(C)C(=O)C(=O)O	C00141	R01214
M00119	1	2	CC(C)C(=O)C(=O)O	C00141	CC(C)(CO)C(=O)C(=O)O	C00966	R01226
M00119	1	3	CC(C)(CO)C(=O)C(=O)O	C00966	CC(C)(CO)[C@@H](O)C(=O)O	C00522	R02472
M00119	1	4	CC(C)(CO)[C@@H](O)C(=O)O	C00522	CC(C)(CO)[C@@H](O)C(=O)NCCC(=O)O	C00864	R02473
M00120	1	1	CC(C)(CO)[C@@H](O)C(=O)NCCC(=O)O	C00864	CC(C)(COP(=O)(O)O)[C@@H](O)C(=O)NCCC(=O)O	C03492	R03018
M00120	1	2	CC(C)(COP(=O)(O)O)[C@@H](O)C(=O)NCCC(=O)O	C03492	CC(C)(COP(=O)(O)O)[C@@H](O)C(=O)NCCC(=O)N[C@@H](CS)C(=O)O	C04352	R04230;R04231
M00120	1	3	CC(C)(COP(=O)(O)O)[C@@H](O)C(=O)NCCC(=O)N[C@@H](CS)C(=O)O	C04352	CC(C)(COP(=O)(O)O)[C@@H](O)C(=O)NCCC(=O)NCCS	C01134	R03269
M00120	1	4	CC(C)(COP(=O)(O)O)[C@@H](O)C(=O)NCCC(=O)NCCS	C01134	CC(C)(COP(=O)(O)OP(=O)(O)OC[C@H]1O[C@@H](n2cnc3c(N)ncnc32)[C@H](O)[C@@H]1O)[C@@H](O)C(=O)NCCC(=O)NCCS	C00882	R03035
M00120	1	5	CC(C)(COP(=O)(O)OP(=O)(O)OC[C@H]1O[C@@H](n2cnc3c(N)ncnc32)[C@H](O)[C@@H]1O)[C@@H](O)C(=O)NCCC(=O)NCCS	C00882	CC(C)(COP(=O)(O)OP(=O)(O)OC[C@H]1O[C@@H](n2cnc3c(N)ncnc32)[C@H](O)[C@@H]1OP(=O)(O)O)[C@@H](O)C(=O)NCCC(=O)NCCS	C00010	R00130
M00121	1	1	N[C@H](C=O)CCC(=O)O	C03741	NCC(=O)CCC(=O)O	C00430	R02272
M00121	1	2	NCC(=O)CCC(=O)O	C00430	NCc1[nH]cc(CCC(=O)O)c1CC(=O)O	C00931	R00036
M00121	1	3	NCc1[nH]cc(CCC(=O)O)c1CC(=O)O	C00931	O=C(O)CCc1c[nH]c(Cc2[nH]c(Cc3[nH]c(Cc4[nH]c(CO)c(CC(=O)O)c4CCC(=O)O)c(CC(=O)O)c3CCC(=O)O)c(CC(=O)O)c2CCC(=O)O)c1CC(=O)O	C01024	R00084
M00121	1	4	O=C(O)CCc1c[nH]c(Cc2[nH]c(Cc3[nH]c(Cc4[nH]c(CO)c(CC(=O)O)c4CCC(=O)O)c(CC(=O)O)c3CCC(=O)O)c(CC(=O)O)c2CCC(=O)O)c1CC(=O)O	C01024	O=C(O)CCc1c2[nH]c(c1CC(=O)O)Cc1[nH]c(c(CC(=O)O)c1CCC(=O)O)Cc1[nH]c(c(CC(=O)O)c1CCC(=O)O)Cc1[nH]c(c(CCC(=O)O)c1CC(=O)O)C2	C01051	R03165
M00121	1	5	O=C(O)CCc1c2[nH]c(c1CC(=O)O)Cc1[nH]c(c(CC(=O)O)c1CCC(=O)O)Cc1[nH]c(c(CC(=O)O)c1CCC(=O)O)Cc1[nH]c(c(CCC(=O)O)c1CC(=O)O)C2	C01051	Cc1c2[nH]c(c1CCC(=O)O)Cc1[nH]c(c(CCC(=O)O)c1C)Cc1[nH]c(c(CCC(=O)O)c1C)Cc1[nH]c(c(C)c1CCC(=O)O)C2	C03263	R03197
M00121	2	1	NCc1[nH]cc(CCC(=O)O)c1CC(=O)O	C00931	O=C(O)CCc1c[nH]c(Cc2[nH]c(Cc3[nH]c(Cc4[nH]c(CO)c(CC(=O)O)c4CCC(=O)O)c(CC(=O)O)c3CCC(=O)O)c(CC(=O)O)c2CCC(=O)O)c1CC(=O)O	C01024	R00084
M00121	2	2	O=C(O)CCc1c[nH]c(Cc2[nH]c(Cc3[nH]c(Cc4[nH]c(CO)c(CC(=O)O)c4CCC(=O)O)c(CC(=O)O)c3CCC(=O)O)c(CC(=O)O)c2CCC(=O)O)c1CC(=O)O	C01024	O=C(O)CCc1c2[nH]c(c1CC(=O)O)Cc1[nH]c(c(CC(=O)O)c1CCC(=O)O)Cc1[nH]c(c(CC(=O)O)c1CCC(=O)O)Cc1[nH]c(c(CCC(=O)O)c1CC(=O)O)C2	C01051	R03165
M00121	2	3	O=C(O)CCc1c2[nH]c(c1CC(=O)O)Cc1[nH]c(c(CC(=O)O)c1CCC(=O)O)Cc1[nH]c(c(CC(=O)O)c1CCC(=O)O)Cc1[nH]c(c(CCC(=O)O)c1CC(=O)O)C2	C01051	Cc1c2[nH]c(c1CCC(=O)O)Cc1[nH]c(c(CCC(=O)O)c1C)Cc1[nH]c(c(CCC(=O)O)c1C)Cc1[nH]c(c(C)c1CCC(=O)O)C2	C03263	R03197
M00121	2	4	Cc1c2[nH]c(c1CCC(=O)O)Cc1[nH]c(c(CCC(=O)O)c1C)Cc1[nH]c(c(CCC(=O)O)c1C)Cc1[nH]c(c(C)c1CCC(=O)O)C2	C03263	C=Cc1c2[nH]c(c1C)Cc1[nH]c(c(CCC(=O)O)c1C)Cc1[nH]c(c(C)c1CCC(=O)O)Cc1[nH]c(c(C)c1C=C)C2	C01079	R03220;R06895
M00121	2	5	C=Cc1c2[nH]c(c1C)Cc1[nH]c(c(CCC(=O)O)c1C)Cc1[nH]c(c(C)c1CCC(=O)O)Cc1[nH]c(c(C)c1C=C)C2	C01079	C=CC1=C(C)c2cc3[nH]c(cc4nc(cc5[nH]c(cc1n2)c(C)c5CCC(=O)O)C(CCC(=O)O)=C4C)c(C)c3C=C	C02191	R03222;R09489
M00122	1	1	C/C1=C2/N=C(/C=C3\N=C(/C(C)=C4/[C@@H](CCC(=O)O)[C@](C)(CC(N)=O)[C@](C)(C5N=C1[C@](C)(CCC(=O)O)[C@H]5CC(=O)O)N4[Co])[C@@](C)(CC(N)=O)[C@@H]3CCC(=O)O)C(C)(C)[C@@H]2CCC(=O)O	C06505	C/C1=C2/N=C(/C=C3\N=C(/C(C)=C4/[C@@H](CCC(=O)O)[C@](C)(CC(N)=O)[C@](C)(C5N=C1[C@](C)(CCC(=O)O)[C@H]5CC(=O)O)N4[Co+]C[C@H]1O[C@@H](n4cnc5c(N)ncnc54)[C@H](O)[C@@H]1O)[C@@](C)(CC(N)=O)[C@@H]3CCC(=O)O)C(C)(C)[C@@H]2CCC(=O)O	C06506	R05220
M00122	2	1	C/C1=C2/N=C(/C=C3\N=C(/C(C)=C4/[C@@H](CCC(N)=O)[C@](C)(CC(N)=O)[C@](C)(C5N=C1[C@](C)(CCC(=O)O)[C@H]5CC(N)=O)N4[Co+]C[C@H]1O[C@@H](n4cnc5c(N)ncnc54)[C@H](O)[C@@H]1O)[C@@](C)(CC(N)=O)[C@@H]3CCC(N)=O)C(C)(C)[C@@H]2CCC(N)=O	C06507	C/C1=C2/N=C(/C=C3\N=C(/C(C)=C4/[C@@H](CCC(N)=O)[C@](C)(CC(N)=O)[C@](C)(C5N=C1[C@](C)(CCC(=O)NC[C@@H](C)O)[C@H]5CC(N)=O)N4[Co+]C[C@H]1O[C@@H](n4cnc5c(N)ncnc54)[C@H](O)[C@@H]1O)[C@@](C)(CC(N)=O)[C@@H]3CCC(N)=O)C(C)(C)[C@@H]2CCC(N)=O	C06508	R07302
M00122	3	1	C/C1=C2/N=C(/C=C3\N=C(/C(C)=C4/[C@@H](CCC(N)=O)[C@](C)(CC(N)=O)[C@](C)(C5N=C1[C@](C)(CCC(=O)NC[C@@H](C)OP(=O)(O)O)[C@H]5CC(N)=O)N4[Co+]C[C@H]1O[C@@H](n4cnc5c(N)ncnc54)[C@H](O)[C@@H]1O)[C@@](C)(CC(N)=O)[C@@H]3CCC(N)=O)C(C)(C)[C@@H]2CCC(N)=O	C06509	C/C1=C2/N=C(/C=C3\N=C(/C(C)=C4/[C@@H](CCC(N)=O)[C@](C)(CC(N)=O)[C@](C)(C5N=C1[C@](C)(CCC(=O)NC[C@@H](C)OP(=O)(O)OP(=O)(O)OC[C@H]1O[C@@H](n6cnc7c(=O)[nH]c(N)nc76)[C@H](O)[C@@H]1O)[C@H]5CC(N)=O)N4[Co+]C[C@H]1O[C@@H](n4cnc5c(N)ncnc54)[C@H](O)[C@@H]1O)[C@@](C)(CC(N)=O)[C@@H]3CCC(N)=O)C(C)(C)[C@@H]2CCC(N)=O	C06510	R05222
M00123	1	1	CC(N)C(=O)CCCCCC(=O)O	C01092	CC(N)C(N)CCCCCC(=O)O	C01037	R03231
M00123	1	2	CC(N)C(N)CCCCCC(=O)O	C01037	CC1NC(=O)NC1CCCCCC(=O)O	C01909	R03182
M00124	1	1	O=C[C@H](O)[C@H](O)COP(=O)(O)O	C00279	O=C(O)[C@H](O)[C@H](O)COP(=O)(O)O	C03393	R01825
M00124	1	2	O=C(O)[C@H](O)[C@H](O)COP(=O)(O)O	C03393	O=C(O)C(=O)[C@H](O)COP(=O)(O)O	C06054	R04210
M00124	1	3	O=C(O)C(=O)[C@H](O)COP(=O)(O)O	C06054	N[C@H](C(=O)O)[C@H](O)COP(=O)(O)O	C06055	R05085
M00124	1	4	N[C@H](C(=O)O)[C@H](O)COP(=O)(O)O	C06055	N[C@H](C(=O)O)C(=O)COP(=O)(O)O	C07335	R05681
M00124	1	5	N[C@H](C(=O)O)C(=O)COP(=O)(O)O	C07335	NCC(=O)COP(=O)(O)O	C11638	R07406
M00124	2	1	O=C(O)C(=O)[C@H](O)COP(=O)(O)O	C06054	N[C@H](C(=O)O)[C@H](O)COP(=O)(O)O	C06055	R05085
M00124	2	2	N[C@H](C(=O)O)[C@H](O)COP(=O)(O)O	C06055	N[C@H](C(=O)O)C(=O)COP(=O)(O)O	C07335	R05681
M00124	2	3	N[C@H](C(=O)O)C(=O)COP(=O)(O)O	C07335	NCC(=O)COP(=O)(O)O	C11638	R07406
M00124	2	4	NCC(=O)COP(=O)(O)O	C11638	Cc1ncc(COP(=O)(O)O)c(CO)c1O	C00627	R05838
M00124	2	5	Cc1ncc(COP(=O)(O)O)c(CO)c1O	C00627	Cc1ncc(COP(=O)(O)O)c(C=O)c1O	C00018	R00278
M00125	1	1	Nc1nc2c(ncn2[C@@H]2O[C@H](COP(=O)(O)OP(=O)(O)OP(=O)(O)O)[C@@H](O)[C@H]2O)c(=O)[nH]1	C00044	Nc1nc(N[C@@H]2O[C@H](COP(=O)(O)O)[C@@H](O)[C@H]2O)c(N)c(=O)[nH]1	C01304	R00425
M00125	1	2	Nc1nc(N[C@@H]2O[C@H](COP(=O)(O)O)[C@@H](O)[C@H]2O)c(N)c(=O)[nH]1	C01304	Nc1c(N[C@@H]2O[C@H](COP(=O)(O)O)[C@@H](O)[C@H]2O)[nH]c(=O)[nH]c1=O	C01268	R03459
M00125	1	3	Nc1c(N[C@@H]2O[C@H](COP(=O)(O)O)[C@@H](O)[C@H]2O)[nH]c(=O)[nH]c1=O	C01268	Nc1c(NC[C@H](O)[C@H](O)[C@H](O)COP(=O)(O)O)[nH]c(=O)[nH]c1=O	C04454	R03458
M00125	1	4	Nc1c(NC[C@H](O)[C@H](O)[C@H](O)COP(=O)(O)O)[nH]c(=O)[nH]c1=O	C04454	Nc1c(NC[C@H](O)[C@H](O)[C@H](O)CO)[nH]c(=O)[nH]c1=O	C04732	R07280
M00125	1	5	Nc1c(NC[C@H](O)[C@H](O)[C@H](O)CO)[nH]c(=O)[nH]c1=O	C04732	Cc1nc2c(=O)[nH]c(=O)nc-2n(C[C@H](O)[C@H](O)[C@H](O)CO)c1C	C04332	R04457
M00125	2	1	Nc1c(NC[C@H](O)[C@H](O)[C@H](O)COP(=O)(O)O)[nH]c(=O)[nH]c1=O	C04454	Nc1c(NC[C@H](O)[C@H](O)[C@H](O)CO)[nH]c(=O)[nH]c1=O	C04732	R07280
M00125	2	2	Nc1c(NC[C@H](O)[C@H](O)[C@H](O)CO)[nH]c(=O)[nH]c1=O	C04732	Cc1nc2c(=O)[nH]c(=O)nc-2n(C[C@H](O)[C@H](O)[C@H](O)CO)c1C	C04332	R04457
M00125	2	3	Cc1nc2c(=O)[nH]c(=O)nc-2n(C[C@H](O)[C@H](O)[C@H](O)CO)c1C	C04332	Cc1cc2nc3c(=O)[nH]c(=O)nc-3n(C[C@H](O)[C@H](O)[C@H](O)CO)c2cc1C	C00255	R00066
M00125	2	4	Cc1cc2nc3c(=O)[nH]c(=O)nc-3n(C[C@H](O)[C@H](O)[C@H](O)CO)c2cc1C	C00255	Cc1cc2nc3c(=O)[nH]c(=O)nc-3n(C[C@H](O)[C@H](O)[C@H](O)COP(=O)(O)O)c2cc1C	C00061	R00549
M00125	2	5	Cc1cc2nc3c(=O)[nH]c(=O)nc-3n(C[C@H](O)[C@H](O)[C@H](O)COP(=O)(O)O)c2cc1C	C00061	Cc1cc2nc3c(=O)[nH]c(=O)nc-3n(C[C@H](O)[C@H](O)[C@H](O)COP(=O)(O)OP(=O)(O)OC[C@H]3O[C@@H](n4cnc5c(N)ncnc54)[C@H](O)[C@@H]3O)c2cc1C	C00016	R00161
M00126	1	1	Nc1nc2c(ncn2[C@@H]2O[C@H](COP(=O)(O)OP(=O)(O)OP(=O)(O)O)[C@@H](O)[C@H]2O)c(=O)[nH]1	C00044	Nc1nc(N[C@@H]2O[C@H](COP(=O)(O)OP(=O)(O)OP(=O)(O)O)[C@@H](O)[C@H]2O)c(NC=O)c(=O)[nH]1	C05922	R00428
M00126	1	2	Nc1nc(N[C@@H]2O[C@H](COP(=O)(O)OP(=O)(O)OP(=O)(O)O)[C@@H](O)[C@H]2O)c(NC=O)c(=O)[nH]1	C05922	Nc1nc(N[C@@H]2O[C@H](COP(=O)(O)OP(=O)(O)OP(=O)(O)O)[C@@H](O)[C@H]2O)c(N)c(=O)[nH]1	C05923	R05046
M00126	1	3	Nc1nc(N[C@@H]2O[C@H](COP(=O)(O)OP(=O)(O)OP(=O)(O)O)[C@@H](O)[C@H]2O)c(N)c(=O)[nH]1	C05923	Nc1nc(NCC(=O)C(O)C(O)COP(=O)(O)OP(=O)(O)OP(=O)(O)O)c(N)c(=O)[nH]1	C06148	R05048
M00126	1	4	Nc1nc(NCC(=O)C(O)C(O)COP(=O)(O)OP(=O)(O)OP(=O)(O)O)c(N)c(=O)[nH]1	C06148	Nc1nc2c(c(=O)[nH]1)N=C([C@H](O)[C@H](O)COP(=O)(O)OP(=O)(O)OP(=O)(O)O)CN2	C04895	R04639
M00126	1	5	Nc1nc2c(c(=O)[nH]1)N=C([C@H](O)[C@H](O)COP(=O)(O)OP(=O)(O)OP(=O)(O)O)CN2	C04895	Nc1nc2c(c(=O)[nH]1)N=C([C@H](O)[C@H](O)COP(=O)(O)O)CN2	C05925	R04638
M00126	2	1	Nc1nc2c(c(=O)[nH]1)N=C([C@H](O)[C@H](O)CO)CN2	C04874	Nc1nc2c(c(=O)[nH]1)N=C(CO)CN2	C01300	R03504
M00126	2	2	Nc1nc2c(c(=O)[nH]1)N=C(CO)CN2	C01300	Nc1nc2c(c(=O)[nH]1)N=C(COP(=O)(O)OP(=O)(O)O)CN2	C04807	R03503
M00126	2	3	Nc1nc2c(c(=O)[nH]1)N=C(COP(=O)(O)OP(=O)(O)O)CN2	C04807	Nc1nc2c(c(=O)[nH]1)N=C(CNc1ccc(C(=O)O)cc1)CN2	C00921	R03067
M00126	2	4	Nc1nc2c(c(=O)[nH]1)N=C(CNc1ccc(C(=O)O)cc1)CN2	C00921	Nc1nc2c(c(=O)[nH]1)N=C(CNc1ccc(C(=O)N[C@@H](CCC(=O)O)C(=O)O)cc1)CN2	C00415	R02237
M00126	2	5	Nc1nc2c(c(=O)[nH]1)N=C(CNc1ccc(C(=O)N[C@@H](CCC(=O)O)C(=O)O)cc1)CN2	C00415	Nc1nc2c(c(=O)[nH]1)N[C@@H](CNc1ccc(C(=O)N[C@@H](CCC(=O)O)C(=O)O)cc1)CN2	C00101	R00936;R00939
M00127	1	1	Nc1cncn1[C@@H]1O[C@H](COP(=O)(O)O)[C@@H](O)[C@H]1O	C03373	Cc1ncc(COP(=O)(O)O)c(N)n1	C04556	R03472
M00127	1	2	Cc1ncc(COP(=O)(O)O)c(N)n1	C04556	Cc1ncc(COP(=O)(O)OP(=O)(O)O)c(N)n1	C04752	R04509
M00127	1	3	Cc1ncc(COP(=O)(O)OP(=O)(O)O)c(N)n1	C04752	Cc1ncc(C[n+]2csc(CCOP(=O)(O)O)c2C)c(N)n1	C01081	R03223
M00127	1	4	Cc1ncc(C[n+]2csc(CCOP(=O)(O)O)c2C)c(N)n1	C01081	Cc1ncc(C[n+]2csc(CCOP(=O)(O)OP(=O)(O)O)c2C)c(N)n1	C00068	R00617
M00129	1	1	O=P(O)(O)O[C@H]1O[C@H](CO)[C@@H](O)[C@H](O)[C@H]1O	C00103	O=c1ccn([C@@H]2O[C@H](COP(=O)(O)OP(=O)(O)O[C@H]3O[C@H](CO)[C@@H](O)[C@H](O)[C@H]3O)[C@@H](O)[C@H]2O)c(=O)[nH]1	C00029	R00289
M00129	1	2	O=c1ccn([C@@H]2O[C@H](COP(=O)(O)OP(=O)(O)O[C@H]3O[C@H](CO)[C@@H](O)[C@H](O)[C@H]3O)[C@@H](O)[C@H]2O)c(=O)[nH]1	C00029	O=C(O)[C@H]1O[C@H](OP(=O)(O)OP(=O)(O)OC[C@H]2O[C@@H](n3ccc(=O)[nH]c3=O)[C@H](O)[C@@H]2O)[C@H](O)[C@@H](O)[C@@H]1O	C00167	R00286
M00129	2	1	O=C(O)[C@H]1OC(O)[C@H](O)[C@@H](O)[C@@H]1O	C00191	O=C(O)[C@@H](O)[C@@H](O)[C@H](O)[C@@H](O)CO	C00800	R01481
M00129	2	2	O=C(O)[C@@H](O)[C@@H](O)[C@H](O)[C@@H](O)CO	C00800	O=C1O[C@H]([C@@H](O)CO)[C@H](O)[C@@H]1O	C01040	R02933
M00129	2	3	O=C1O[C@H]([C@@H](O)CO)[C@H](O)[C@@H]1O	C01040	O=C1O[C@H]([C@@H](O)CO)[C@H](O)C1=O	C03289	R03184
M00129	2	4	O=C1O[C@H]([C@@H](O)CO)[C@H](O)C1=O	C03289	O=C1O[C@H]([C@@H](O)CO)C(O)=C1O	C00072	R00647
M00130	1	1	O=P(O)(O)O[C@H]1[C@H](O)[C@@H](OP(=O)(O)O)[C@H](OP(=O)(O)O)[C@@H](O)[C@H]1O	C01245	O=P(O)(O)O[C@H]1[C@@H](O)[C@@H](OP(=O)(O)O)[C@H](O)[C@@H](OP(=O)(O)O)[C@@H]1OP(=O)(O)O	C01272	R03433
M00131	1	1	O=P(O)(O)O[C@H]1[C@@H](O)[C@@H](OP(=O)(O)O)[C@H](O)[C@@H](OP(=O)(O)O)[C@@H]1OP(=O)(O)O	C01272	O=P(O)(O)O[C@H]1[C@@H](O)[C@@H](OP(=O)(O)O)[C@H](O)[C@@H](O)[C@@H]1OP(=O)(O)O	C01243	R03430
M00131	1	2	O=P(O)(O)O[C@H]1[C@@H](O)[C@@H](OP(=O)(O)O)[C@H](O)[C@@H](O)[C@@H]1OP(=O)(O)O	C01243	O=P(O)(O)O[C@H]1[C@@H](O)[C@@H](O)[C@H](O)[C@@H](O)[C@@H]1OP(=O)(O)O	C04063	R03427
M00131	1	3	O=P(O)(O)O[C@H]1[C@@H](O)[C@@H](O)[C@H](O)[C@@H](O)[C@@H]1OP(=O)(O)O	C04063	O=P(O)(O)O[C@H]1[C@@H](O)[C@@H](O)[C@H](O)[C@@H](O)[C@@H]1O	C04006	R04372
M00131	1	4	O=P(O)(O)O[C@H]1[C@@H](O)[C@@H](O)[C@H](O)[C@@H](O)[C@@H]1O	C04006	O[C@H]1[C@H](O)[C@@H](O)[C@H](O)[C@@H](O)[C@H]1O	C00137	R01187
M00132	1	1	O=P(O)(O)O[C@H]1[C@@H](O)[C@@H](OP(=O)(O)O)[C@H](O)[C@@H](O)[C@@H]1OP(=O)(O)O	C01243	O=P(O)(O)O[C@@H]1[C@@H](OP(=O)(O)O)[C@@H](O)[C@@H](OP(=O)(O)O)[C@H](OP(=O)(O)O)[C@H]1O	C04477	R03429
M00132	1	2	O=P(O)(O)O[C@@H]1[C@@H](OP(=O)(O)O)[C@@H](O)[C@@H](OP(=O)(O)O)[C@H](OP(=O)(O)O)[C@H]1O	C04477	O=P(O)(O)O[C@H]1[C@@H](O)[C@@H](OP(=O)(O)O)[C@H](OP(=O)(O)O)[C@@H](OP(=O)(O)O)[C@@H]1OP(=O)(O)O	C01284	R03478
M00132	1	3	O=P(O)(O)O[C@H]1[C@@H](O)[C@@H](OP(=O)(O)O)[C@H](OP(=O)(O)O)[C@@H](OP(=O)(O)O)[C@@H]1OP(=O)(O)O	C01284	O=P(O)(O)O[C@H]1[C@H](OP(=O)(O)O)[C@@H](OP(=O)(O)O)[C@H](OP(=O)(O)O)[C@@H](OP(=O)(O)O)[C@H]1OP(=O)(O)O	C01204	R05202
M00133	1	1	N=C(N)NCCC[C@H](N)C(=O)O	C00062	N=C(N)NCCCCN	C00179	R00566
M00133	1	2	N=C(N)NCCCCN	C00179	NCCCCN	C00134	R01157
M00133	1	3	NCCCCN	C00134	NCCCCNCCCN	C00315	R01920
M00134	1	1	N=C(N)NCCC[C@H](N)C(=O)O	C00062	NCCC[C@H](N)C(=O)O	C00077	R00551
M00134	1	2	NCCC[C@H](N)C(=O)O	C00077	NCCCCN	C00134	R00670
M00135	1	1	NCCCCN	C00134	CC(=O)NCCCCN	C02714	R01154;R01156
M00135	1	2	CC(=O)NCCCCN	C02714	CC(=O)NCCCC=O	C05936	R04025
M00135	1	3	CC(=O)NCCCC=O	C05936	CC(=O)NCCCC(=O)O	C02946	R05050
M00135	1	4	CC(=O)NCCCC(=O)O	C02946	NCCCC(=O)O	C00334	R01987
M00136	1	1	NCCCCN	C00134	NCCCCNC(=O)CC[C@H](N)C(=O)O	C15699	R07414
M00136	1	2	NCCCCNC(=O)CC[C@H](N)C(=O)O	C15699	N[C@@H](CCC(=O)NCCCC=O)C(=O)O	C15700	R07415
M00136	1	3	N[C@@H](CCC(=O)NCCCC=O)C(=O)O	C15700	N[C@@H](CCC(=O)NCCCC(=O)O)C(=O)O	C15767	R07417;R07418
M00136	1	4	N[C@@H](CCC(=O)NCCCC(=O)O)C(=O)O	C15767	NCCCC(=O)O	C00334	R07419
M00137	1	1	N[C@@H](Cc1ccccc1)C(=O)O	C00079	O=C(O)/C=C/c1ccccc1	C00423	R00697
M00137	2	1	O=C(O)/C=C/c1ccc(O)cc1	C00811	CC(C)(COP(=O)(O)OP(=O)(O)OC[C@H]1O[C@@H](n2cnc3c(N)ncnc32)[C@H](O)[C@@H]1OP(=O)(O)O)[C@@H](O)C(=O)NCCC(=O)NCCSC(=O)/C=C/c1ccc(O)cc1	C00223	R01616
M00137	2	2	CC(C)(COP(=O)(O)OP(=O)(O)OC[C@H]1O[C@@H](n2cnc3c(N)ncnc32)[C@H](O)[C@@H]1OP(=O)(O)O)[C@@H](O)C(=O)NCCC(=O)NCCSC(=O)/C=C/c1ccc(O)cc1	C00223	O=C(/C=C/c1ccc(O)cc1)c1c(O)cc(O)cc1O	C06561	R01613
M00137	2	3	O=C(/C=C/c1ccc(O)cc1)c1c(O)cc(O)cc1O	C06561	O=C1C[C@@H](c2ccc(O)cc2)Oc2cc(O)cc(O)c21	C00509	R02446
M00138	1	1	O=C1C[C@@H](c2ccc(O)cc2)Oc2cc(O)cc(O)c21	C00509	O=C1c2c(O)cc(O)cc2O[C@H](c2ccc(O)cc2)[C@H]1O	C00974	R02444
M00138	1	2	O=C1c2c(O)cc(O)cc2O[C@H](c2ccc(O)cc2)[C@H]1O	C00974	Oc1ccc([C@H]2Oc3cc(O)cc(O)c3[C@H](O)[C@@H]2O)cc1	C03648	R03123
M00138	1	3	Oc1ccc([C@H]2Oc3cc(O)cc(O)c3[C@H](O)[C@@H]2O)cc1	C03648	Oc1ccc(-c2[o+]c3cc(O)cc(O)c3cc2O)cc1	C05904	R04276
M00140	1	1	Nc1nc2c(c(=O)[nH]1)N[C@@H](CNc1ccc(C(=O)N[C@@H](CCC(=O)O)C(=O)O)cc1)CN2	C00101	Nc1nc2c(c(=O)[nH]1)N1CN(c3ccc(C(=O)N[C@@H](CCC(=O)O)C(=O)O)cc3)C[C@H]1CN2	C00143	R00945
M00140	1	2	Nc1nc2c(c(=O)[nH]1)N1CN(c3ccc(C(=O)N[C@@H](CCC(=O)O)C(=O)O)cc3)C[C@H]1CN2	C00143	Nc1nc2c(c(=O)[nH]1)[N+]1=CN(c3ccc(C(=O)N[C@@H](CCC(=O)O)C(=O)O)cc3)C[C@H]1CN2	C00445	R01220
M00140	1	3	Nc1nc2c(c(=O)[nH]1)[N+]1=CN(c3ccc(C(=O)N[C@@H](CCC(=O)O)C(=O)O)cc3)C[C@H]1CN2	C00445	Nc1nc2c(c(=O)[nH]1)N[C@@H](CN(C=O)c1ccc(C(=O)N[C@@H](CCC(=O)O)C(=O)O)cc1)CN2	C00234	R01655
M00141	1	1	Nc1nc2c(c(=O)[nH]1)N[C@@H](CNc1ccc(C(=O)N[C@@H](CCC(=O)O)C(=O)O)cc1)CN2	C00101	Nc1nc2c(c(=O)[nH]1)N1CN(c3ccc(C(=O)N[C@@H](CCC(=O)O)C(=O)O)cc3)C[C@H]1CN2	C00143	R00945
M00141	1	2	Nc1nc2c(c(=O)[nH]1)N1CN(c3ccc(C(=O)N[C@@H](CCC(=O)O)C(=O)O)cc3)C[C@H]1CN2	C00143	Nc1nc2c(c(=O)[nH]1)[N+]1=CN(c3ccc(C(=O)N[C@@H](CCC(=O)O)C(=O)O)cc3)C[C@H]1CN2	C00445	R01218;R01220
M00141	1	3	Nc1nc2c(c(=O)[nH]1)[N+]1=CN(c3ccc(C(=O)N[C@@H](CCC(=O)O)C(=O)O)cc3)C[C@H]1CN2	C00445	Nc1nc2c(c(=O)[nH]1)N[C@@H](CN(C=O)c1ccc(C(=O)N[C@@H](CCC(=O)O)C(=O)O)cc1)CN2	C00234	R01655
M00148	1	1	O=C(O)CCC(=O)O	C00042	O=C(O)/C=C/C(=O)O	C00122	R02164
M00149	1	1	O=C(O)CCC(=O)O	C00042	O=C(O)/C=C/C(=O)O	C00122	R02164
M00150	1	1	O=C(O)CCC(=O)O	C00042	O=C(O)/C=C/C(=O)O	C00122	R02164
M00165	1	1	O=C(CO)[C@H](O)[C@H](O)COP(=O)(O)O	C00199	O=C(COP(=O)(O)O)[C@H](O)[C@H](O)COP(=O)(O)O	C01182	R01523
M00165	1	2	O=C(COP(=O)(O)O)[C@H](O)[C@H](O)COP(=O)(O)O	C01182	O=C(O)[C@H](O)COP(=O)(O)O	C00197	R00024
M00165	1	3	O=C(O)[C@H](O)COP(=O)(O)O	C00197	O=C(OP(=O)(O)O)[C@H](O)COP(=O)(O)O	C00236	R01512
M00165	1	4	O=C(OP(=O)(O)O)[C@H](O)COP(=O)(O)O	C00236	O=C[C@H](O)COP(=O)(O)O	C00118	R01061;R01063
M00165	1	5	O=C[C@H](O)COP(=O)(O)O	C00118	O=P(O)(O)OC[C@H]1OC(O)(COP(=O)(O)O)[C@@H](O)[C@@H]1O	C00354	R01068
M00165	2	1	O=P(O)(O)OC[C@H]1OC(O)(CO)[C@@H](O)[C@@H]1O	C00085	O=C[C@H](O)[C@H](O)COP(=O)(O)O	C00279	R01067
M00165	2	2	O=C[C@H](O)[C@H](O)COP(=O)(O)O	C00279	O=C(COP(=O)(O)O)[C@@H](O)[C@H](O)[C@H](O)[C@H](O)COP(=O)(O)O	C00447	R01829
M00165	2	3	O=C(COP(=O)(O)O)[C@@H](O)[C@H](O)[C@H](O)[C@H](O)COP(=O)(O)O	C00447	O=C(CO)[C@@H](O)[C@H](O)[C@H](O)[C@H](O)COP(=O)(O)O	C05382	R01845
M00165	3	1	O=P(O)(O)OC[C@H]1OC(O)[C@H](O)[C@@H]1O	C00117	O=C(CO)[C@H](O)[C@H](O)COP(=O)(O)O	C00199	R01056
M00166	1	1	O=C(CO)[C@H](O)[C@H](O)COP(=O)(O)O	C00199	O=C(COP(=O)(O)O)[C@H](O)[C@H](O)COP(=O)(O)O	C01182	R01523
M00166	1	2	O=C(COP(=O)(O)O)[C@H](O)[C@H](O)COP(=O)(O)O	C01182	O=C(O)[C@H](O)COP(=O)(O)O	C00197	R00024
M00166	1	3	O=C(O)[C@H](O)COP(=O)(O)O	C00197	O=C(OP(=O)(O)O)[C@H](O)COP(=O)(O)O	C00236	R01512
M00166	1	4	O=C(OP(=O)(O)O)[C@H](O)COP(=O)(O)O	C00236	O=C[C@H](O)COP(=O)(O)O	C00118	R01061;R01063
M00167	1	1	O=C[C@H](O)COP(=O)(O)O	C00118	O=P(O)(O)OC[C@H]1OC(O)(COP(=O)(O)O)[C@@H](O)[C@@H]1O	C00354	R01068
M00167	2	1	O=P(O)(O)OC[C@H]1OC(O)(CO)[C@@H](O)[C@@H]1O	C00085	O=C[C@H](O)[C@H](O)COP(=O)(O)O	C00279	R01067
M00167	2	2	O=C[C@H](O)[C@H](O)COP(=O)(O)O	C00279	O=C(COP(=O)(O)O)[C@@H](O)[C@H](O)[C@H](O)[C@H](O)COP(=O)(O)O	C00447	R01829
M00167	2	3	O=C(COP(=O)(O)O)[C@@H](O)[C@H](O)[C@H](O)[C@H](O)COP(=O)(O)O	C00447	O=C(CO)[C@@H](O)[C@H](O)[C@H](O)[C@H](O)COP(=O)(O)O	C05382	R01845
M00167	3	1	O=P(O)(O)OC[C@H]1OC(O)[C@H](O)[C@@H]1O	C00117	O=C(CO)[C@H](O)[C@H](O)COP(=O)(O)O	C00199	R01056
M00168	1	1	O=C=O	C00011	O=C(O)CC(=O)C(=O)O	C00036	R00345
M00168	1	2	O=C(O)CC(=O)C(=O)O	C00036	O=C(O)C[C@H](O)C(=O)O	C00149	R00342
M00169	1	1	O=C(O)C[C@H](O)C(=O)O	C00149	CC(=O)C(=O)O	C00022	R00216
M00169	1	2	CC(=O)C(=O)O	C00022	C=C(OP(=O)(O)O)C(=O)O	C00074	R00206
M00170	1	1	C=C(OP(=O)(O)O)C(=O)O	C00074	O=C(O)CC(=O)C(=O)O	C00036	R00345
M00170	1	2	O=C(O)CC(=O)C(=O)O	C00036	N[C@@H](CC(=O)O)C(=O)O	C00049	R00355
M00170	1	3	N[C@@H](CC(=O)O)C(=O)O	C00049	O=C(O)CC(=O)C(=O)O	C00036	R00355
M00170	1	4	O=C(O)CC(=O)C(=O)O	C00036	O=C=O	C00011	R00341
M00171	1	1	C=C(OP(=O)(O)O)C(=O)O	C00074	O=C(O)CC(=O)C(=O)O	C00036	R00345
M00171	1	2	O=C(O)CC(=O)C(=O)O	C00036	N[C@@H](CC(=O)O)C(=O)O	C00049	R00355
M00171	1	3	N[C@@H](CC(=O)O)C(=O)O	C00049	O=C(O)CC(=O)C(=O)O	C00036	R00355
M00171	1	4	O=C(O)CC(=O)C(=O)O	C00036	O=C(O)C[C@H](O)C(=O)O	C00149	R00342
M00171	1	5	O=C(O)C[C@H](O)C(=O)O	C00149	CC(=O)C(=O)O	C00022	R00214
M00171	2	1	O=C(O)CC(=O)C(=O)O	C00036	O=C(O)C[C@H](O)C(=O)O	C00149	R00342
M00171	2	2	O=C(O)C[C@H](O)C(=O)O	C00149	CC(=O)C(=O)O	C00022	R00214
M00171	2	3	CC(=O)C(=O)O	C00022	C[C@H](N)C(=O)O	C00041	R00258
M00171	2	4	C[C@H](N)C(=O)O	C00041	CC(=O)C(=O)O	C00022	R00258
M00171	2	5	CC(=O)C(=O)O	C00022	C=C(OP(=O)(O)O)C(=O)O	C00074	R00206
M00172	1	1	C=C(OP(=O)(O)O)C(=O)O	C00074	O=C(O)CC(=O)C(=O)O	C00036	R00345
M00172	1	2	O=C(O)CC(=O)C(=O)O	C00036	O=C(O)C[C@H](O)C(=O)O	C00149	R00343
M00172	1	3	O=C(O)C[C@H](O)C(=O)O	C00149	CC(=O)C(=O)O	C00022	R00216
M00173	1	1	CC(=O)SCCNC(=O)CCNC(=O)[C@H](O)C(C)(C)COP(=O)(O)OP(=O)(O)OC[C@H]1O[C@@H](n2cnc3c(N)ncnc32)[C@H](O)[C@@H]1OP(=O)(O)O	C00024	CC(=O)C(=O)O	C00022	R01196;R10866
M00173	1	2	CC(=O)C(=O)O	C00022	C=C(OP(=O)(O)O)C(=O)O	C00074	R00199;R00206
M00173	1	3	C=C(OP(=O)(O)O)C(=O)O	C00074	O=C(O)CC(=O)C(=O)O	C00036	R00345
M00173	1	4	O=C(O)CC(=O)C(=O)O	C00036	O=C(O)C[C@H](O)C(=O)O	C00149	R00342
M00173	1	5	O=C(O)C[C@H](O)C(=O)O	C00149	O=C(O)/C=C/C(=O)O	C00122	R01082
M00173	2	1	O=C(O)CCC(=O)O	C00042	CC(C)(COP(=O)(O)OP(=O)(O)OC[C@H]1O[C@@H](n2cnc3c(N)ncnc32)[C@H](O)[C@@H]1OP(=O)(O)O)[C@@H](O)C(=O)NCCC(=O)NCCSC(=O)CCC(=O)O	C00091	R00405
M00173	2	2	CC(C)(COP(=O)(O)OP(=O)(O)OC[C@H]1O[C@@H](n2cnc3c(N)ncnc32)[C@H](O)[C@@H]1OP(=O)(O)O)[C@@H](O)C(=O)NCCC(=O)NCCSC(=O)CCC(=O)O	C00091	O=C(O)CCC(=O)C(=O)O	C00026	R01197
M00173	2	3	O=C(O)CCC(=O)C(=O)O	C00026	O=C(O)CC(C(=O)O)C(O)C(=O)O	C00311	R00267
M00173	2	4	O=C(O)CC(C(=O)O)C(O)C(=O)O	C00311	O=C(O)/C=C(/CC(=O)O)C(=O)O	C00417	R01900
M00173	2	5	O=C(O)/C=C(/CC(=O)O)C(=O)O	C00417	O=C(O)CC(O)(CC(=O)O)C(=O)O	C00158	R01325
M00173	3	1	CC(C)(COP(=O)(O)OP(=O)(O)OC[C@H]1O[C@@H](n2cnc3c(N)ncnc32)[C@H](O)[C@@H]1OP(=O)(O)O)[C@@H](O)C(=O)NCCC(=O)NCCSC(=O)C[C@@](O)(CC(=O)O)C(=O)O	C00566	CC(=O)SCCNC(=O)CCNC(=O)[C@H](O)C(C)(C)COP(=O)(O)OP(=O)(O)OC[C@H]1O[C@@H](n2cnc3c(N)ncnc32)[C@H](O)[C@@H]1OP(=O)(O)O	C00024	R00354
M00174	1	1	C	C01438	CO	C00132	R01142;R09518
M00174	1	2	CO	C00132	C=O	C00067	R00608;R01146
M00176	1	1	O=S(=O)(O)O	C00059	Nc1ncnc2c1ncn2[C@@H]1O[C@H](COP(=O)(O)OS(=O)(=O)O)[C@@H](O)[C@H]1O	C00224	R00529
M00176	1	2	Nc1ncnc2c1ncn2[C@@H]1O[C@H](COP(=O)(O)OS(=O)(=O)O)[C@@H](O)[C@H]1O	C00224	Nc1ncnc2c1ncn2[C@@H]1O[C@H](COP(=O)(O)OS(=O)(=O)O)[C@@H](OP(=O)(O)O)[C@H]1O	C00053	R00509
M00176	2	1	O=S(O)O	C00094	S	C00283	R00858;R00859
M00307	1	1	CC(=O)C(=O)O	C00022	CC(=O)SCCNC(=O)CCNC(=O)[C@H](O)C(C)(C)COP(=O)(O)OP(=O)(O)OC[C@H]1O[C@@H](n2cnc3c(N)ncnc32)[C@H](O)[C@@H]1OP(=O)(O)O	C00024	R00209;R01196
M00308	1	1	O=C(O)[C@H](O)[C@@H](O)[C@H](O)[C@H](O)CO	C00257	O=C(O)C(=O)C[C@H](O)[C@H](O)CO	C00204	R01538
M00308	1	2	O=C(O)C(=O)C[C@H](O)[C@H](O)CO	C00204	O=C(O)C(=O)C[C@H](O)[C@H](O)COP(=O)(O)O	C04442	R01541
M00308	1	3	O=C(O)C(=O)C[C@H](O)[C@H](O)COP(=O)(O)O	C04442	O=C[C@H](O)COP(=O)(O)O	C00118	R05605
M00308	1	4	O=C[C@H](O)COP(=O)(O)O	C00118	O=C(O)[C@H](O)COP(=O)(O)O	C00197	R01058;R10860
M00309	1	1	O=C(O)[C@H](O)[C@@H](O)[C@H](O)[C@H](O)CO	C00257	O=C(O)C(=O)C[C@H](O)[C@H](O)CO	C00204	R01538
M00309	1	2	O=C(O)C(=O)C[C@H](O)[C@H](O)CO	C00204	O=C[C@H](O)CO	C00577	R08570
M00309	1	3	O=C[C@H](O)CO	C00577	O=C(O)[C@H](O)CO	C00258	R08571;R10324;R10615
M00338	1	1	N[C@@H](CO)C(=O)O	C00065	N[C@@H](CCSC[C@H](N)C(=O)O)C(=O)O	C02291	R01290
M00338	1	2	N[C@@H](CCSC[C@H](N)C(=O)O)C(=O)O	C02291	N[C@@H](CS)C(=O)O	C00097	R01001
M00344	1	1	C=O	C00067	O=C(CO)CO	C00184	R01440
M00344	1	2	O=C(CO)CO	C00184	O=C(CO)COP(=O)(O)O	C00111	R01011
M00344	1	3	O=C(CO)COP(=O)(O)O	C00111	O=P(O)(O)OC[C@H]1OC(O)(COP(=O)(O)O)[C@@H](O)[C@@H]1O	C00354	R01068
M00345	1	1	C=O	C00067	O=C([C@H](O)CO)[C@H](O)[C@H](O)COP(=O)(O)O	C06019	R05338
M00345	1	2	O=C([C@H](O)CO)[C@H](O)[C@H](O)COP(=O)(O)O	C06019	O=P(O)(O)OC[C@H]1OC(O)(CO)[C@@H](O)[C@@H]1O	C00085	R05339
M00345	2	1	O=P(O)(O)OC[C@H]1OC(O)(COP(=O)(O)O)[C@@H](O)[C@@H]1O	C00354	O=C(CO)COP(=O)(O)O	C00111	R01068
M00346	1	1	NCC(=O)O	C00037	N[C@@H](CO)C(=O)O	C00065	R00945
M00346	1	2	N[C@@H](CO)C(=O)O	C00065	O=C(O)C(=O)CO	C00168	R00588
M00346	1	3	O=C(O)C(=O)CO	C00168	O=C(O)[C@H](O)CO	C00258	R01388
M00346	1	4	O=C(O)[C@H](O)CO	C00258	O=C(O)[C@@H](CO)OP(=O)(O)O	C00631	R08572
M00346	1	5	O=C(O)[C@@H](CO)OP(=O)(O)O	C00631	C=C(OP(=O)(O)O)C(=O)O	C00074	R00658
M00346	2	1	C=C(OP(=O)(O)O)C(=O)O	C00074	O=C(O)CC(=O)C(=O)O	C00036	R00345
M00346	2	2	O=C(O)CC(=O)C(=O)O	C00036	O=C(O)C[C@H](O)C(=O)O	C00149	R00342
M00346	2	3	O=C(O)C[C@H](O)C(=O)O	C00149	CC(C)(COP(=O)(O)OP(=O)(O)OC[C@H]1O[C@@H](n2cnc3c(N)ncnc32)[C@H](O)[C@@H]1OP(=O)(O)O)[C@@H](O)C(=O)NCCC(=O)NCCSC(=O)C[C@H](O)C(=O)O	C04348	R01256
M00346	2	4	CC(C)(COP(=O)(O)OP(=O)(O)OC[C@H]1O[C@@H](n2cnc3c(N)ncnc32)[C@H](O)[C@@H]1OP(=O)(O)O)[C@@H](O)C(=O)NCCC(=O)NCCSC(=O)C[C@H](O)C(=O)O	C04348	O=CC(=O)O	C00048	R00473
M00346	2	5	O=CC(=O)O	C00048	NCC(=O)O	C00037	R00588
M00350	1	1	N[C@@H](Cc1ccccc1)C(=O)O	C00079	O=C(O)/C=C/c1ccccc1	C00423	R00697
M00350	2	1	O=C(O)/C=C/c1ccc(O)cc1	C00811	CC(C)(COP(=O)(O)OP(=O)(O)OC[C@H]1O[C@@H](n2cnc3c(N)ncnc32)[C@H](O)[C@@H]1OP(=O)(O)O)[C@@H](O)C(=O)NCCC(=O)NCCSC(=O)/C=C/c1ccc(O)cc1	C00223	R01616
M00350	3	1	CC(C)(COP(=O)(O)OP(=O)(O)OC[C@H]1O[C@@H](n2cnc3c(N)ncnc32)[C@H](O)[C@@H]1OP(=O)(O)O)[C@@H](O)C(=O)NCCC(=O)NCCSC(=O)/C=C/c1ccc(O)c(O)c1	C00323	COc1cc(/C=C/C(=O)SCCNC(=O)CCNC(=O)[C@H](O)C(C)(C)COP(=O)(O)OP(=O)(O)OC[C@H]2O[C@@H](n3cnc4c(N)ncnc43)[C@H](O)[C@@H]2OP(=O)(O)O)ccc1O	C00406	R01942
M00350	3	2	COc1cc(/C=C/C(=O)SCCNC(=O)CCNC(=O)[C@H](O)C(C)(C)COP(=O)(O)OP(=O)(O)OC[C@H]2O[C@@H](n3cnc4c(N)ncnc43)[C@H](O)[C@@H]2OP(=O)(O)O)ccc1O	C00406	COc1cc(C(O)CC(=O)SCCNC(=O)CCNC(=O)[C@H](O)C(C)(C)COP(=O)(O)OP(=O)(O)OC[C@H]2O[C@@H](n3cnc4c(N)ncnc43)[C@H](O)[C@@H]2OP(=O)(O)O)ccc1O	C07303	R05772
M00350	3	3	COc1cc(C(O)CC(=O)SCCNC(=O)CCNC(=O)[C@H](O)C(C)(C)COP(=O)(O)OP(=O)(O)OC[C@H]2O[C@@H](n3cnc4c(N)ncnc43)[C@H](O)[C@@H]2OP(=O)(O)O)ccc1O	C07303	COc1cc(C=O)ccc1O	C00755	R05773
M00350	3	4	COc1cc(C=O)ccc1O	C00755	COc1cc(CN)ccc1O	C16666	R08461
M00356	1	1	CO	C00132	CSCCS(=O)(=O)O	C03920	R09098
M00356	1	2	CSCCS(=O)(=O)O	C03920	C[C@@H](OP(=O)(O)O)[C@H](NC(=O)CCCCCCSSCCS(=O)(=O)O)C(=O)O	C04832	R04541
M00356	1	3	C[C@@H](OP(=O)(O)O)[C@H](NC(=O)CCCCCCSSCCS(=O)(=O)O)C(=O)O	C04832	C[C@@H](OP(=O)(O)O)[C@H](NC(=O)CCCCCCS)C(=O)O	C04628	R04540;R11928;R11931;R11943;R11944
M00357	1	1	CC(=O)O	C00033	CC(=O)OP(=O)(O)O	C00227	R00315
M00357	1	2	CC(=O)OP(=O)(O)O	C00227	CC(=O)SCCNC(=O)CCNC(=O)[C@H](O)C(C)(C)COP(=O)(O)OP(=O)(O)OC[C@H]1O[C@@H](n2cnc3c(N)ncnc32)[C@H](O)[C@@H]1OP(=O)(O)O	C00024	R00230
M00357	1	3	CC(=O)SCCNC(=O)CCNC(=O)[C@H](O)C(C)(C)COP(=O)(O)OP(=O)(O)OC[C@H]1O[C@@H](n2cnc3c(N)ncnc32)[C@H](O)[C@@H]1OP(=O)(O)O	C00024	C[C@@H]1Nc2nc(N)[nH]c(=O)c2N(C)[C@H]1[C@@H](C)Nc1ccc(C[C@H](O)[C@H](O)[C@H](O)CO[C@H]2O[C@H](COP(=O)(O)O[C@@H](CCC(=O)O)C(=O)O)[C@@H](O)[C@H]2O)cc1	C04488	R09096
M00357	1	4	C[C@@H]1Nc2nc(N)[nH]c(=O)c2N(C)[C@H]1[C@@H](C)Nc1ccc(C[C@H](O)[C@H](O)[C@H](O)CO[C@H]2O[C@H](COP(=O)(O)O[C@@H](CCC(=O)O)C(=O)O)[C@@H](O)[C@H]2O)cc1	C04488	CSCCS(=O)(=O)O	C03920	R04347
M00357	1	5	CSCCS(=O)(=O)O	C03920	C[C@@H](OP(=O)(O)O)[C@H](NC(=O)CCCCCCSSCCS(=O)(=O)O)C(=O)O	C04832	R04541
M00357	2	1	CC(=O)OP(=O)(O)O	C00227	CC(=O)SCCNC(=O)CCNC(=O)[C@H](O)C(C)(C)COP(=O)(O)OP(=O)(O)OC[C@H]1O[C@@H](n2cnc3c(N)ncnc32)[C@H](O)[C@@H]1OP(=O)(O)O	C00024	R00230
M00357	2	2	CC(=O)SCCNC(=O)CCNC(=O)[C@H](O)C(C)(C)COP(=O)(O)OP(=O)(O)OC[C@H]1O[C@@H](n2cnc3c(N)ncnc32)[C@H](O)[C@@H]1OP(=O)(O)O	C00024	C[C@@H]1Nc2nc(N)[nH]c(=O)c2N(C)[C@H]1[C@@H](C)Nc1ccc(C[C@H](O)[C@H](O)[C@H](O)CO[C@H]2O[C@H](COP(=O)(O)O[C@@H](CCC(=O)O)C(=O)O)[C@@H](O)[C@H]2O)cc1	C04488	R09096
M00357	2	3	C[C@@H]1Nc2nc(N)[nH]c(=O)c2N(C)[C@H]1[C@@H](C)Nc1ccc(C[C@H](O)[C@H](O)[C@H](O)CO[C@H]2O[C@H](COP(=O)(O)O[C@@H](CCC(=O)O)C(=O)O)[C@@H](O)[C@H]2O)cc1	C04488	CSCCS(=O)(=O)O	C03920	R04347
M00357	2	4	CSCCS(=O)(=O)O	C03920	C[C@@H](OP(=O)(O)O)[C@H](NC(=O)CCCCCCSSCCS(=O)(=O)O)C(=O)O	C04832	R04541
M00357	2	5	C[C@@H](OP(=O)(O)O)[C@H](NC(=O)CCCCCCSSCCS(=O)(=O)O)C(=O)O	C04832	C[C@@H](OP(=O)(O)O)[C@H](NC(=O)CCCCCCS)C(=O)O	C04628	R04540;R11928;R11931;R11943;R11944
M00358	1	1	C=C(OP(=O)(O)O)C(=O)O	C00074	O=C(O)[C@H](CS(=O)(=O)O)OP(=O)(O)O	C11536	R07476
M00358	1	2	O=C(O)[C@H](CS(=O)(=O)O)OP(=O)(O)O	C11536	O=C(O)[C@@H](O)CS(=O)(=O)O	C11537	R05789
M00358	1	3	O=C(O)[C@@H](O)CS(=O)(=O)O	C11537	O=C(O)C(=O)CS(=O)(=O)O	C05528	R07136;R07137
M00358	1	4	O=C(O)C(=O)CS(=O)(=O)O	C05528	O=CCS(=O)(=O)O	C00593	R05774
M00364	1	1	C=C(C)CCOP(=O)(O)OP(=O)(O)O	C00129	CC(C)=CCOP(=O)(O)OP(=O)(O)O	C00235	R01123
M00364	1	2	CC(C)=CCOP(=O)(O)OP(=O)(O)O	C00235	CC(C)=CCC/C(C)=C/COP(=O)(O)OP(=O)(O)O	C00341	R01658
M00365	1	1	C=C(C)CCOP(=O)(O)OP(=O)(O)O	C00129	CC(C)=CCOP(=O)(O)OP(=O)(O)O	C00235	R01123
M00365	1	2	CC(C)=CCOP(=O)(O)OP(=O)(O)O	C00235	CC(C)=CCC/C(C)=C/COP(=O)(O)OP(=O)(O)O	C00341	R01658
M00366	1	1	C=C(C)CCOP(=O)(O)OP(=O)(O)O	C00129	CC(C)=CCOP(=O)(O)OP(=O)(O)O	C00235	R01123
M00366	1	2	CC(C)=CCOP(=O)(O)OP(=O)(O)O	C00235	CC(C)=CCC/C(C)=C/COP(=O)(O)OP(=O)(O)O	C00341	R01658
M00367	1	1	C=C(C)CCOP(=O)(O)OP(=O)(O)O	C00129	CC(C)=CCOP(=O)(O)OP(=O)(O)O	C00235	R01123
M00367	1	2	CC(C)=CCOP(=O)(O)OP(=O)(O)O	C00235	CC(C)=CCC/C(C)=C/COP(=O)(O)OP(=O)(O)O	C00341	R01658
M00368	1	1	CSCC[C@H](N)C(=O)O	C00073	C[S+](CC[C@H](N)C(=O)[O-])C[C@H]1O[C@@H](n2cnc3c(N)ncnc32)[C@H](O)[C@@H]1O	C00019	R00177
M00368	1	2	C[S+](CC[C@H](N)C(=O)[O-])C[C@H]1O[C@@H](n2cnc3c(N)ncnc32)[C@H](O)[C@@H]1O	C00019	NC1(C(=O)O)CC1	C01234	R00179
M00368	1	3	NC1(C(=O)O)CC1	C01234	C=C	C06547	R07214
M00369	1	1	N[C@@H](Cc1ccc(O)cc1)C(=O)O	C00082	O=C(O)[C@H](Cc1ccc(O)cc1)NO	C03004	R00730
M00369	1	2	O=C(O)[C@H](Cc1ccc(O)cc1)NO	C03004	O=C(O)[C@H](Cc1ccc(O)cc1)N(O)O	C15503	R04460
M00369	1	3	O=C(O)[C@H](Cc1ccc(O)cc1)N(O)O	C15503	O/N=C/Cc1ccc(O)cc1	C04350	R07190
M00369	1	4	O/N=C/Cc1ccc(O)cc1	C04350	N#C[C@@H](O)c1ccc(O)cc1	C03742	R05728
M00369	1	5	N#C[C@@H](O)c1ccc(O)cc1	C03742	N#C[C@@H](O[C@@H]1O[C@H](CO)[C@@H](O)[C@H](O)[C@H]1O)c1ccc(O)cc1	C05143	R04296
M00370	1	1	N[C@@H](Cc1c[nH]c2ccccc12)C(=O)O	C00078	O/N=C/Cc1c[nH]c2ccccc12	C02937	R08160
M00370	1	2	O/N=C/Cc1c[nH]c2ccccc12	C02937	N[C@@H](CS/C(Cc1c[nH]c2ccccc12)=N\O)C(=O)O	C16518	R08168
M00371	1	1	CC(C)[C@H](C)CC[C@@H](C)[C@H]1CC[C@H]2[C@@H]3CC=C4C[C@@H](O)CC[C@]4(C)[C@H]3CC[C@@]21C	C01789	CC(C)[C@H](C)C[C@H](O)[C@@H](C)[C@H]1CC[C@H]2[C@@H]3CC=C4C[C@@H](O)CC[C@]4(C)[C@H]3CC[C@@]21C	C15795	R07445
M00371	1	2	CC(C)[C@H](C)C[C@H](O)[C@@H](C)[C@H]1CC[C@H]2[C@@H]3CC=C4C[C@@H](O)CC[C@]4(C)[C@H]3CC[C@@]21C	C15795	CC(C)[C@H](C)C[C@H](O)[C@@H](C)[C@H]1CC[C@H]2[C@@H]3CCC4=CC(=O)CC[C@]4(C)[C@H]3CC[C@@]21C	C15796	R07446
M00371	1	3	CC(C)[C@H](C)C[C@H](O)[C@@H](C)[C@H]1CC[C@H]2[C@@H]3CCC4=CC(=O)CC[C@]4(C)[C@H]3CC[C@@]21C	C15796	CC(C)[C@H](C)C[C@H](O)[C@@H](C)[C@H]1CC[C@H]2[C@@H]3CC[C@H]4CC(=O)CC[C@]4(C)[C@H]3CC[C@@]21C	C15797	R07447
M00371	1	4	CC(C)[C@H](C)C[C@H](O)[C@@H](C)[C@H]1CC[C@H]2[C@@H]3CC[C@H]4CC(=O)CC[C@]4(C)[C@H]3CC[C@@]21C	C15797	CC(C)[C@H](C)[C@@H](O)[C@H](O)[C@@H](C)[C@H]1CC[C@H]2[C@@H]3CC[C@H]4CC(=O)CC[C@]4(C)[C@H]3CC[C@@]21C	C15800	R07791
M00371	1	5	CC(C)[C@H](C)[C@@H](O)[C@H](O)[C@@H](C)[C@H]1CC[C@H]2[C@@H]3CC[C@H]4CC(=O)CC[C@]4(C)[C@H]3CC[C@@]21C	C15800	CC(C)[C@H](C)[C@@H](O)[C@H](O)[C@@H](C)[C@H]1CC[C@H]2[C@@H]3CC[C@H]4C[C@H](O)CC[C@]4(C)[C@H]3CC[C@@]21C	C15801	R07473
M00371	2	1	CC(C)[C@H](C)C[C@H](O)[C@@H](C)[C@H]1CC[C@H]2[C@@H]3CC[C@H]4CC(=O)CC[C@]4(C)[C@H]3CC[C@@]21C	C15797	CC(C)[C@H](C)[C@@H](O)[C@H](O)[C@@H](C)[C@H]1CC[C@H]2[C@@H]3CC[C@H]4CC(=O)CC[C@]4(C)[C@H]3CC[C@@]21C	C15800	R07791
M00371	2	2	CC(C)[C@H](C)[C@@H](O)[C@H](O)[C@@H](C)[C@H]1CC[C@H]2[C@@H]3CC[C@H]4CC(=O)CC[C@]4(C)[C@H]3CC[C@@]21C	C15800	CC(C)[C@H](C)[C@@H](O)[C@H](O)[C@@H](C)[C@H]1CC[C@H]2[C@@H]3CC[C@H]4C[C@H](O)CC[C@]4(C)[C@H]3CC[C@@]21C	C15801	R07473
M00371	2	3	CC(C)[C@H](C)[C@@H](O)[C@H](O)[C@@H](C)[C@H]1CC[C@H]2[C@@H]3CC[C@H]4C[C@H](O)CC[C@]4(C)[C@H]3CC[C@@]21C	C15801	CC(C)[C@H](C)[C@@H](O)[C@H](O)[C@@H](C)[C@H]1CC[C@H]2[C@@H]3CC[C@H]4C[C@H](O)[C@H](O)C[C@]4(C)[C@H]3CC[C@@]21C	C15802	R07474
M00371	2	4	CC(C)[C@H](C)[C@@H](O)[C@H](O)[C@@H](C)[C@H]1CC[C@H]2[C@@H]3CC[C@H]4C[C@H](O)[C@H](O)C[C@]4(C)[C@H]3CC[C@@]21C	C15802	CC(C)[C@H](C)[C@@H](O)[C@H](O)[C@@H](C)[C@H]1CCC2[C@@H]3C[C@H](O)[C@H]4C[C@H](O)[C@H](O)C[C@]4(C)[C@H]3CC[C@@]21C	C15803	R07450
M00371	2	5	CC(C)[C@H](C)[C@@H](O)[C@H](O)[C@@H](C)[C@H]1CCC2[C@@H]3C[C@H](O)[C@H]4C[C@H](O)[C@H](O)C[C@]4(C)[C@H]3CC[C@@]21C	C15803	CC(C)[C@H](C)[C@@H](O)[C@H](O)[C@@H](C)[C@H]1CC[C@H]2[C@@H]3CC(=O)[C@H]4C[C@H](O)[C@H](O)C[C@]4(C)[C@H]3CC[C@@]21C	C15794	R07451
M00372	1	1	CC1=C(/C=C/C(C)=C/C=C/C(C)=C/C=C/C=C(C)/C=C/C=C(C)/C=C/C2=C(C)CCCC2(C)C)C(C)(C)CCC1	C02094	CC1=C(/C=C/C(C)=C/C=C/C(C)=C/C=C/C=C(C)/C=C/C=C(C)/C=C/C2=C(C)C[C@@H](O)CC2(C)C)C(C)(C)CCC1	C08591	R07558
M00372	1	2	CC1=C(/C=C/C(C)=C/C=C/C(C)=C/C=C/C=C(C)/C=C/C=C(C)/C=C/C2=C(C)C[C@@H](O)CC2(C)C)C(C)(C)CCC1	C08591	CC1=C(/C=C/C(C)=C/C=C/C(C)=C/C=C/C=C(C)/C=C/C=C(C)/C=C/C2=C(C)C[C@@H](O)CC2(C)C)C(C)(C)C[C@H](O)C1	C06098	R07559
M00372	1	3	CC1=C(/C=C/C(C)=C/C=C/C(C)=C/C=C/C=C(C)/C=C/C=C(C)/C=C/C2=C(C)C[C@@H](O)CC2(C)C)C(C)(C)C[C@H](O)C1	C06098	CC1=C(/C=C/C(C)=C/C=C/C(C)=C/C=C/C=C(C)/C=C/C=C(C)/C=C/[C@@]23O[C@]2(C)C[C@@H](O)CC3(C)C)C(C)(C)C[C@H](O)C1	C08579	R06946
M00372	1	4	CC1=C(/C=C/C(C)=C/C=C/C(C)=C/C=C/C=C(C)/C=C/C=C(C)/C=C/[C@@]23O[C@]2(C)C[C@@H](O)CC3(C)C)C(C)(C)C[C@H](O)C1	C08579	CC(/C=C/C=C(C)/C=C/[C@@]12O[C@]1(C)C[C@@H](O)CC2(C)C)=C\C=C\C=C(C)\C=C\C=C(C)\C=C\[C@@]12O[C@]1(C)C[C@@H](O)CC2(C)C	C08614	R06947
M00372	2	1	CC(=C/C=O)/C=C/[C@@]12O[C@]1(C)C[C@@H](O)CC2(C)C	C13453	CC1=CC(=O)CC(C)(C)[C@@]1(O)/C=C/C(C)=C\C=O	C13455	R06954
M00372	2	2	CC1=CC(=O)CC(C)(C)[C@@]1(O)/C=C/C(C)=C\C=O	C13455	CC1=CC(=O)CC(C)(C)[C@@]1(O)/C=C/C(C)=C\C(=O)O	C06082	R06957
M00373	1	1	CC(=O)SCCNC(=O)CCNC(=O)[C@H](O)C(C)(C)COP(=O)(O)OP(=O)(O)OC[C@H]1O[C@@H](n2cnc3c(N)ncnc32)[C@H](O)[C@@H]1OP(=O)(O)O	C00024	CC(=O)CC(=O)SCCNC(=O)CCNC(=O)[C@H](O)C(C)(C)COP(=O)(O)OP(=O)(O)OC[C@H]1O[C@@H](n2cnc3c(N)ncnc32)[C@H](O)[C@@H]1OP(=O)(O)O	C00332	R00238
M00373	1	2	CC(=O)CC(=O)SCCNC(=O)CCNC(=O)[C@H](O)C(C)(C)COP(=O)(O)OP(=O)(O)OC[C@H]1O[C@@H](n2cnc3c(N)ncnc32)[C@H](O)[C@@H]1OP(=O)(O)O	C00332	C[C@@H](O)CC(=O)SCCNC(=O)CCNC(=O)[C@H](O)C(C)(C)COP(=O)(O)OP(=O)(O)OC[C@H]1O[C@@H](n2cnc3c(N)ncnc32)[C@H](O)[C@@H]1OP(=O)(O)O	C03561	R01977
M00373	1	3	C[C@@H](O)CC(=O)SCCNC(=O)CCNC(=O)[C@H](O)C(C)(C)COP(=O)(O)OP(=O)(O)OC[C@H]1O[C@@H](n2cnc3c(N)ncnc32)[C@H](O)[C@@H]1OP(=O)(O)O	C03561	C/C=C/C(=O)SCCNC(=O)CCNC(=O)[C@H](O)C(C)(C)COP(=O)(O)OP(=O)(O)OC[C@H]1O[C@@H](n2cnc3c(N)ncnc32)[C@H](O)[C@@H]1OP(=O)(O)O	C00877	R03027
M00373	1	4	C/C=C/C(=O)SCCNC(=O)CCNC(=O)[C@H](O)C(C)(C)COP(=O)(O)OP(=O)(O)OC[C@H]1O[C@@H](n2cnc3c(N)ncnc32)[C@H](O)[C@@H]1OP(=O)(O)O	C00877	CC[C@@H](C(=O)O)C(=O)SCCNC(=O)CCNC(=O)[C@H](O)C(C)(C)COP(=O)(O)OP(=O)(O)OC[C@H]1O[C@@H](n2cnc3c(N)ncnc32)[C@H](O)[C@@H]1OP(=O)(O)O	C18026	R09291
M00373	1	5	CC[C@@H](C(=O)O)C(=O)SCCNC(=O)CCNC(=O)[C@H](O)C(C)(C)COP(=O)(O)OP(=O)(O)OC[C@H]1O[C@@H](n2cnc3c(N)ncnc32)[C@H](O)[C@@H]1OP(=O)(O)O	C18026	CC[C@H](C(=O)O)C(=O)SCCNC(=O)CCNC(=O)[C@H](O)C(C)(C)COP(=O)(O)OP(=O)(O)OC[C@H]1O[C@@H](n2cnc3c(N)ncnc32)[C@H](O)[C@@H]1OP(=O)(O)O	C20238	R09979
M00373	2	1	C[C@@H](CC(=O)O)C(=O)SCCNC(=O)CCNC(=O)[C@H](O)C(C)(C)COP(=O)(O)OP(=O)(O)OC[C@H]1O[C@@H](n2cnc3c(N)ncnc32)[C@H](O)[C@@H]1OP(=O)(O)O	C18324	C/C(=C\C(=O)O)C(=O)SCCNC(=O)CCNC(=O)[C@H](O)C(C)(C)COP(=O)(O)OP(=O)(O)OC[C@H]1O[C@@H](n2cnc3c(N)ncnc32)[C@H](O)[C@@H]1OP(=O)(O)O	C06028	R09293
M00373	2	2	C/C(=C\C(=O)O)C(=O)SCCNC(=O)CCNC(=O)[C@H](O)C(C)(C)COP(=O)(O)OP(=O)(O)OC[C@H]1O[C@@H](n2cnc3c(N)ncnc32)[C@H](O)[C@@H]1OP(=O)(O)O	C06028	C[C@@H](C(=O)SCCNC(=O)CCNC(=O)[C@H](O)C(C)(C)COP(=O)(O)OP(=O)(O)OC[C@H]1O[C@@H](n2cnc3c(N)ncnc32)[C@H](O)[C@@H]1OP(=O)(O)O)[C@H](O)C(=O)O	C06027	R05076
M00373	2	3	C[C@@H](C(=O)SCCNC(=O)CCNC(=O)[C@H](O)C(C)(C)COP(=O)(O)OP(=O)(O)OC[C@H]1O[C@@H](n2cnc3c(N)ncnc32)[C@H](O)[C@@H]1OP(=O)(O)O)[C@H](O)C(=O)O	C06027	CCC(=O)SCCNC(=O)CCNC(=O)[C@H](O)C(C)(C)COP(=O)(O)OP(=O)(O)OC[C@H]1O[C@@H](n2cnc3c(N)ncnc32)[C@H](O)[C@@H]1OP(=O)(O)O	C00100	R00934
M00373	2	4	CCC(=O)SCCNC(=O)CCNC(=O)[C@H](O)C(C)(C)COP(=O)(O)OP(=O)(O)OC[C@H]1O[C@@H](n2cnc3c(N)ncnc32)[C@H](O)[C@@H]1OP(=O)(O)O	C00100	C[C@@H](C(=O)O)C(=O)SCCNC(=O)CCNC(=O)[C@H](O)C(C)(C)COP(=O)(O)OP(=O)(O)OC[C@H]1O[C@@H](n2cnc3c(N)ncnc32)[C@H](O)[C@@H]1OP(=O)(O)O	C00683	R01859
M00373	2	5	C[C@@H](C(=O)O)C(=O)SCCNC(=O)CCNC(=O)[C@H](O)C(C)(C)COP(=O)(O)OP(=O)(O)OC[C@H]1O[C@@H](n2cnc3c(N)ncnc32)[C@H](O)[C@@H]1OP(=O)(O)O	C00683	C[C@H](C(=O)O)C(=O)SCCNC(=O)CCNC(=O)[C@H](O)C(C)(C)COP(=O)(O)OP(=O)(O)OC[C@H]1O[C@@H](n2cnc3c(N)ncnc32)[C@H](O)[C@@H]1OP(=O)(O)O	C01213	R02765
M00373	3	1	C/C(=C\C(=O)O)C(=O)SCCNC(=O)CCNC(=O)[C@H](O)C(C)(C)COP(=O)(O)OP(=O)(O)OC[C@H]1O[C@@H](n2cnc3c(N)ncnc32)[C@H](O)[C@@H]1OP(=O)(O)O	C06028	C[C@@H](C(=O)SCCNC(=O)CCNC(=O)[C@H](O)C(C)(C)COP(=O)(O)OP(=O)(O)OC[C@H]1O[C@@H](n2cnc3c(N)ncnc32)[C@H](O)[C@@H]1OP(=O)(O)O)[C@H](O)C(=O)O	C06027	R05076
M00373	3	2	C[C@@H](C(=O)SCCNC(=O)CCNC(=O)[C@H](O)C(C)(C)COP(=O)(O)OP(=O)(O)OC[C@H]1O[C@@H](n2cnc3c(N)ncnc32)[C@H](O)[C@@H]1OP(=O)(O)O)[C@H](O)C(=O)O	C06027	CCC(=O)SCCNC(=O)CCNC(=O)[C@H](O)C(C)(C)COP(=O)(O)OP(=O)(O)OC[C@H]1O[C@@H](n2cnc3c(N)ncnc32)[C@H](O)[C@@H]1OP(=O)(O)O	C00100	R00934
M00373	3	3	CCC(=O)SCCNC(=O)CCNC(=O)[C@H](O)C(C)(C)COP(=O)(O)OP(=O)(O)OC[C@H]1O[C@@H](n2cnc3c(N)ncnc32)[C@H](O)[C@@H]1OP(=O)(O)O	C00100	C[C@@H](C(=O)O)C(=O)SCCNC(=O)CCNC(=O)[C@H](O)C(C)(C)COP(=O)(O)OP(=O)(O)OC[C@H]1O[C@@H](n2cnc3c(N)ncnc32)[C@H](O)[C@@H]1OP(=O)(O)O	C00683	R01859
M00373	3	4	C[C@@H](C(=O)O)C(=O)SCCNC(=O)CCNC(=O)[C@H](O)C(C)(C)COP(=O)(O)OP(=O)(O)OC[C@H]1O[C@@H](n2cnc3c(N)ncnc32)[C@H](O)[C@@H]1OP(=O)(O)O	C00683	C[C@H](C(=O)O)C(=O)SCCNC(=O)CCNC(=O)[C@H](O)C(C)(C)COP(=O)(O)OP(=O)(O)OC[C@H]1O[C@@H](n2cnc3c(N)ncnc32)[C@H](O)[C@@H]1OP(=O)(O)O	C01213	R02765
M00373	3	5	C[C@H](C(=O)O)C(=O)SCCNC(=O)CCNC(=O)[C@H](O)C(C)(C)COP(=O)(O)OP(=O)(O)OC[C@H]1O[C@@H](n2cnc3c(N)ncnc32)[C@H](O)[C@@H]1OP(=O)(O)O	C01213	CC(C)(COP(=O)(O)OP(=O)(O)OC[C@H]1O[C@@H](n2cnc3c(N)ncnc32)[C@H](O)[C@@H]1OP(=O)(O)O)[C@@H](O)C(=O)NCCC(=O)NCCSC(=O)CCC(=O)O	C00091	R00833
M00374	1	1	CC(=O)SCCNC(=O)CCNC(=O)[C@H](O)C(C)(C)COP(=O)(O)OP(=O)(O)OC[C@H]1O[C@@H](n2cnc3c(N)ncnc32)[C@H](O)[C@@H]1OP(=O)(O)O	C00024	CC(=O)C(=O)O	C00022	R01196
M00374	1	2	CC(=O)C(=O)O	C00022	C=C(OP(=O)(O)O)C(=O)O	C00074	R00199
M00374	1	3	C=C(OP(=O)(O)O)C(=O)O	C00074	O=C(O)CC(=O)C(=O)O	C00036	R00345
M00374	1	4	O=C(O)CC(=O)C(=O)O	C00036	O=C(O)C[C@H](O)C(=O)O	C00149	R00342
M00374	1	5	O=C(O)C[C@H](O)C(=O)O	C00149	O=C(O)/C=C/C(=O)O	C00122	R01082
M00374	2	1	O=C(O)CCC(=O)O	C00042	CC(C)(COP(=O)(O)OP(=O)(O)OC[C@H]1O[C@@H](n2cnc3c(N)ncnc32)[C@H](O)[C@@H]1OP(=O)(O)O)[C@@H](O)C(=O)NCCC(=O)NCCSC(=O)CCC(=O)O	C00091	R00405
M00374	2	2	CC(C)(COP(=O)(O)OP(=O)(O)OC[C@H]1O[C@@H](n2cnc3c(N)ncnc32)[C@H](O)[C@@H]1OP(=O)(O)O)[C@@H](O)C(=O)NCCC(=O)NCCSC(=O)CCC(=O)O	C00091	O=CCCC(=O)O	C00232	R09280
M00374	2	3	O=CCCC(=O)O	C00232	O=C(O)CCCO	C00989	R09281
M00374	2	4	O=C(O)CCCO	C00989	CC(C)(COP(=O)(O)OP(=O)(O)OC[C@H]1O[C@@H](n2cnc3c(N)ncnc32)[C@H](O)[C@@H]1OP(=O)(O)O)[C@@H](O)C(=O)NCCC(=O)NCCSC(=O)CCCO	C11062	R09279
M00374	2	5	CC(C)(COP(=O)(O)OP(=O)(O)OC[C@H]1O[C@@H](n2cnc3c(N)ncnc32)[C@H](O)[C@@H]1OP(=O)(O)O)[C@@H](O)C(=O)NCCC(=O)NCCSC(=O)CCCO	C11062	C/C=C/C(=O)SCCNC(=O)CCNC(=O)[C@H](O)C(C)(C)COP(=O)(O)OP(=O)(O)OC[C@H]1O[C@@H](n2cnc3c(N)ncnc32)[C@H](O)[C@@H]1OP(=O)(O)O	C00877	R10782
M00374	3	1	O=C(O)CCCO	C00989	CC(C)(COP(=O)(O)OP(=O)(O)OC[C@H]1O[C@@H](n2cnc3c(N)ncnc32)[C@H](O)[C@@H]1OP(=O)(O)O)[C@@H](O)C(=O)NCCC(=O)NCCSC(=O)CCCO	C11062	R09279
M00374	3	2	CC(C)(COP(=O)(O)OP(=O)(O)OC[C@H]1O[C@@H](n2cnc3c(N)ncnc32)[C@H](O)[C@@H]1OP(=O)(O)O)[C@@H](O)C(=O)NCCC(=O)NCCSC(=O)CCCO	C11062	C/C=C/C(=O)SCCNC(=O)CCNC(=O)[C@H](O)C(C)(C)COP(=O)(O)OP(=O)(O)OC[C@H]1O[C@@H](n2cnc3c(N)ncnc32)[C@H](O)[C@@H]1OP(=O)(O)O	C00877	R10782
M00374	3	3	C/C=C/C(=O)SCCNC(=O)CCNC(=O)[C@H](O)C(C)(C)COP(=O)(O)OP(=O)(O)OC[C@H]1O[C@@H](n2cnc3c(N)ncnc32)[C@H](O)[C@@H]1OP(=O)(O)O	C00877	C[C@H](O)CC(=O)SCCNC(=O)CCNC(=O)[C@H](O)C(C)(C)COP(=O)(O)OP(=O)(O)OC[C@H]1O[C@@H](n2cnc3c(N)ncnc32)[C@H](O)[C@@H]1OP(=O)(O)O	C01144	R03026
M00374	3	4	C[C@H](O)CC(=O)SCCNC(=O)CCNC(=O)[C@H](O)C(C)(C)COP(=O)(O)OP(=O)(O)OC[C@H]1O[C@@H](n2cnc3c(N)ncnc32)[C@H](O)[C@@H]1OP(=O)(O)O	C01144	CC(=O)CC(=O)SCCNC(=O)CCNC(=O)[C@H](O)C(C)(C)COP(=O)(O)OP(=O)(O)OC[C@H]1O[C@@H](n2cnc3c(N)ncnc32)[C@H](O)[C@@H]1OP(=O)(O)O	C00332	R01975
M00374	3	5	CC(=O)CC(=O)SCCNC(=O)CCNC(=O)[C@H](O)C(C)(C)COP(=O)(O)OP(=O)(O)OC[C@H]1O[C@@H](n2cnc3c(N)ncnc32)[C@H](O)[C@@H]1OP(=O)(O)O	C00332	CC(=O)SCCNC(=O)CCNC(=O)[C@H](O)C(C)(C)COP(=O)(O)OP(=O)(O)OC[C@H]1O[C@@H](n2cnc3c(N)ncnc32)[C@H](O)[C@@H]1OP(=O)(O)O	C00024	R00238
M00375	1	1	CC(=O)SCCNC(=O)CCNC(=O)[C@H](O)C(C)(C)COP(=O)(O)OP(=O)(O)OC[C@H]1O[C@@H](n2cnc3c(N)ncnc32)[C@H](O)[C@@H]1OP(=O)(O)O	C00024	CC(C)(COP(=O)(O)OP(=O)(O)OC[C@H]1O[C@@H](n2cnc3c(N)ncnc32)[C@H](O)[C@@H]1OP(=O)(O)O)[C@@H](O)C(=O)NCCC(=O)NCCSC(=O)CC(=O)O	C00083	R00742
M00375	1	2	CC(C)(COP(=O)(O)OP(=O)(O)OC[C@H]1O[C@@H](n2cnc3c(N)ncnc32)[C@H](O)[C@@H]1OP(=O)(O)O)[C@@H](O)C(=O)NCCC(=O)NCCSC(=O)CC(=O)O	C00083	O=CCC(=O)O	C00222	R00740
M00375	1	3	O=CCC(=O)O	C00222	O=C(O)CCO	C01013	R09289
M00375	1	4	O=C(O)CCO	C01013	CC(C)(COP(=O)(O)OP(=O)(O)OC[C@H]1O[C@@H](n2cnc3c(N)ncnc32)[C@H](O)[C@@H]1OP(=O)(O)O)[C@@H](O)C(=O)NCCC(=O)NCCSC(=O)CCO	C05668	R09286
M00375	1	5	CC(C)(COP(=O)(O)OP(=O)(O)OC[C@H]1O[C@@H](n2cnc3c(N)ncnc32)[C@H](O)[C@@H]1OP(=O)(O)O)[C@@H](O)C(=O)NCCC(=O)NCCSC(=O)CCO	C05668	C=CC(=O)SCCNC(=O)CCNC(=O)[C@H](O)C(C)(C)COP(=O)(O)OP(=O)(O)OC[C@H]1O[C@@H](n2cnc3c(N)ncnc32)[C@H](O)[C@@H]1OP(=O)(O)O	C00894	R03045
M00375	2	1	CCC(=O)SCCNC(=O)CCNC(=O)[C@H](O)C(C)(C)COP(=O)(O)OP(=O)(O)OC[C@H]1O[C@@H](n2cnc3c(N)ncnc32)[C@H](O)[C@@H]1OP(=O)(O)O	C00100	C[C@@H](C(=O)O)C(=O)SCCNC(=O)CCNC(=O)[C@H](O)C(C)(C)COP(=O)(O)OP(=O)(O)OC[C@H]1O[C@@H](n2cnc3c(N)ncnc32)[C@H](O)[C@@H]1OP(=O)(O)O	C00683	R01859
M00375	2	2	C[C@@H](C(=O)O)C(=O)SCCNC(=O)CCNC(=O)[C@H](O)C(C)(C)COP(=O)(O)OP(=O)(O)OC[C@H]1O[C@@H](n2cnc3c(N)ncnc32)[C@H](O)[C@@H]1OP(=O)(O)O	C00683	C[C@H](C(=O)O)C(=O)SCCNC(=O)CCNC(=O)[C@H](O)C(C)(C)COP(=O)(O)OP(=O)(O)OC[C@H]1O[C@@H](n2cnc3c(N)ncnc32)[C@H](O)[C@@H]1OP(=O)(O)O	C01213	R02765
M00375	2	3	C[C@H](C(=O)O)C(=O)SCCNC(=O)CCNC(=O)[C@H](O)C(C)(C)COP(=O)(O)OP(=O)(O)OC[C@H]1O[C@@H](n2cnc3c(N)ncnc32)[C@H](O)[C@@H]1OP(=O)(O)O	C01213	CC(C)(COP(=O)(O)OP(=O)(O)OC[C@H]1O[C@@H](n2cnc3c(N)ncnc32)[C@H](O)[C@@H]1OP(=O)(O)O)[C@@H](O)C(=O)NCCC(=O)NCCSC(=O)CCC(=O)O	C00091	R00833
M00375	2	4	CC(C)(COP(=O)(O)OP(=O)(O)OC[C@H]1O[C@@H](n2cnc3c(N)ncnc32)[C@H](O)[C@@H]1OP(=O)(O)O)[C@@H](O)C(=O)NCCC(=O)NCCSC(=O)CCC(=O)O	C00091	O=CCCC(=O)O	C00232	R09280
M00375	2	5	O=CCCC(=O)O	C00232	O=C(O)CCCO	C00989	R09281
M00375	3	1	O=C(O)CCCO	C00989	CC(C)(COP(=O)(O)OP(=O)(O)OC[C@H]1O[C@@H](n2cnc3c(N)ncnc32)[C@H](O)[C@@H]1OP(=O)(O)O)[C@@H](O)C(=O)NCCC(=O)NCCSC(=O)CCCO	C11062	R09279
M00375	3	2	CC(C)(COP(=O)(O)OP(=O)(O)OC[C@H]1O[C@@H](n2cnc3c(N)ncnc32)[C@H](O)[C@@H]1OP(=O)(O)O)[C@@H](O)C(=O)NCCC(=O)NCCSC(=O)CCCO	C11062	C/C=C/C(=O)SCCNC(=O)CCNC(=O)[C@H](O)C(C)(C)COP(=O)(O)OP(=O)(O)OC[C@H]1O[C@@H](n2cnc3c(N)ncnc32)[C@H](O)[C@@H]1OP(=O)(O)O	C00877	R10782
M00375	3	3	C/C=C/C(=O)SCCNC(=O)CCNC(=O)[C@H](O)C(C)(C)COP(=O)(O)OP(=O)(O)OC[C@H]1O[C@@H](n2cnc3c(N)ncnc32)[C@H](O)[C@@H]1OP(=O)(O)O	C00877	C[C@H](O)CC(=O)SCCNC(=O)CCNC(=O)[C@H](O)C(C)(C)COP(=O)(O)OP(=O)(O)OC[C@H]1O[C@@H](n2cnc3c(N)ncnc32)[C@H](O)[C@@H]1OP(=O)(O)O	C01144	R03026
M00375	3	4	C[C@H](O)CC(=O)SCCNC(=O)CCNC(=O)[C@H](O)C(C)(C)COP(=O)(O)OP(=O)(O)OC[C@H]1O[C@@H](n2cnc3c(N)ncnc32)[C@H](O)[C@@H]1OP(=O)(O)O	C01144	CC(=O)CC(=O)SCCNC(=O)CCNC(=O)[C@H](O)C(C)(C)COP(=O)(O)OP(=O)(O)OC[C@H]1O[C@@H](n2cnc3c(N)ncnc32)[C@H](O)[C@@H]1OP(=O)(O)O	C00332	R01975
M00375	3	5	CC(=O)CC(=O)SCCNC(=O)CCNC(=O)[C@H](O)C(C)(C)COP(=O)(O)OP(=O)(O)OC[C@H]1O[C@@H](n2cnc3c(N)ncnc32)[C@H](O)[C@@H]1OP(=O)(O)O	C00332	CC(=O)SCCNC(=O)CCNC(=O)[C@H](O)C(C)(C)COP(=O)(O)OP(=O)(O)OC[C@H]1O[C@@H](n2cnc3c(N)ncnc32)[C@H](O)[C@@H]1OP(=O)(O)O	C00024	R00238
M00376	1	1	CC(=O)SCCNC(=O)CCNC(=O)[C@H](O)C(C)(C)COP(=O)(O)OP(=O)(O)OC[C@H]1O[C@@H](n2cnc3c(N)ncnc32)[C@H](O)[C@@H]1OP(=O)(O)O	C00024	CC(C)(COP(=O)(O)OP(=O)(O)OC[C@H]1O[C@@H](n2cnc3c(N)ncnc32)[C@H](O)[C@@H]1OP(=O)(O)O)[C@@H](O)C(=O)NCCC(=O)NCCSC(=O)CC(=O)O	C00083	R00742
M00376	1	2	CC(C)(COP(=O)(O)OP(=O)(O)OC[C@H]1O[C@@H](n2cnc3c(N)ncnc32)[C@H](O)[C@@H]1OP(=O)(O)O)[C@@H](O)C(=O)NCCC(=O)NCCSC(=O)CC(=O)O	C00083	O=CCC(=O)O	C00222	R00740
M00376	1	3	O=CCC(=O)O	C00222	O=C(O)CCO	C01013	R09289
M00376	1	4	O=C(O)CCO	C01013	CC(C)(COP(=O)(O)OP(=O)(O)OC[C@H]1O[C@@H](n2cnc3c(N)ncnc32)[C@H](O)[C@@H]1OP(=O)(O)O)[C@@H](O)C(=O)NCCC(=O)NCCSC(=O)CCO	C05668	R09286
M00376	1	5	CC(C)(COP(=O)(O)OP(=O)(O)OC[C@H]1O[C@@H](n2cnc3c(N)ncnc32)[C@H](O)[C@@H]1OP(=O)(O)O)[C@@H](O)C(=O)NCCC(=O)NCCSC(=O)CCO	C05668	C=CC(=O)SCCNC(=O)CCNC(=O)[C@H](O)C(C)(C)COP(=O)(O)OP(=O)(O)OC[C@H]1O[C@@H](n2cnc3c(N)ncnc32)[C@H](O)[C@@H]1OP(=O)(O)O	C00894	R03045
M00376	2	1	O=C(O)CCO	C01013	CC(C)(COP(=O)(O)OP(=O)(O)OC[C@H]1O[C@@H](n2cnc3c(N)ncnc32)[C@H](O)[C@@H]1OP(=O)(O)O)[C@@H](O)C(=O)NCCC(=O)NCCSC(=O)CCO	C05668	R09286
M00376	2	2	CC(C)(COP(=O)(O)OP(=O)(O)OC[C@H]1O[C@@H](n2cnc3c(N)ncnc32)[C@H](O)[C@@H]1OP(=O)(O)O)[C@@H](O)C(=O)NCCC(=O)NCCSC(=O)CCO	C05668	C=CC(=O)SCCNC(=O)CCNC(=O)[C@H](O)C(C)(C)COP(=O)(O)OP(=O)(O)OC[C@H]1O[C@@H](n2cnc3c(N)ncnc32)[C@H](O)[C@@H]1OP(=O)(O)O	C00894	R03045
M00376	2	3	C=CC(=O)SCCNC(=O)CCNC(=O)[C@H](O)C(C)(C)COP(=O)(O)OP(=O)(O)OC[C@H]1O[C@@H](n2cnc3c(N)ncnc32)[C@H](O)[C@@H]1OP(=O)(O)O	C00894	CCC(=O)SCCNC(=O)CCNC(=O)[C@H](O)C(C)(C)COP(=O)(O)OP(=O)(O)OC[C@H]1O[C@@H](n2cnc3c(N)ncnc32)[C@H](O)[C@@H]1OP(=O)(O)O	C00100	R00919
M00376	2	4	CCC(=O)SCCNC(=O)CCNC(=O)[C@H](O)C(C)(C)COP(=O)(O)OP(=O)(O)OC[C@H]1O[C@@H](n2cnc3c(N)ncnc32)[C@H](O)[C@@H]1OP(=O)(O)O	C00100	C[C@@H](C(=O)SCCNC(=O)CCNC(=O)[C@H](O)C(C)(C)COP(=O)(O)OP(=O)(O)OC[C@H]1O[C@@H](n2cnc3c(N)ncnc32)[C@H](O)[C@@H]1OP(=O)(O)O)[C@H](O)C(=O)O	C06027	R00934
M00376	2	5	C[C@@H](C(=O)SCCNC(=O)CCNC(=O)[C@H](O)C(C)(C)COP(=O)(O)OP(=O)(O)OC[C@H]1O[C@@H](n2cnc3c(N)ncnc32)[C@H](O)[C@@H]1OP(=O)(O)O)[C@H](O)C(=O)O	C06027	C/C(=C\C(=O)O)C(=O)SCCNC(=O)CCNC(=O)[C@H](O)C(C)(C)COP(=O)(O)OP(=O)(O)OC[C@H]1O[C@@H](n2cnc3c(N)ncnc32)[C@H](O)[C@@H]1OP(=O)(O)O	C06028	R05076
M00376	3	1	C/C(=C\C(=O)SCCNC(=O)CCNC(=O)[C@H](O)C(C)(C)COP(=O)(O)OP(=O)(O)OC[C@H]1O[C@@H](n2cnc3c(N)ncnc32)[C@H](O)[C@@H]1OP(=O)(O)O)C(=O)O	C18323	CC(C)(COP(=O)(O)OP(=O)(O)OC[C@H]1O[C@@H](n2cnc3c(N)ncnc32)[C@H](O)[C@@H]1OP(=O)(O)O)[C@@H](O)C(=O)NCCC(=O)NCCSC(=O)C[C@](C)(O)C(=O)O	C01011	R09282
M00376	3	2	CC(C)(COP(=O)(O)OP(=O)(O)OC[C@H]1O[C@@H](n2cnc3c(N)ncnc32)[C@H](O)[C@@H]1OP(=O)(O)O)[C@@H](O)C(=O)NCCC(=O)NCCSC(=O)C[C@](C)(O)C(=O)O	C01011	CC(=O)SCCNC(=O)CCNC(=O)[C@H](O)C(C)(C)COP(=O)(O)OP(=O)(O)OC[C@H]1O[C@@H](n2cnc3c(N)ncnc32)[C@H](O)[C@@H]1OP(=O)(O)O	C00024	R00237
M00377	1	1	O=C=O	C00011	O=CO	C00058	R00134
M00377	1	2	O=CO	C00058	Nc1nc2c(c(=O)[nH]1)N[C@@H](CN(C=O)c1ccc(C(=O)N[C@@H](CCC(=O)O)C(=O)O)cc1)CN2	C00234	R00943
M00377	1	3	Nc1nc2c(c(=O)[nH]1)N[C@@H](CN(C=O)c1ccc(C(=O)N[C@@H](CCC(=O)O)C(=O)O)cc1)CN2	C00234	Nc1nc2c(c(=O)[nH]1)[N+]1=CN(c3ccc(C(=O)N[C@@H](CCC(=O)O)C(=O)O)cc3)C[C@H]1CN2	C00445	R01655
M00377	1	4	Nc1nc2c(c(=O)[nH]1)[N+]1=CN(c3ccc(C(=O)N[C@@H](CCC(=O)O)C(=O)O)cc3)C[C@H]1CN2	C00445	Nc1nc2c(c(=O)[nH]1)N1CN(c3ccc(C(=O)N[C@@H](CCC(=O)O)C(=O)O)cc3)C[C@H]1CN2	C00143	R01220
M00377	1	5	Nc1nc2c(c(=O)[nH]1)N1CN(c3ccc(C(=O)N[C@@H](CCC(=O)O)C(=O)O)cc3)C[C@H]1CN2	C00143	CN1c2c(nc(N)[nH]c2=O)NC[C@@H]1CNc1ccc(C(=O)N[C@@H](CCC(=O)O)C(=O)O)cc1	C00440	R07168
M00377	2	1	O=CO	C00058	Nc1nc2c(c(=O)[nH]1)N[C@@H](CN(C=O)c1ccc(C(=O)N[C@@H](CCC(=O)O)C(=O)O)cc1)CN2	C00234	R00943
M00377	2	2	Nc1nc2c(c(=O)[nH]1)N[C@@H](CN(C=O)c1ccc(C(=O)N[C@@H](CCC(=O)O)C(=O)O)cc1)CN2	C00234	Nc1nc2c(c(=O)[nH]1)[N+]1=CN(c3ccc(C(=O)N[C@@H](CCC(=O)O)C(=O)O)cc3)C[C@H]1CN2	C00445	R01655
M00377	2	3	Nc1nc2c(c(=O)[nH]1)[N+]1=CN(c3ccc(C(=O)N[C@@H](CCC(=O)O)C(=O)O)cc3)C[C@H]1CN2	C00445	Nc1nc2c(c(=O)[nH]1)N1CN(c3ccc(C(=O)N[C@@H](CCC(=O)O)C(=O)O)cc3)C[C@H]1CN2	C00143	R01220
M00377	2	4	Nc1nc2c(c(=O)[nH]1)N1CN(c3ccc(C(=O)N[C@@H](CCC(=O)O)C(=O)O)cc3)C[C@H]1CN2	C00143	CN1c2c(nc(N)[nH]c2=O)NC[C@@H]1CNc1ccc(C(=O)N[C@@H](CCC(=O)O)C(=O)O)cc1	C00440	R07168
M00377	2	5	CN1c2c(nc(N)[nH]c2=O)NC[C@@H]1CNc1ccc(C(=O)N[C@@H](CCC(=O)O)C(=O)O)cc1	C00440	CC(=O)SCCNC(=O)CCNC(=O)[C@H](O)C(C)(C)COP(=O)(O)OP(=O)(O)OC[C@H]1O[C@@H](n2cnc3c(N)ncnc32)[C@H](O)[C@@H]1OP(=O)(O)O	C00024	R02289;R08433;R10243
M00378	1	1	O=C(O)C(=O)Cc1ccc(O)cc1	C01179	O=c1nc2n(C[C@H](O)[C@H](O)[C@H](O)CO)c3cc(O)ccc3cc-2c(=O)[nH]1	C19154	R09396
M00378	1	2	O=c1nc2n(C[C@H](O)[C@H](O)[C@H](O)CO)c3cc(O)ccc3cc-2c(=O)[nH]1	C19154	C[C@H](OP(=O)(O)OC[C@@H](O)[C@@H](O)[C@@H](O)Cn1c2nc(=O)[nH]c(=O)c-2cc2ccc(O)cc21)C(=O)O	C19153	R09398
M00378	1	3	C[C@H](OP(=O)(O)OC[C@@H](O)[C@@H](O)[C@@H](O)Cn1c2nc(=O)[nH]c(=O)c-2cc2ccc(O)cc21)C(=O)O	C19153	C[C@H](OP(=O)(O)OC[C@@H](O)[C@@H](O)[C@@H](O)Cn1c2nc(=O)[nH]c(=O)c-2cc2ccc(O)cc21)C(=O)N[C@@H](CCC(=O)O)C(=O)O	C19152	R09399
M00418	1	1	Cc1ccccc1	C01455	O=C(O)C[C@@H](Cc1ccccc1)C(=O)O	C09816	R05598
M00418	1	2	O=C(O)C[C@@H](Cc1ccccc1)C(=O)O	C09816	CC(C)(COP(=O)(O)OP(=O)(O)OC[C@H]1O[C@@H](n2cnc3c(N)ncnc32)[C@H](O)[C@@H]1OP(=O)(O)O)[C@@H](O)C(=O)NCCC(=O)NCCSC(=O)[C@@H](CC(=O)O)Cc1ccccc1	C09817	R05588
M00418	1	3	CC(C)(COP(=O)(O)OP(=O)(O)OC[C@H]1O[C@@H](n2cnc3c(N)ncnc32)[C@H](O)[C@@H]1OP(=O)(O)O)[C@@H](O)C(=O)NCCC(=O)NCCSC(=O)[C@@H](CC(=O)O)Cc1ccccc1	C09817	CC(C)(COP(=O)(O)OP(=O)(O)OC[C@H]1O[C@@H](n2cnc3c(N)ncnc32)[C@H](O)[C@@H]1OP(=O)(O)O)[C@@H](O)C(=O)NCCC(=O)NCCSC(=O)/C(=C/c1ccccc1)CC(=O)O	C09818	R05584
M00418	1	4	CC(C)(COP(=O)(O)OP(=O)(O)OC[C@H]1O[C@@H](n2cnc3c(N)ncnc32)[C@H](O)[C@@H]1OP(=O)(O)O)[C@@H](O)C(=O)NCCC(=O)NCCSC(=O)/C(=C/c1ccccc1)CC(=O)O	C09818	CC(C)(COP(=O)(O)OP(=O)(O)OC[C@H]1O[C@@H](n2cnc3c(N)ncnc32)[C@H](O)[C@@H]1OP(=O)(O)O)[C@@H](O)C(=O)NCCC(=O)NCCSC(=O)[C@H](CC(=O)O)[C@@H](O)c1ccccc1	C09819	R05599
M00418	1	5	CC(C)(COP(=O)(O)OP(=O)(O)OC[C@H]1O[C@@H](n2cnc3c(N)ncnc32)[C@H](O)[C@@H]1OP(=O)(O)O)[C@@H](O)C(=O)NCCC(=O)NCCSC(=O)[C@H](CC(=O)O)[C@@H](O)c1ccccc1	C09819	CC(C)(COP(=O)(O)OP(=O)(O)OC[C@H]1O[C@@H](n2cnc3c(N)ncnc32)[C@H](O)[C@@H]1OP(=O)(O)O)[C@@H](O)C(=O)NCCC(=O)NCCSC(=O)[C@H](CC(=O)O)C(=O)c1ccccc1	C09820	R05575
M00418	2	1	O=C(O)C[C@@H](Cc1ccccc1)C(=O)O	C09816	CC(C)(COP(=O)(O)OP(=O)(O)OC[C@H]1O[C@@H](n2cnc3c(N)ncnc32)[C@H](O)[C@@H]1OP(=O)(O)O)[C@@H](O)C(=O)NCCC(=O)NCCSC(=O)[C@@H](CC(=O)O)Cc1ccccc1	C09817	R05588
M00418	2	2	CC(C)(COP(=O)(O)OP(=O)(O)OC[C@H]1O[C@@H](n2cnc3c(N)ncnc32)[C@H](O)[C@@H]1OP(=O)(O)O)[C@@H](O)C(=O)NCCC(=O)NCCSC(=O)[C@@H](CC(=O)O)Cc1ccccc1	C09817	CC(C)(COP(=O)(O)OP(=O)(O)OC[C@H]1O[C@@H](n2cnc3c(N)ncnc32)[C@H](O)[C@@H]1OP(=O)(O)O)[C@@H](O)C(=O)NCCC(=O)NCCSC(=O)/C(=C/c1ccccc1)CC(=O)O	C09818	R05584
M00418	2	3	CC(C)(COP(=O)(O)OP(=O)(O)OC[C@H]1O[C@@H](n2cnc3c(N)ncnc32)[C@H](O)[C@@H]1OP(=O)(O)O)[C@@H](O)C(=O)NCCC(=O)NCCSC(=O)/C(=C/c1ccccc1)CC(=O)O	C09818	CC(C)(COP(=O)(O)OP(=O)(O)OC[C@H]1O[C@@H](n2cnc3c(N)ncnc32)[C@H](O)[C@@H]1OP(=O)(O)O)[C@@H](O)C(=O)NCCC(=O)NCCSC(=O)[C@H](CC(=O)O)[C@@H](O)c1ccccc1	C09819	R05599
M00418	2	4	CC(C)(COP(=O)(O)OP(=O)(O)OC[C@H]1O[C@@H](n2cnc3c(N)ncnc32)[C@H](O)[C@@H]1OP(=O)(O)O)[C@@H](O)C(=O)NCCC(=O)NCCSC(=O)[C@H](CC(=O)O)[C@@H](O)c1ccccc1	C09819	CC(C)(COP(=O)(O)OP(=O)(O)OC[C@H]1O[C@@H](n2cnc3c(N)ncnc32)[C@H](O)[C@@H]1OP(=O)(O)O)[C@@H](O)C(=O)NCCC(=O)NCCSC(=O)[C@H](CC(=O)O)C(=O)c1ccccc1	C09820	R05575
M00418	2	5	CC(C)(COP(=O)(O)OP(=O)(O)OC[C@H]1O[C@@H](n2cnc3c(N)ncnc32)[C@H](O)[C@@H]1OP(=O)(O)O)[C@@H](O)C(=O)NCCC(=O)NCCSC(=O)[C@H](CC(=O)O)C(=O)c1ccccc1	C09820	CC(C)(COP(=O)(O)OP(=O)(O)OC[C@H]1O[C@@H](n2cnc3c(N)ncnc32)[C@H](O)[C@@H]1OP(=O)(O)O)[C@@H](O)C(=O)NCCC(=O)NCCSC(=O)c1ccccc1	C00512	R05587
M00419	1	1	Cc1ccc(C(C)C)cc1	C06575	CC(C)c1ccc(CO)cc1	C06576	R05266
M00419	1	2	CC(C)c1ccc(CO)cc1	C06576	CC(C)c1ccc(C=O)cc1	C06577	R05232
M00419	1	3	CC(C)c1ccc(C=O)cc1	C06577	CC(C)c1ccc(C(=O)O)cc1	C06578	R05235
M00422	1	1	O=C=O	C00011	[C-]#[O+]	C00237	R07157
M00422	1	2	[C-]#[O+]	C00237	CC(=O)SCCNC(=O)CCNC(=O)[C@H](O)C(C)(C)COP(=O)(O)OP(=O)(O)OC[C@H]1O[C@@H](n2cnc3c(N)ncnc32)[C@H](O)[C@@H]1OP(=O)(O)O	C00024	R09096;R10219
M00432	1	1	CC(=O)SCCNC(=O)CCNC(=O)[C@H](O)C(C)(C)COP(=O)(O)OP(=O)(O)OC[C@H]1O[C@@H](n2cnc3c(N)ncnc32)[C@H](O)[C@@H]1OP(=O)(O)O	C00024	CC(C)[C@@](O)(CC(=O)O)C(=O)O	C02504	R01213
M00432	1	2	CC(C)[C@@](O)(CC(=O)O)C(=O)O	C02504	CC(C)[C@H](C(=O)O)[C@@H](O)C(=O)O	C04411	R03968;R04001
M00432	1	3	CC(C)[C@H](C(=O)O)[C@@H](O)C(=O)O	C04411	CC(C)CC(=O)C(=O)O	C00233	R01652;R04426
M00433	1	1	CC(=O)SCCNC(=O)CCNC(=O)[C@H](O)C(C)(C)COP(=O)(O)OP(=O)(O)OC[C@H]1O[C@@H](n2cnc3c(N)ncnc32)[C@H](O)[C@@H]1OP(=O)(O)O	C00024	O=C(O)CC[C@@](O)(CC(=O)O)C(=O)O	C01251	R00271
M00433	1	2	O=C(O)CC[C@@](O)(CC(=O)O)C(=O)O	C01251	O=C(O)/C=C(/CCC(=O)O)C(=O)O	C04002	R03444
M00433	1	3	O=C(O)/C=C(/CCC(=O)O)C(=O)O	C04002	O=C(O)CC[C@H](C(=O)O)[C@@H](O)C(=O)O	C05662	R04371
M00433	1	4	O=C(O)CC[C@H](C(=O)O)[C@@H](O)C(=O)O	C05662	O=C(O)CCCC(=O)C(=O)O	C00322	R01934
M00525	1	1	N[C@@H](CC(=O)O)C(=O)O	C00049	N[C@@H](CC(=O)OP(=O)(O)O)C(=O)O	C03082	R00480
M00525	1	2	N[C@@H](CC(=O)OP(=O)(O)O)C(=O)O	C03082	N[C@@H](CC=O)C(=O)O	C00441	R02291
M00525	1	3	N[C@@H](CC=O)C(=O)O	C00441	O=C(O)C1=N[C@H](C(=O)O)C[C@H](O)C1	C20258	R10147
M00525	1	4	O=C(O)C1=N[C@H](C(=O)O)C[C@H](O)C1	C20258	O=C(O)C1=N[C@H](C(=O)O)CCC1	C03972	R04198;R04199
M00525	1	5	O=C(O)C1=N[C@H](C(=O)O)CCC1	C03972	CC(=O)N[C@@H](CCCC(=O)C(=O)O)C(=O)O	C05539	R04364
M00525	2	1	O=C(O)C1=N[C@H](C(=O)O)CCC1	C03972	CC(=O)N[C@@H](CCCC(=O)C(=O)O)C(=O)O	C05539	R04364
M00525	2	2	CC(=O)N[C@@H](CCCC(=O)C(=O)O)C(=O)O	C05539	CC(=O)N[C@@H](CCC[C@H](N)C(=O)O)C(=O)O	C04390	R04467
M00525	2	3	CC(=O)N[C@@H](CCC[C@H](N)C(=O)O)C(=O)O	C04390	N[C@@H](CCC[C@H](N)C(=O)O)C(=O)O	C00666	R02733
M00525	2	4	N[C@@H](CCC[C@H](N)C(=O)O)C(=O)O	C00666	N[C@@H](CCC[C@@H](N)C(=O)O)C(=O)O	C00680	R02735
M00525	2	5	N[C@@H](CCC[C@@H](N)C(=O)O)C(=O)O	C00680	NCCCC[C@H](N)C(=O)O	C00047	R00451
M00526	1	1	N[C@@H](CC(=O)O)C(=O)O	C00049	N[C@@H](CC(=O)OP(=O)(O)O)C(=O)O	C03082	R00480
M00526	1	2	N[C@@H](CC(=O)OP(=O)(O)O)C(=O)O	C03082	N[C@@H](CC=O)C(=O)O	C00441	R02291
M00526	1	3	N[C@@H](CC=O)C(=O)O	C00441	O=C(O)C1=N[C@H](C(=O)O)C[C@H](O)C1	C20258	R10147
M00526	1	4	O=C(O)C1=N[C@H](C(=O)O)C[C@H](O)C1	C20258	O=C(O)C1=N[C@H](C(=O)O)CCC1	C03972	R04198;R04199
M00526	1	5	O=C(O)C1=N[C@H](C(=O)O)CCC1	C03972	N[C@@H](CCCC(=O)C(=O)O)C(=O)O	C03871	R04336
M00526	2	1	N[C@@H](CC=O)C(=O)O	C00441	O=C(O)C1=N[C@H](C(=O)O)C[C@H](O)C1	C20258	R10147
M00526	2	2	O=C(O)C1=N[C@H](C(=O)O)C[C@H](O)C1	C20258	O=C(O)C1=N[C@H](C(=O)O)CCC1	C03972	R04198;R04199
M00526	2	3	O=C(O)C1=N[C@H](C(=O)O)CCC1	C03972	N[C@@H](CCCC(=O)C(=O)O)C(=O)O	C03871	R04336
M00526	2	4	N[C@@H](CCCC(=O)C(=O)O)C(=O)O	C03871	N[C@@H](CCC[C@@H](N)C(=O)O)C(=O)O	C00680	R02755
M00526	2	5	N[C@@H](CCC[C@@H](N)C(=O)O)C(=O)O	C00680	NCCCC[C@H](N)C(=O)O	C00047	R00451
M00527	1	1	N[C@@H](CC(=O)O)C(=O)O	C00049	N[C@@H](CC(=O)OP(=O)(O)O)C(=O)O	C03082	R00480
M00527	1	2	N[C@@H](CC(=O)OP(=O)(O)O)C(=O)O	C03082	N[C@@H](CC=O)C(=O)O	C00441	R02291
M00527	1	3	N[C@@H](CC=O)C(=O)O	C00441	O=C(O)C1=N[C@H](C(=O)O)C[C@H](O)C1	C20258	R10147
M00527	1	4	O=C(O)C1=N[C@H](C(=O)O)C[C@H](O)C1	C20258	O=C(O)C1=N[C@H](C(=O)O)CCC1	C03972	R04198;R04199
M00527	1	5	O=C(O)C1=N[C@H](C(=O)O)CCC1	C03972	N[C@@H](CCC[C@H](N)C(=O)O)C(=O)O	C00666	R07613
M00527	2	1	N[C@@H](CC=O)C(=O)O	C00441	O=C(O)C1=N[C@H](C(=O)O)C[C@H](O)C1	C20258	R10147
M00527	2	2	O=C(O)C1=N[C@H](C(=O)O)C[C@H](O)C1	C20258	O=C(O)C1=N[C@H](C(=O)O)CCC1	C03972	R04198;R04199
M00527	2	3	O=C(O)C1=N[C@H](C(=O)O)CCC1	C03972	N[C@@H](CCC[C@H](N)C(=O)O)C(=O)O	C00666	R07613
M00527	2	4	N[C@@H](CCC[C@H](N)C(=O)O)C(=O)O	C00666	N[C@@H](CCC[C@@H](N)C(=O)O)C(=O)O	C00680	R02735
M00527	2	5	N[C@@H](CCC[C@@H](N)C(=O)O)C(=O)O	C00680	NCCCC[C@H](N)C(=O)O	C00047	R00451
M00529	1	1	O=[N+]([O-])O	C00244	O=NO	C00088	R00798
M00530	1	1	O=[N+]([O-])O	C00244	O=NO	C00088	R00798
M00530	1	2	O=NO	C00088	N	C00014	R00787;R00789;R05712
M00531	1	1	O=[N+]([O-])O	C00244	O=NO	C00088	R00791;R00794;R00796;R00798
M00531	1	2	O=NO	C00088	N	C00014	R00790
M00532	1	1	O=C(COP(=O)(O)O)[C@H](O)[C@H](O)COP(=O)(O)O	C01182	O=C(O)COP(=O)(O)O	C00988	R03140
M00532	1	2	O=C(O)COP(=O)(O)O	C00988	O=C(O)CO	C00160	R01334
M00532	1	3	O=C(O)CO	C00160	O=CC(=O)O	C00048	R00475
M00532	1	4	O=CC(=O)O	C00048	NCC(=O)O	C00037	R00372
M00532	1	5	NCC(=O)O	C00037	N[C@@H](CO)C(=O)O	C00065	R00945
M00532	2	1	O=C(O)CO	C00160	O=CC(=O)O	C00048	R00475
M00532	2	2	O=CC(=O)O	C00048	NCC(=O)O	C00037	R00372
M00532	2	3	NCC(=O)O	C00037	N[C@@H](CO)C(=O)O	C00065	R00945
M00532	2	4	N[C@@H](CO)C(=O)O	C00065	NCC(=O)O	C00037	R00588
M00532	2	5	NCC(=O)O	C00037	N	C00014	R01221
M00533	1	1	O=C(O)Cc1ccc(O)c(O)c1	C01161	O=C/C(=C\C=C(\O)C(=O)O)CC(=O)O	C04642	R03303
M00533	1	2	O=C/C(=C\C=C(\O)C(=O)O)CC(=O)O	C04642	O=C(O)C/C(=C/C=C(/O)C(=O)O)C(=O)O	C04186	R04418
M00533	1	3	O=C(O)C/C(=C/C=C(/O)C(=O)O)C(=O)O	C04186	O=C(O)C[C@H](/C=C/C(=O)C(=O)O)C(=O)O	C04052	R04379
M00533	1	4	O=C(O)C[C@H](/C=C/C(=O)C(=O)O)C(=O)O	C04052	O=C(O)C/C=C/C=C(\O)C(=O)O	C05600	R04380
M00533	1	5	O=C(O)C/C=C/C=C(\O)C(=O)O	C05600	O=C(O)CC/C=C\C(=O)C(=O)O	C03063	R04134
M00534	1	1	c1ccc2ccccc2c1	C00829	O[C@H]1C=Cc2ccccc2[C@H]1O	C04314	R02968
M00534	1	2	O[C@H]1C=Cc2ccccc2[C@H]1O	C04314	Oc1ccc2ccccc2c1O	C03012	R04115
M00534	1	3	Oc1ccc2ccccc2c1O	C03012	O=C(O)C1(O)C=Cc2ccccc2O1	C06204	R04117
M00534	1	4	O=C(O)C1(O)C=Cc2ccccc2O1	C06204	O=C(O)C(=O)/C=C/c1ccccc1O	C06203	R05137
M00534	1	5	O=C(O)C(=O)/C=C/c1ccccc1O	C06203	O=Cc1ccccc1O	C06202	R05136
M00534	2	1	O[C@H]1C=Cc2ccccc2[C@H]1O	C04314	Oc1ccc2ccccc2c1O	C03012	R04115
M00534	2	2	Oc1ccc2ccccc2c1O	C03012	O=C(O)C1(O)C=Cc2ccccc2O1	C06204	R04117
M00534	2	3	O=C(O)C1(O)C=Cc2ccccc2O1	C06204	O=C(O)C(=O)/C=C/c1ccccc1O	C06203	R05137
M00534	2	4	O=C(O)C(=O)/C=C/c1ccccc1O	C06203	O=Cc1ccccc1O	C06202	R05136
M00534	2	5	O=Cc1ccccc1O	C06202	O=C(O)c1ccccc1O	C00805	R02941
M00535	1	1	CC(=O)C(=O)O	C00022	C[C@@](O)(CC(=O)O)C(=O)O	C02612	R07399
M00535	1	2	C[C@@](O)(CC(=O)O)C(=O)O	C02612	C/C(=C/C(=O)O)C(=O)O	C02226	R03896
M00535	1	3	C/C(=C/C(=O)O)C(=O)O	C02226	C[C@H](C(=O)O)[C@@H](O)C(=O)O	C06032	R03898
M00535	1	4	C[C@H](C(=O)O)[C@@H](O)C(=O)O	C06032	CCC(=O)C(=O)O	C00109	R00994
M00538	1	1	Cc1ccccc1	C01455	OCc1ccccc1	C00556	R02550
M00538	1	2	OCc1ccccc1	C00556	O=Cc1ccccc1	C00261	R01763
M00538	1	3	O=Cc1ccccc1	C00261	O=C(O)c1ccccc1	C00180	R01419
M00539	1	1	CC(C)c1ccc(C(=O)O)cc1	C06578	CC(C)C1=CC=C(C(=O)O)[C@@H](O)[C@H]1O	C06579	R05247
M00539	1	2	CC(C)C1=CC=C(C(=O)O)[C@@H](O)[C@H]1O	C06579	CC(C)c1ccc(C(=O)O)c(O)c1O	C06580	R05240
M00539	1	3	CC(C)c1ccc(C(=O)O)c(O)c1O	C06580	CC(C)C(=O)/C=C\C(C(=O)O)=C(\O)C(=O)O	C06581	R05248
M00539	1	4	CC(C)C(=O)/C=C\C(C(=O)O)=C(\O)C(=O)O	C06581	CC(C)C(=O)/C=C\C=C(\O)C(=O)O	C06582	R05377
M00540	1	1	O=C(O)C1CCCCC1	C09822	CC(C)(COP(=O)(O)OP(=O)(O)OC[C@H]1O[C@@H](n2cnc3c(N)ncnc32)[C@H](O)[C@@H]1OP(=O)(O)O)[C@@H](O)C(=O)NCCC(=O)NCCSC(=O)C1CCCCC1	C09823	R05620
M00540	1	2	CC(C)(COP(=O)(O)OP(=O)(O)OC[C@H]1O[C@@H](n2cnc3c(N)ncnc32)[C@H](O)[C@@H]1OP(=O)(O)O)[C@@H](O)C(=O)NCCC(=O)NCCSC(=O)C1CCCCC1	C09823	CC(C)(COP(=O)(O)OP(=O)(O)OC[C@H]1O[C@@H](n2cnc3c(N)ncnc32)[C@H](O)[C@@H]1OP(=O)(O)O)[C@@H](O)C(=O)NCCC(=O)NCCSC(=O)C1=CCCCC1	C09811	R05619
M00540	1	3	CC(C)(COP(=O)(O)OP(=O)(O)OC[C@H]1O[C@@H](n2cnc3c(N)ncnc32)[C@H](O)[C@@H]1OP(=O)(O)O)[C@@H](O)C(=O)NCCC(=O)NCCSC(=O)C1=CCCCC1	C09811	CC(C)(COP(=O)(O)OP(=O)(O)OC[C@H]1O[C@@H](n2cnc3c(N)ncnc32)[C@H](O)[C@@H]1OP(=O)(O)O)[C@@H](O)C(=O)NCCC(=O)NCCSC(=O)C1CCCCC1O	C09812	R05600
M00540	1	4	CC(C)(COP(=O)(O)OP(=O)(O)OC[C@H]1O[C@@H](n2cnc3c(N)ncnc32)[C@H](O)[C@@H]1OP(=O)(O)O)[C@@H](O)C(=O)NCCC(=O)NCCSC(=O)C1CCCCC1O	C09812	CC(C)(COP(=O)(O)OP(=O)(O)OC[C@H]1O[C@@H](n2cnc3c(N)ncnc32)[C@H](O)[C@@H]1OP(=O)(O)O)[C@@H](O)C(=O)NCCC(=O)NCCSC(=O)C1CCCCC1=O	C09813	R05582
M00540	1	5	CC(C)(COP(=O)(O)OP(=O)(O)OC[C@H]1O[C@@H](n2cnc3c(N)ncnc32)[C@H](O)[C@@H]1OP(=O)(O)O)[C@@H](O)C(=O)NCCC(=O)NCCSC(=O)C1CCCCC1=O	C09813	CC(C)(COP(=O)(O)OP(=O)(O)OC[C@H]1O[C@@H](n2cnc3c(N)ncnc32)[C@H](O)[C@@H]1OP(=O)(O)O)[C@@H](O)C(=O)NCCC(=O)NCCSC(=O)CCCCCC(=O)O	C01063	R05592
M00541	1	1	CC(C)(COP(=O)(O)OP(=O)(O)OC[C@H]1O[C@@H](n2cnc3c(N)ncnc32)[C@H](O)[C@@H]1OP(=O)(O)O)[C@@H](O)C(=O)NCCC(=O)NCCSC(=O)c1ccccc1	C00512	CC(C)(COP(=O)(O)OP(=O)(O)OC[C@H]1O[C@@H](n2cnc3c(N)ncnc32)[C@H](O)[C@@H]1OP(=O)(O)O)[C@@H](O)C(=O)NCCC(=O)NCCSC(=O)C1=CCCC=C1	C06322	R02451;R10961
M00541	1	2	CC(C)(COP(=O)(O)OP(=O)(O)OC[C@H]1O[C@@H](n2cnc3c(N)ncnc32)[C@H](O)[C@@H]1OP(=O)(O)O)[C@@H](O)C(=O)NCCC(=O)NCCSC(=O)C1=CCCC=C1	C06322	CC(C)(COP(=O)(O)OP(=O)(O)OC[C@H]1O[C@@H](n2cnc3c(N)ncnc32)[C@H](O)[C@@H]1OP(=O)(O)O)[C@@H](O)C(=O)NCCC(=O)NCCSC(=O)C1=CCCCC1O	C06749	R05597
M00541	1	3	CC(C)(COP(=O)(O)OP(=O)(O)OC[C@H]1O[C@@H](n2cnc3c(N)ncnc32)[C@H](O)[C@@H]1OP(=O)(O)O)[C@@H](O)C(=O)NCCC(=O)NCCSC(=O)C1=CCCCC1O	C06749	CC(C)(COP(=O)(O)OP(=O)(O)OC[C@H]1O[C@@H](n2cnc3c(N)ncnc32)[C@H](O)[C@@H]1OP(=O)(O)O)[C@@H](O)C(=O)NCCC(=O)NCCSC(=O)C1=CCCCC1=O	C09821	R05581
M00541	1	4	CC(C)(COP(=O)(O)OP(=O)(O)OC[C@H]1O[C@@H](n2cnc3c(N)ncnc32)[C@H](O)[C@@H]1OP(=O)(O)O)[C@@H](O)C(=O)NCCC(=O)NCCSC(=O)C1=CCCCC1=O	C09821	CC(C)(COP(=O)(O)OP(=O)(O)OC[C@H]1O[C@@H](n2cnc3c(N)ncnc32)[C@H](O)[C@@H]1OP(=O)(O)O)[C@@H](O)C(=O)NCCC(=O)NCCSC(=O)CC(O)CCCC(=O)O	C06714	R05594
M00544	1	1	c1ccc2c(c1)[nH]c1ccccc12	C08060	Nc1ccccc1-c1cccc(O)c1O	C08061	R05414;R09512
M00544	1	2	Nc1ccccc1-c1cccc(O)c1O	C08061	Nc1ccccc1C(=O)/C=C\C=C(\O)C(=O)O	C08062	R05415
M00545	1	1	O=C(O)/C=C/c1ccccc1	C00423	O=C(O)/C=C/C1=CC=C[C@H](O)[C@@H]1O	C12622	R06783
M00545	1	2	O=C(O)/C=C/C1=CC=C[C@H](O)[C@@H]1O	C12622	O=C(O)/C=C/c1cccc(O)c1O	C12623	R06785
M00545	1	3	O=C(O)/C=C/c1cccc(O)c1O	C12623	O=C(O)/C=C/C(=O)/C=C\C=C(\O)C(=O)O	C12624	R06788
M00545	2	1	C=C/C=C(/O)C(=O)O	C00596	CC(O)CC(=O)C(=O)O	C03589	R02601
M00545	2	2	CC(O)CC(=O)C(=O)O	C03589	CC=O	C00084	R00750
M00545	2	3	CC=O	C00084	CC(=O)SCCNC(=O)CCNC(=O)[C@H](O)C(C)(C)COP(=O)(O)OP(=O)(O)OC[C@H]1O[C@@H](n2cnc3c(N)ncnc32)[C@H](O)[C@@H]1OP(=O)(O)O	C00024	R00228
M00546	1	1	O=c1[nH]c(=O)c2[nH]cnc2[nH]1	C00385	O=c1[nH]c(=O)c2[nH]c(=O)[nH]c2[nH]1	C00366	R02103;R02107
M00546	1	2	O=c1[nH]c(=O)c2[nH]c(=O)[nH]c2[nH]1	C00366	O=C1N=C2N=C(O)NC2(O)C(=O)N1	C11821	R02106;R09514
M00546	1	3	O=C1N=C2N=C(O)NC2(O)C(=O)N1	C11821	NC(=O)NC1=NC(=O)NC1(O)C(=O)O	C12248	R06601
M00546	1	4	NC(=O)NC1=NC(=O)NC1(O)C(=O)O	C12248	NC(=O)N[C@H]1NC(=O)NC1=O	C02350	R06604
M00546	1	5	NC(=O)N[C@H]1NC(=O)NC1=O	C02350	NC(=O)NC(NC(N)=O)C(=O)O	C00499	R02425
M00546	2	1	O=c1[nH]c(=O)c2[nH]c(=O)[nH]c2[nH]1	C00366	O=C1N=C2N=C(O)NC2(O)C(=O)N1	C11821	R02106;R09514
M00546	2	2	O=C1N=C2N=C(O)NC2(O)C(=O)N1	C11821	NC(=O)NC1=NC(=O)NC1(O)C(=O)O	C12248	R06601
M00546	2	3	NC(=O)NC1=NC(=O)NC1(O)C(=O)O	C12248	NC(=O)N[C@H]1NC(=O)NC1=O	C02350	R06604
M00546	2	4	NC(=O)N[C@H]1NC(=O)NC1=O	C02350	NC(=O)NC(NC(N)=O)C(=O)O	C00499	R02425
M00546	2	5	NC(=O)NC(NC(N)=O)C(=O)O	C00499	NC(N)=O	C00086	R02422
M00548	1	1	c1ccccc1	C01407	Oc1ccccc1	C00146	R10042
M00548	1	2	Oc1ccccc1	C00146	Oc1ccccc1O	C00090	R10043
M00549	1	1	OC[C@H]1O[C@H](O)[C@H](O)[C@@H](O)[C@@H]1O	C00267	O=P(O)(O)OC[C@H]1O[C@H](O)[C@H](O)[C@@H](O)[C@@H]1O	C00668	R01786;R02189
M00549	1	2	O=P(O)(O)OC[C@H]1O[C@H](O)[C@H](O)[C@@H](O)[C@@H]1O	C00668	O=P(O)(O)O[C@H]1O[C@H](CO)[C@@H](O)[C@H](O)[C@H]1O	C00103	R00959
M00549	1	3	O=P(O)(O)O[C@H]1O[C@H](CO)[C@@H](O)[C@H](O)[C@H]1O	C00103	O=c1ccn([C@@H]2O[C@H](COP(=O)(O)OP(=O)(O)O[C@H]3O[C@H](CO)[C@@H](O)[C@H](O)[C@H]3O)[C@@H](O)[C@H]2O)c(=O)[nH]1	C00029	R00289
M00550	1	1	O=C1O[C@H](C(O)COP(=O)(O)O)C(O)=C1O	C16186	O=C(O)[C@@H](O)C(=O)[C@H](O)[C@@H](O)COP(=O)(O)O	C14899	R07677
M00550	1	2	O=C(O)[C@@H](O)C(=O)[C@H](O)[C@@H](O)COP(=O)(O)O	C14899	O=C(CO)[C@H](O)[C@@H](O)COP(=O)(O)O	C03291	R07125
M00550	1	3	O=C(CO)[C@H](O)[C@@H](O)COP(=O)(O)O	C03291	O=C(CO)[C@@H](O)[C@@H](O)COP(=O)(O)O	C01101	R03244
M00550	1	4	O=C(CO)[C@@H](O)[C@@H](O)COP(=O)(O)O	C01101	O=C(CO)[C@@H](O)[C@H](O)COP(=O)(O)O	C00231	R05850
M00552	1	1	O=C(O)[C@H](O)[C@@H](O)[C@@H](O)[C@H](O)CO	C00880	O=C(O)C(=O)C[C@@H](O)[C@H](O)CO	C01216	R03033
M00552	1	2	O=C(O)C(=O)C[C@@H](O)[C@H](O)CO	C01216	O=C(O)C(=O)C[C@@H](O)[C@H](O)COP(=O)(O)O	C01286	R03387
M00552	1	3	O=C(O)C(=O)C[C@@H](O)[C@H](O)COP(=O)(O)O	C01286	O=C[C@H](O)COP(=O)(O)O	C00118	R01064
M00552	1	4	O=C[C@H](O)COP(=O)(O)O	C00118	O=C(OP(=O)(O)O)[C@H](O)COP(=O)(O)O	C00236	R01061
M00552	1	5	O=C(OP(=O)(O)O)[C@H](O)COP(=O)(O)O	C00236	O=C(O)[C@H](O)COP(=O)(O)O	C00197	R01512
M00555	1	1	C[N+](C)(C)CCO	C00114	C[N+](C)(C)CC=O	C00576	R01022;R01025;R08557;R08558
M00555	1	2	C[N+](C)(C)CC=O	C00576	C[N+](C)(C)CC(=O)[O-]	C00719	R02565;R02566;R08211
M00563	1	1	CN	C00218	CSCCS(=O)(=O)O	C03920	R09998
M00563	1	2	CSCCS(=O)(=O)O	C03920	C[C@@H](OP(=O)(O)O)[C@H](NC(=O)CCCCCCSSCCS(=O)(=O)O)C(=O)O	C04832	R04541
M00563	1	3	C[C@@H](OP(=O)(O)O)[C@H](NC(=O)CCCCCCSSCCS(=O)(=O)O)C(=O)O	C04832	C[C@@H](OP(=O)(O)O)[C@H](NC(=O)CCCCCCS)C(=O)O	C04628	R04540;R11928;R11931;R11943;R11944
M00565	1	1	O=P(O)(O)O[C@H]1O[C@H](CO)[C@@H](O)[C@H](O)[C@H]1O	C00103	Nc1ncnc2c1ncn2[C@@H]1O[C@H](COP(=O)(O)OP(=O)(O)O[C@H]2O[C@H](CO)[C@@H](O)[C@H](O)[C@H]2O)[C@@H](O)[C@H]1O	C00498	R00948
M00567	1	1	O=C=O	C00011	O=CNCc1cc(COc2ccc(CCNC(=O)CC[C@H](NC(=O)CC[C@H](NC(=O)CC[C@H](C(=O)O)[C@@H](CCC(=O)O)C(=O)O)C(=O)O)C(=O)O)cc2)co1	C01001	R03015
M00567	1	2	O=CNCc1cc(COc2ccc(CCNC(=O)CC[C@H](NC(=O)CC[C@H](NC(=O)CC[C@H](C(=O)O)[C@@H](CCC(=O)O)C(=O)O)C(=O)O)C(=O)O)cc2)co1	C01001	C[C@@H]1Nc2nc(N)[nH]c(=O)c2N(C=O)[C@H]1[C@@H](C)Nc1ccc(C[C@H](O)[C@H](O)[C@H](O)CO[C@H]2O[C@H](COP(=O)(O)O[C@@H](CCC(=O)O)C(=O)O)[C@@H](O)[C@H]2O)cc1	C01274	R03390
M00567	1	3	C[C@@H]1Nc2nc(N)[nH]c(=O)c2N(C=O)[C@H]1[C@@H](C)Nc1ccc(C[C@H](O)[C@H](O)[C@H](O)CO[C@H]2O[C@H](COP(=O)(O)O[C@@H](CCC(=O)O)C(=O)O)[C@@H](O)[C@H]2O)cc1	C01274	C[C@@H]1Nc2nc(N)[nH]c(=O)c2N2C=[N+](c3ccc(C[C@H](O)[C@H](O)[C@H](O)CO[C@H]4O[C@H](COP(=O)(O)O[C@@H](CCC(=O)O)C(=O)O)[C@@H](O)[C@H]4O)cc3)[C@H](C)[C@@H]12	C04330	R03464
M00567	1	4	C[C@@H]1Nc2nc(N)[nH]c(=O)c2N2C=[N+](c3ccc(C[C@H](O)[C@H](O)[C@H](O)CO[C@H]4O[C@H](COP(=O)(O)O[C@@H](CCC(=O)O)C(=O)O)[C@@H](O)[C@H]4O)cc3)[C@H](C)[C@@H]12	C04330	C[C@@H]1Nc2nc(N)[nH]c(=O)c2N2CN(c3ccc(C[C@H](O)[C@H](O)[C@H](O)CO[C@H]4O[C@H](COP(=O)(O)O[C@@H](CCC(=O)O)C(=O)O)[C@@H](O)[C@H]4O)cc3)[C@H](C)[C@@H]12	C04377	R04455;R04456
M00567	1	5	C[C@@H]1Nc2nc(N)[nH]c(=O)c2N2CN(c3ccc(C[C@H](O)[C@H](O)[C@H](O)CO[C@H]4O[C@H](COP(=O)(O)O[C@@H](CCC(=O)O)C(=O)O)[C@@H](O)[C@H]4O)cc3)[C@H](C)[C@@H]12	C04377	C[C@@H]1Nc2nc(N)[nH]c(=O)c2N(C)[C@H]1[C@@H](C)Nc1ccc(C[C@H](O)[C@H](O)[C@H](O)CO[C@H]2O[C@H](COP(=O)(O)O[C@@H](CCC(=O)O)C(=O)O)[C@@H](O)[C@H]2O)cc1	C04488	R04464
M00567	2	1	C[C@@H]1Nc2nc(N)[nH]c(=O)c2N2C=[N+](c3ccc(C[C@H](O)[C@H](O)[C@H](O)CO[C@H]4O[C@H](COP(=O)(O)O[C@@H](CCC(=O)O)C(=O)O)[C@@H](O)[C@H]4O)cc3)[C@H](C)[C@@H]12	C04330	C[C@@H]1Nc2nc(N)[nH]c(=O)c2N2CN(c3ccc(C[C@H](O)[C@H](O)[C@H](O)CO[C@H]4O[C@H](COP(=O)(O)O[C@@H](CCC(=O)O)C(=O)O)[C@@H](O)[C@H]4O)cc3)[C@H](C)[C@@H]12	C04377	R04455;R04456
M00567	2	2	C[C@@H]1Nc2nc(N)[nH]c(=O)c2N2CN(c3ccc(C[C@H](O)[C@H](O)[C@H](O)CO[C@H]4O[C@H](COP(=O)(O)O[C@@H](CCC(=O)O)C(=O)O)[C@@H](O)[C@H]4O)cc3)[C@H](C)[C@@H]12	C04377	C[C@@H]1Nc2nc(N)[nH]c(=O)c2N(C)[C@H]1[C@@H](C)Nc1ccc(C[C@H](O)[C@H](O)[C@H](O)CO[C@H]2O[C@H](COP(=O)(O)O[C@@H](CCC(=O)O)C(=O)O)[C@@H](O)[C@H]2O)cc1	C04488	R04464
M00567	2	3	C[C@@H]1Nc2nc(N)[nH]c(=O)c2N(C)[C@H]1[C@@H](C)Nc1ccc(C[C@H](O)[C@H](O)[C@H](O)CO[C@H]2O[C@H](COP(=O)(O)O[C@@H](CCC(=O)O)C(=O)O)[C@@H](O)[C@H]2O)cc1	C04488	CSCCS(=O)(=O)O	C03920	R04347
M00567	2	4	CSCCS(=O)(=O)O	C03920	C[C@@H](OP(=O)(O)O)[C@H](NC(=O)CCCCCCSSCCS(=O)(=O)O)C(=O)O	C04832	R04541
M00567	2	5	C[C@@H](OP(=O)(O)O)[C@H](NC(=O)CCCCCCSSCCS(=O)(=O)O)C(=O)O	C04832	O=S(=O)(O)CCS	C03576	R04540;R11928;R11931;R11943;R11944
M00568	1	1	Oc1ccccc1O	C00090	O=C(O)/C=C\C=C/C(=O)O	C02480	R00817
M00568	1	2	O=C(O)/C=C\C=C/C(=O)O	C02480	O=C(O)C[C@H]1C=CC(=O)O1	C14610	R06989
M00568	1	3	O=C(O)C[C@H]1C=CC(=O)O1	C14610	O=C(O)CC1=CCC(=O)O1	C03586	R06990
M00568	1	4	O=C(O)CC1=CCC(=O)O1	C03586	O=C(O)CCC(=O)CC(=O)O	C00846	R02991
M00570	1	1	C[C@@H](O)[C@H](N)C(=O)O	C00188	CCC(=O)C(=O)O	C00109	R00996
M00570	1	2	CCC(=O)C(=O)O	C00109	CC[C@](O)(C(C)=O)C(=O)O	C06006	R08648
M00570	1	3	CC[C@](O)(C(C)=O)C(=O)O	C06006	CC[C@@](C)(O)C(=O)C(=O)O	C14463	R05069
M00570	1	4	CC[C@@](C)(O)C(=O)C(=O)O	C14463	CC[C@@](C)(O)[C@@H](O)C(=O)O	C06007	R05068
M00570	1	5	CC[C@@](C)(O)[C@@H](O)C(=O)O	C06007	CC[C@H](C)C(=O)C(=O)O	C00671	R05070
M00570	2	1	CCC(=O)C(=O)O	C00109	CC[C@](O)(C(C)=O)C(=O)O	C06006	R08648
M00570	2	2	CC[C@](O)(C(C)=O)C(=O)O	C06006	CC[C@@](C)(O)C(=O)C(=O)O	C14463	R05069
M00570	2	3	CC[C@@](C)(O)C(=O)C(=O)O	C14463	CC[C@@](C)(O)[C@@H](O)C(=O)O	C06007	R05068
M00570	2	4	CC[C@@](C)(O)[C@@H](O)C(=O)O	C06007	CC[C@H](C)C(=O)C(=O)O	C00671	R05070
M00570	2	5	CC[C@H](C)C(=O)C(=O)O	C00671	CC[C@H](C)[C@H](N)C(=O)O	C00407	R02199
M00573	1	1	CC(N)C(=O)CCCCCC(=O)O	C01092	CC(N)C(N)CCCCCC(=O)O	C01037	R10699
M00573	1	2	CC(N)C(N)CCCCCC(=O)O	C01037	CC1NC(=O)NC1CCCCCC(=O)O	C01909	R03182
M00577	1	1	O=C(O)CCCCCC(=O)O	C02656	CC(C)(COP(=O)(O)OP(=O)(O)OC[C@H]1O[C@@H](n2cnc3c(N)ncnc32)[C@H](O)[C@@H]1OP(=O)(O)O)[C@@H](O)C(=O)NCCC(=O)NCCSC(=O)CCCCCC(=O)O	C01063	R03209
M00577	1	2	CC(C)(COP(=O)(O)OP(=O)(O)OC[C@H]1O[C@@H](n2cnc3c(N)ncnc32)[C@H](O)[C@@H]1OP(=O)(O)O)[C@@H](O)C(=O)NCCC(=O)NCCSC(=O)CCCCCC(=O)O	C01063	CC(N)C(=O)CCCCCC(=O)O	C01092	R03210
M00577	1	3	CC(N)C(=O)CCCCCC(=O)O	C01092	CC(N)C(N)CCCCCC(=O)O	C01037	R03231
M00577	1	4	CC(N)C(N)CCCCCC(=O)O	C01037	CC1NC(=O)NC1CCCCCC(=O)O	C01909	R03182
M00579	1	1	CC(=O)SCCNC(=O)CCNC(=O)[C@H](O)C(C)(C)COP(=O)(O)OP(=O)(O)OC[C@H]1O[C@@H](n2cnc3c(N)ncnc32)[C@H](O)[C@@H]1OP(=O)(O)O	C00024	CC(=O)OP(=O)(O)O	C00227	R00230
M00579	1	2	CC(=O)OP(=O)(O)O	C00227	CC(=O)O	C00033	R00315
M00580	1	1	O=P(O)(O)OC[C@H]1O[C@](O)(CO)[C@@H](O)[C@@H]1O	C05345	O=C([C@H](O)CO)[C@H](O)[C@H](O)COP(=O)(O)O	C06019	R09780
M00580	1	2	O=C([C@H](O)CO)[C@H](O)[C@H](O)COP(=O)(O)O	C06019	O=C(CO)[C@H](O)[C@H](O)COP(=O)(O)O	C00199	R05338
M00580	1	3	O=C(CO)[C@H](O)[C@H](O)COP(=O)(O)O	C00199	O=P(O)(O)OC[C@H]1OC(O)[C@H](O)[C@@H]1O	C00117	R01056
M00596	1	1	O=S(=O)(O)O	C00059	Nc1ncnc2c1ncn2[C@@H]1O[C@H](COP(=O)(O)OS(=O)(=O)O)[C@@H](O)[C@H]1O	C00224	R00529
M00596	1	2	Nc1ncnc2c1ncn2[C@@H]1O[C@H](COP(=O)(O)OS(=O)(=O)O)[C@@H](O)[C@H]1O	C00224	O=S(O)O	C00094	R08553
M00596	1	3	O=S(O)O	C00094	S	C00283	R00861
M00608	1	1	CC(=O)SCCNC(=O)CCNC(=O)[C@H](O)C(C)(C)COP(=O)(O)OP(=O)(O)OC[C@H]1O[C@@H](n2cnc3c(N)ncnc32)[C@H](O)[C@@H]1OP(=O)(O)O	C00024	O=C(O)CC[C@@](O)(CC(=O)O)C(=O)O	C01251	R00271
M00608	1	2	O=C(O)CC[C@@](O)(CC(=O)O)C(=O)O	C01251	O=C(O)/C=C(/CCC(=O)O)C(=O)O	C04002	R03444
M00608	1	3	O=C(O)/C=C(/CCC(=O)O)C(=O)O	C04002	O=C(O)CC[C@H](C(=O)O)[C@@H](O)C(=O)O	C05662	R04371
M00608	1	4	O=C(O)CC[C@H](C(=O)O)[C@@H](O)C(=O)O	C05662	O=C(O)CCCC(=O)C(=O)O	C00322	R01934
M00608	1	5	O=C(O)CCCC(=O)C(=O)O	C00322	O=C(O)CCC[C@@](O)(CC(=O)O)C(=O)O	C16583	R08331
M00608	2	1	O=C(O)/C=C(/CCCC(=O)O)C(=O)O	C20581	O=C(O)CCC[C@H](C(=O)O)[C@@H](O)C(=O)O	C16597	R10393
M00608	2	2	O=C(O)CCC[C@H](C(=O)O)[C@@H](O)C(=O)O	C16597	O=C(O)CCCCC(=O)C(=O)O	C16588	R08214
M00608	2	3	O=C(O)CCCCC(=O)C(=O)O	C16588	O=C(O)CCCC[C@@](O)(CC(=O)O)C(=O)O	C16598	R08332
M00608	2	4	O=C(O)CCCC[C@@](O)(CC(=O)O)C(=O)O	C16598	O=C(O)/C=C(/CCCCC(=O)O)C(=O)O	C20582	R10395
M00608	2	5	O=C(O)/C=C(/CCCCC(=O)O)C(=O)O	C20582	O=C(O)CCCC[C@H](C(=O)O)[C@@H](O)C(=O)O	C16600	R10396
M00608	3	1	O=C(O)CCC[C@H](C(=O)O)[C@@H](O)C(=O)O	C16597	O=C(O)CCCCC(=O)C(=O)O	C16588	R08214
M00608	3	2	O=C(O)CCCCC(=O)C(=O)O	C16588	O=C(O)CCCC[C@@](O)(CC(=O)O)C(=O)O	C16598	R08332
M00608	3	3	O=C(O)CCCC[C@@](O)(CC(=O)O)C(=O)O	C16598	O=C(O)/C=C(/CCCCC(=O)O)C(=O)O	C20582	R10395
M00608	3	4	O=C(O)/C=C(/CCCCC(=O)O)C(=O)O	C20582	O=C(O)CCCC[C@H](C(=O)O)[C@@H](O)C(=O)O	C16600	R10396
M00608	3	5	O=C(O)CCCC[C@H](C(=O)O)[C@@H](O)C(=O)O	C16600	O=C(O)CCCCCC(=O)C(=O)O	C16589	R08215
M00609	1	1	CSCC[C@H](N)C(=O)O	C00073	C[S+](CC[C@H](N)C(=O)[O-])C[C@H]1O[C@@H](n2cnc3c(N)ncnc32)[C@H](O)[C@@H]1O	C00019	R00177
M00609	2	1	Nc1ncnc2c1ncn2[C@@H]1O[C@H](CSCC[C@H](N)C(=O)O)[C@@H](O)[C@H]1O	C00021	N[C@@H](CCSC[C@H]1OC(O)[C@H](O)[C@@H]1O)C(=O)O	C03539	R00194
M00609	2	2	N[C@@H](CCSC[C@H]1OC(O)[C@H](O)[C@@H]1O)C(=O)O	C03539	N[C@@H](CCS)C(=O)O	C00155	R01291
M00609	2	3	N[C@@H](CCS)C(=O)O	C00155	N[C@@H](CCSC[C@H](N)C(=O)O)C(=O)O	C02291	R10305
M00609	2	4	N[C@@H](CCSC[C@H](N)C(=O)O)C(=O)O	C02291	N[C@@H](CS)C(=O)O	C00097	R01001
M00620	1	1	CC(=O)SCCNC(=O)CCNC(=O)[C@H](O)C(C)(C)COP(=O)(O)OP(=O)(O)OC[C@H]1O[C@@H](n2cnc3c(N)ncnc32)[C@H](O)[C@@H]1OP(=O)(O)O	C00024	CC(=O)C(=O)O	C00022	R01196
M00620	1	2	CC(=O)C(=O)O	C00022	O=C(O)CC(=O)C(=O)O	C00036	R00344
M00620	1	3	O=C(O)CC(=O)C(=O)O	C00036	O=C(O)C[C@H](O)C(=O)O	C00149	R00342
M00620	1	4	O=C(O)C[C@H](O)C(=O)O	C00149	O=C(O)/C=C/C(=O)O	C00122	R01082
M00620	1	5	O=C(O)/C=C/C(=O)O	C00122	O=C(O)CCC(=O)O	C00042	R10660
M00620	2	1	O=C(O)CC(=O)C(=O)O	C00036	O=C(O)C[C@H](O)C(=O)O	C00149	R00342
M00620	2	2	O=C(O)C[C@H](O)C(=O)O	C00149	O=C(O)/C=C/C(=O)O	C00122	R01082
M00620	2	3	O=C(O)/C=C/C(=O)O	C00122	O=C(O)CCC(=O)O	C00042	R10660
M00620	2	4	O=C(O)CCC(=O)O	C00042	CC(C)(COP(=O)(O)OP(=O)(O)OC[C@H]1O[C@@H](n2cnc3c(N)ncnc32)[C@H](O)[C@@H]1OP(=O)(O)O)[C@@H](O)C(=O)NCCC(=O)NCCSC(=O)CCC(=O)O	C00091	R00405
M00620	2	5	CC(C)(COP(=O)(O)OP(=O)(O)OC[C@H]1O[C@@H](n2cnc3c(N)ncnc32)[C@H](O)[C@@H]1OP(=O)(O)O)[C@@H](O)C(=O)NCCC(=O)NCCSC(=O)CCC(=O)O	C00091	O=C(O)CCC(=O)C(=O)O	C00026	R01197
M00622	1	1	O=C(O)c1ccc(O)nc1	C01020	Oc1ccc(O)nc1	C01059	R08764
M00622	1	2	Oc1ccc(O)nc1	C01059	O=CNC(=O)/C=C\C(=O)O	C18232	R09125
M00622	1	3	O=CNC(=O)/C=C\C(=O)O	C18232	NC(=O)/C=C\C(=O)O	C01596	R09126
M00622	1	4	NC(=O)/C=C\C(=O)O	C01596	O=C(O)/C=C\C(=O)O	C01384	R03540
M00622	1	5	O=C(O)/C=C\C(=O)O	C01384	O=C(O)/C=C/C(=O)O	C00122	R01087
M00623	1	1	O=C(O)c1ccccc1C(=O)O	C01606	O=C(O)C1=C[C@H](O)[C@H](O)C=C1C(=O)O	C04783	R03630
M00623	1	2	O=C(O)C1=C[C@H](O)[C@H](O)C=C1C(=O)O	C04783	O=C(O)c1cc(O)c(O)cc1C(=O)O	C03233	R05275
M00623	1	3	O=C(O)c1cc(O)c(O)cc1C(=O)O	C03233	O=C(O)c1ccc(O)c(O)c1	C00230	R01635
M00624	1	1	O=C(O)c1ccc(C(=O)O)cc1	C06337	O=C(O)C1=C[C@H](O)[C@@](O)(C(=O)O)C=C1	C06318	R05148
M00624	1	2	O=C(O)C1=C[C@H](O)[C@@](O)(C(=O)O)C=C1	C06318	O=C(O)c1ccc(O)c(O)c1	C00230	R01633
M00630	1	1	O=C(O)[C@H]1OC(O)[C@H](O)[C@@H](O)[C@H]1O	C00333	O=C(O)[C@@H](O)[C@H](O)[C@H](O)[C@@H](O)CO	C15930	R07676;R10565
M00630	1	2	O=C(O)[C@@H](O)[C@H](O)[C@H](O)[C@@H](O)CO	C15930	O=C(O)C(=O)C[C@H](O)[C@@H](O)CO	C20680	R10532
M00630	1	3	O=C(O)C(=O)C[C@H](O)[C@@H](O)CO	C20680	O=C[C@@H](O)CO	C02426	R10550
M00630	1	4	O=C[C@@H](O)CO	C02426	OCC(O)CO	C00116	R10563
M00631	1	1	O=C(O)[C@H]1OC(O)[C@H](O)[C@@H](O)[C@H]1O	C00333	O=C(O)[C@H]1OC(O)(CO)[C@@H](O)[C@H]1O	C00558	R01983
M00631	1	2	O=C(O)[C@H]1OC(O)(CO)[C@@H](O)[C@H]1O	C00558	O=C(O)[C@@H](O)[C@H](O)[C@H](O)[C@H](O)CO	C00817	R02555
M00631	1	3	O=C(O)[C@@H](O)[C@H](O)[C@H](O)[C@H](O)CO	C00817	O=C(O)C(=O)C[C@H](O)[C@H](O)CO	C00204	R01540
M00631	1	4	O=C(O)C(=O)C[C@H](O)[C@H](O)CO	C00204	O=C(O)C(=O)C[C@H](O)[C@H](O)COP(=O)(O)O	C04442	R01541
M00631	1	5	O=C(O)C(=O)C[C@H](O)[C@H](O)COP(=O)(O)O	C04442	O=C[C@H](O)COP(=O)(O)O	C00118	R05605
M00632	1	1	OC[C@H]1O[C@H](O)[C@H](O)[C@@H](O)[C@H]1O	C00984	O=P(O)(O)O[C@H]1O[C@H](CO)[C@H](O)[C@H](O)[C@H]1O	C00446	R01092
M00632	2	1	O=c1ccn([C@@H]2O[C@H](COP(=O)(O)OP(=O)(O)O[C@H]3O[C@H](CO)[C@H](O)[C@H](O)[C@H]3O)[C@@H](O)[C@H]2O)c(=O)[nH]1	C00052	O=c1ccn([C@@H]2O[C@H](COP(=O)(O)OP(=O)(O)O[C@H]3O[C@H](CO)[C@@H](O)[C@H](O)[C@H]3O)[C@@H](O)[C@H]2O)c(=O)[nH]1	C00029	R00291
M00633	1	1	O=C(O)[C@H](O)[C@@H](O)[C@H](O)[C@H](O)CO	C00257	O=C(O)C(=O)C[C@H](O)[C@H](O)CO	C00204	R01538
M00633	1	2	O=C(O)C(=O)C[C@H](O)[C@H](O)CO	C00204	O=C(O)C(=O)C[C@H](O)[C@H](O)COP(=O)(O)O	C04442	R01541
M00633	1	3	O=C(O)C(=O)C[C@H](O)[C@H](O)COP(=O)(O)O	C04442	O=C[C@H](O)COP(=O)(O)O	C00118	R05605
M00633	1	4	O=C[C@H](O)COP(=O)(O)O	C00118	O=C(O)[C@H](O)COP(=O)(O)O	C00197	R01058;R10860
M00636	1	1	O=C(O)c1ccccc1C(=O)O	C01606	O=C(O)C1=C(C(=O)O)[C@@H](O)[C@@H](O)C=C1	C18314	R09227
M00636	1	2	O=C(O)C1=C(C(=O)O)[C@@H](O)[C@@H](O)C=C1	C18314	O=C(O)c1ccc(O)c(O)c1C(=O)O	C03223	R09228
M00636	1	3	O=C(O)c1ccc(O)c(O)c1C(=O)O	C03223	O=C(O)c1ccc(O)c(O)c1	C00230	R01634
M00637	1	1	Nc1ccccc1C(=O)O	C00108	Oc1ccccc1O	C00090	R00823;R00825
M00638	1	1	O=C(O)c1ccccc1O	C00805	O=C(O)c1cc(O)ccc1O	C00628	R07709;R07710
M00661	1	1	CC(C)=CCC/C(C)=C/CC/C(C)=C/CC/C(C)=C/COP(=O)(O)OP(=O)(O)O	C00353	CC(C)=CCC/C(C)=C/CC/C(C)=C/CC/C(C)=C/Cc1c[nH]c2ccccc12	C20525	R10349
M00661	1	2	CC(C)=CCC/C(C)=C/CC/C(C)=C/CC/C(C)=C/Cc1c[nH]c2ccccc12	C20525	CC(C)=CCC[C@]1(C)O[C@H]1CC/C(C)=C/CC/C(C)=C/Cc1c[nH]c2ccccc12	C20526	R10350
M00661	1	3	CC(C)=CCC[C@]1(C)O[C@H]1CC/C(C)=C/CC/C(C)=C/Cc1c[nH]c2ccccc12	C20526	CC(C)=CCC[C@]1(C)[C@@H](O)CC[C@@]2(C)[C@H]1CC[C@H]1Cc3c([nH]c4ccccc34)[C@@]12C	C20527	R10352
M00661	1	4	CC(C)=CCC[C@]1(C)[C@@H](O)CC[C@@]2(C)[C@H]1CC[C@H]1Cc3c([nH]c4ccccc34)[C@@]12C	C20527	CC1(C)O[C@@H]1CC[C@]1(C)[C@@H](O)CC[C@@]2(C)[C@H]1CC[C@H]1Cc3c([nH]c4ccccc34)[C@@]12C	C20529	R10351
M00672	1	1	N[C@@H](CS)C(=O)O	C00097	CC(C)[C@@H](NC(=O)[C@H](CS)NC(=O)CCC[C@H](N)C(=O)O)C(=O)O	C05556	R04870
M00672	1	2	CC(C)[C@@H](NC(=O)[C@H](CS)NC(=O)CCC[C@H](N)C(=O)O)C(=O)O	C05556	CC1(C)S[C@@H]2[C@H](NC(=O)CCC[C@H](N)C(=O)O)C(=O)N2[C@H]1C(=O)O	C05557	R04872
M00673	1	1	N[C@@H](CS)C(=O)O	C00097	CC(C)[C@@H](NC(=O)[C@H](CS)NC(=O)CCC[C@H](N)C(=O)O)C(=O)O	C05556	R04870
M00673	1	2	CC(C)[C@@H](NC(=O)[C@H](CS)NC(=O)CCC[C@H](N)C(=O)O)C(=O)O	C05556	CC1(C)S[C@@H]2[C@H](NC(=O)CCC[C@H](N)C(=O)O)C(=O)N2[C@H]1C(=O)O	C05557	R04872
M00673	1	3	CC1(C)S[C@@H]2[C@H](NC(=O)CCC[C@H](N)C(=O)O)C(=O)N2[C@H]1C(=O)O	C05557	CC1(C)S[C@@H]2[C@H](NC(=O)CCC[C@@H](N)C(=O)O)C(=O)N2[C@H]1C(=O)O	C06564	R04147
M00673	1	4	CC1(C)S[C@@H]2[C@H](NC(=O)CCC[C@@H](N)C(=O)O)C(=O)N2[C@H]1C(=O)O	C06564	CC1=C(C(=O)O)N2C(=O)[C@@H](NC(=O)CCC[C@@H](N)C(=O)O)[C@H]2SC1	C06565	R05301
M00673	1	5	CC1=C(C(=O)O)N2C(=O)[C@@H](NC(=O)CCC[C@@H](N)C(=O)O)[C@H]2SC1	C06565	N[C@H](CCCC(=O)N[C@@H]1C(=O)N2C(C(=O)O)=C(CO)CS[C@H]12)C(=O)O	C03112	R05229
M00673	2	1	CC1(C)S[C@@H]2[C@H](NC(=O)CCC[C@@H](N)C(=O)O)C(=O)N2[C@H]1C(=O)O	C06564	CC1=C(C(=O)O)N2C(=O)[C@@H](NC(=O)CCC[C@@H](N)C(=O)O)[C@H]2SC1	C06565	R05301
M00673	2	2	CC1=C(C(=O)O)N2C(=O)[C@@H](NC(=O)CCC[C@@H](N)C(=O)O)[C@H]2SC1	C06565	N[C@H](CCCC(=O)N[C@@H]1C(=O)N2C(C(=O)O)=C(CO)CS[C@H]12)C(=O)O	C03112	R05229
M00673	2	3	N[C@H](CCCC(=O)N[C@@H]1C(=O)N2C(C(=O)O)=C(CO)CS[C@H]12)C(=O)O	C03112	NC(=O)OCC1=C(C(=O)O)N2C(=O)[C@@H](NC(=O)CCC[C@@H](N)C(=O)O)[C@H]2SC1	C06568	R05230
M00673	2	4	NC(=O)OCC1=C(C(=O)O)N2C(=O)[C@@H](NC(=O)CCC[C@@H](N)C(=O)O)[C@H]2SC1	C06568	NC(=O)OCC1=C(C(=O)O)N2C(=O)[C@@](O)(NC(=O)CCC[C@@H](N)C(=O)O)[C@H]2SC1	C06569	R05302
M00673	2	5	NC(=O)OCC1=C(C(=O)O)N2C(=O)[C@@](O)(NC(=O)CCC[C@@H](N)C(=O)O)[C@H]2SC1	C06569	CO[C@@]1(NC(=O)CCC[C@@H](N)C(=O)O)C(=O)N2C(C(=O)O)=C(COC(N)=O)CS[C@@H]21	C06566	R05303
M00674	1	1	N=C(N)NCCC[C@H](N)C(=O)O	C00062	N=C(N)NCCC[C@H](NCCC(=O)O)C(=O)O	C06655	R05465
M00674	1	2	N=C(N)NCCC[C@H](NCCC(=O)O)C(=O)O	C06655	N=C(N)NCCC[C@@H](C(=O)O)N1CCC1=O	C06656	R05467
M00674	1	3	N=C(N)NCCC[C@@H](C(=O)O)N1CCC1=O	C06656	N=C(N)NCC[C@@H](O)[C@@H](C(=O)O)N1CCC1=O	C06657	R05466
M00674	1	4	N=C(N)NCC[C@@H](O)[C@@H](C(=O)O)N1CCC1=O	C06657	NCC[C@@H](O)[C@@H](C(=O)O)N1CCC1=O	C06658	R05357
M00674	1	5	NCC[C@@H](O)[C@@H](C(=O)O)N1CCC1=O	C06658	NCC[C@H]1O[C@H]2CC(=O)N2[C@@H]1C(=O)O	C06659	R05468
M00674	2	1	N=C(N)NCCC[C@H](NCCC(=O)O)C(=O)O	C06655	N=C(N)NCCC[C@@H](C(=O)O)N1CCC1=O	C06656	R05467
M00674	2	2	N=C(N)NCCC[C@@H](C(=O)O)N1CCC1=O	C06656	N=C(N)NCC[C@@H](O)[C@@H](C(=O)O)N1CCC1=O	C06657	R05466
M00674	2	3	N=C(N)NCC[C@@H](O)[C@@H](C(=O)O)N1CCC1=O	C06657	NCC[C@@H](O)[C@@H](C(=O)O)N1CCC1=O	C06658	R05357
M00674	2	4	NCC[C@@H](O)[C@@H](C(=O)O)N1CCC1=O	C06658	NCC[C@H]1O[C@H]2CC(=O)N2[C@@H]1C(=O)O	C06659	R05468
M00674	2	5	NCC[C@H]1O[C@H]2CC(=O)N2[C@@H]1C(=O)O	C06659	NC/C=C1\O[C@H]2CC(=O)N2[C@@H]1C(=O)O	C06660	R05469
M00675	1	1	CC(C)(COP(=O)(O)OP(=O)(O)OC[C@H]1O[C@@H](n2cnc3c(N)ncnc32)[C@H](O)[C@@H]1OP(=O)(O)O)[C@@H](O)C(=O)NCCC(=O)NCCSC(=O)CC(=O)O	C00083	O=C(O)C[C@@H]1CC[C@@H](C(=O)O)N1	C17366	R10485
M00675	1	2	O=C(O)C[C@@H]1CC[C@@H](C(=O)O)N1	C17366	O=C(O)[C@@H]1CC[C@H]2CC(=O)N21	C17367	R10556
M00736	1	1	O=C(N[C@H]1CN([C@@H](C(=O)O)c2ccc(O)cc2)C1=O)/C(=N\O)c1ccc(O)cc1	C01739	N[C@@H](CCOc1ccc(/C(=N/O)C(=O)N[C@H]2CN([C@@H](C(=O)O)c3ccc(O)cc3)C2=O)cc1)C(=O)O	C00927	R03072
M00736	1	2	N[C@@H](CCOc1ccc(/C(=N/O)C(=O)N[C@H]2CN([C@@H](C(=O)O)c3ccc(O)cc3)C2=O)cc1)C(=O)O	C00927	N[C@H](CCOc1ccc(/C(=N/O)C(=O)N[C@H]2CN([C@@H](C(=O)O)c3ccc(O)cc3)C2=O)cc1)C(=O)O	C01941	R03073
M00740	1	1	CC(=O)SCCNC(=O)CCNC(=O)[C@H](O)C(C)(C)COP(=O)(O)OP(=O)(O)OC[C@H]1O[C@@H](n2cnc3c(N)ncnc32)[C@H](O)[C@@H]1OP(=O)(O)O	C00024	O=C(O)CC(O)(CC(=O)O)C(=O)O	C00158	R00351
M00740	1	2	O=C(O)CC(O)(CC(=O)O)C(=O)O	C00158	O=C(O)/C=C(/CC(=O)O)C(=O)O	C00417	R01325
M00740	1	3	O=C(O)/C=C(/CC(=O)O)C(=O)O	C00417	O=C(O)CC(C(=O)O)C(O)C(=O)O	C00311	R01900
M00740	1	4	O=C(O)CC(C(=O)O)C(O)C(=O)O	C00311	O=C(O)CC(C(=O)O)C(=O)C(=O)O	C05379	R01899
M00740	1	5	O=C(O)CC(C(=O)O)C(=O)C(=O)O	C05379	O=C(O)CCC(=O)C(=O)O	C00026	R00268
M00740	2	1	N[C@@H](CCC(=O)O)C(=O)O	C00025	C[C@H](C(=O)O)[C@H](N)C(=O)O	C03618	R00262
M00740	2	2	C[C@H](C(=O)O)[C@H](N)C(=O)O	C03618	C/C(=C\C(=O)O)C(=O)O	C01732	R03696
M00740	2	3	C/C(=C\C(=O)O)C(=O)O	C01732	C/C(=C\C(=O)O)C(=O)SCCNC(=O)CCNC(=O)[C@H](O)C(C)(C)COP(=O)(O)OP(=O)(O)OC[C@H]1O[C@@H](n2cnc3c(N)ncnc32)[C@H](O)[C@@H]1OP(=O)(O)O	C06028	R10904
M00740	2	4	C/C(=C\C(=O)O)C(=O)SCCNC(=O)CCNC(=O)[C@H](O)C(C)(C)COP(=O)(O)OP(=O)(O)OC[C@H]1O[C@@H](n2cnc3c(N)ncnc32)[C@H](O)[C@@H]1OP(=O)(O)O	C06028	C[C@@H](C(=O)SCCNC(=O)CCNC(=O)[C@H](O)C(C)(C)COP(=O)(O)OP(=O)(O)OC[C@H]1O[C@@H](n2cnc3c(N)ncnc32)[C@H](O)[C@@H]1OP(=O)(O)O)[C@H](O)C(=O)O	C06027	R05076
M00740	2	5	C[C@@H](C(=O)SCCNC(=O)CCNC(=O)[C@H](O)C(C)(C)COP(=O)(O)OP(=O)(O)OC[C@H]1O[C@@H](n2cnc3c(N)ncnc32)[C@H](O)[C@@H]1OP(=O)(O)O)[C@H](O)C(=O)O	C06027	O=CC(=O)O	C00048	R00934
M00740	3	1	C/C(=C\C(=O)O)C(=O)SCCNC(=O)CCNC(=O)[C@H](O)C(C)(C)COP(=O)(O)OP(=O)(O)OC[C@H]1O[C@@H](n2cnc3c(N)ncnc32)[C@H](O)[C@@H]1OP(=O)(O)O	C06028	C[C@@H](C(=O)SCCNC(=O)CCNC(=O)[C@H](O)C(C)(C)COP(=O)(O)OP(=O)(O)OC[C@H]1O[C@@H](n2cnc3c(N)ncnc32)[C@H](O)[C@@H]1OP(=O)(O)O)[C@H](O)C(=O)O	C06027	R05076
M00740	3	2	C[C@@H](C(=O)SCCNC(=O)CCNC(=O)[C@H](O)C(C)(C)COP(=O)(O)OP(=O)(O)OC[C@H]1O[C@@H](n2cnc3c(N)ncnc32)[C@H](O)[C@@H]1OP(=O)(O)O)[C@H](O)C(=O)O	C06027	O=CC(=O)O	C00048	R00934
M00740	3	3	O=CC(=O)O	C00048	CC(C)(COP(=O)(O)OP(=O)(O)OC[C@H]1O[C@@H](n2cnc3c(N)ncnc32)[C@H](O)[C@@H]1OP(=O)(O)O)[C@@H](O)C(=O)NCCC(=O)NCCSC(=O)C[C@H](O)C(=O)O	C04348	R00473
M00740	3	4	CC(C)(COP(=O)(O)OP(=O)(O)OC[C@H]1O[C@@H](n2cnc3c(N)ncnc32)[C@H](O)[C@@H]1OP(=O)(O)O)[C@@H](O)C(=O)NCCC(=O)NCCSC(=O)C[C@H](O)C(=O)O	C04348	O=C(O)C[C@H](O)C(=O)O	C00149	R10612
M00740	3	5	O=C(O)C[C@H](O)C(=O)O	C00149	O=C(O)CC(=O)C(=O)O	C00036	R00342
M00741	1	1	CCC(=O)SCCNC(=O)CCNC(=O)[C@H](O)C(C)(C)COP(=O)(O)OP(=O)(O)OC[C@H]1O[C@@H](n2cnc3c(N)ncnc32)[C@H](O)[C@@H]1OP(=O)(O)O	C00100	C[C@@H](C(=O)O)C(=O)SCCNC(=O)CCNC(=O)[C@H](O)C(C)(C)COP(=O)(O)OP(=O)(O)OC[C@H]1O[C@@H](n2cnc3c(N)ncnc32)[C@H](O)[C@@H]1OP(=O)(O)O	C00683	R01859
M00741	1	2	C[C@@H](C(=O)O)C(=O)SCCNC(=O)CCNC(=O)[C@H](O)C(C)(C)COP(=O)(O)OP(=O)(O)OC[C@H]1O[C@@H](n2cnc3c(N)ncnc32)[C@H](O)[C@@H]1OP(=O)(O)O	C00683	C[C@H](C(=O)O)C(=O)SCCNC(=O)CCNC(=O)[C@H](O)C(C)(C)COP(=O)(O)OP(=O)(O)OC[C@H]1O[C@@H](n2cnc3c(N)ncnc32)[C@H](O)[C@@H]1OP(=O)(O)O	C01213	R02765
M00741	1	3	C[C@H](C(=O)O)C(=O)SCCNC(=O)CCNC(=O)[C@H](O)C(C)(C)COP(=O)(O)OP(=O)(O)OC[C@H]1O[C@@H](n2cnc3c(N)ncnc32)[C@H](O)[C@@H]1OP(=O)(O)O	C01213	CC(C)(COP(=O)(O)OP(=O)(O)OC[C@H]1O[C@@H](n2cnc3c(N)ncnc32)[C@H](O)[C@@H]1OP(=O)(O)O)[C@@H](O)C(=O)NCCC(=O)NCCSC(=O)CCC(=O)O	C00091	R00833
M00761	1	1	O=C(O)[C@H]1O[C@H](OP(=O)(O)OP(=O)(O)OC[C@H]2O[C@@H](n3ccc(=O)[nH]c3=O)[C@H](O)[C@@H]2O)[C@H](O)[C@@H](O)[C@@H]1O	C00167	O=C1CO[C@H](OP(=O)(O)OP(=O)(O)OC[C@H]2O[C@@H](n3ccc(=O)[nH]c3=O)[C@H](O)[C@@H]2O)[C@H](O)[C@H]1O	C16155	R07658
M00761	1	2	O=C1CO[C@H](OP(=O)(O)OP(=O)(O)OC[C@H]2O[C@@H](n3ccc(=O)[nH]c3=O)[C@H](O)[C@@H]2O)[C@H](O)[C@H]1O	C16155	N[C@H]1CO[C@H](OP(=O)(O)OP(=O)(O)OC[C@H]2O[C@@H](n3ccc(=O)[nH]c3=O)[C@H](O)[C@@H]2O)[C@H](O)[C@H]1O	C16153	R07659
M00761	1	3	N[C@H]1CO[C@H](OP(=O)(O)OP(=O)(O)OC[C@H]2O[C@@H](n3ccc(=O)[nH]c3=O)[C@H](O)[C@@H]2O)[C@H](O)[C@H]1O	C16153	O=CN[C@H]1CO[C@H](OP(=O)(O)OP(=O)(O)OC[C@H]2O[C@@H](n3ccc(=O)[nH]c3=O)[C@H](O)[C@@H]2O)[C@H](O)[C@H]1O	C16154	R07660
M00761	2	1	CC(C)=CCC/C(C)=C/CC/C(C)=C/CC/C(C)=C\CC/C(C)=C\CC/C(C)=C\CC/C(C)=C\CC/C(C)=C\CC/C(C)=C\CC/C(C)=C\CC/C(C)=C\COP(=O)(O)O[C@@H]1OC[C@H](NC=O)[C@H](O)[C@H]1O	C16156	CC(C)=CCC/C(C)=C/CC/C(C)=C/CC/C(C)=C\CC/C(C)=C\CC/C(C)=C\CC/C(C)=C\CC/C(C)=C\CC/C(C)=C\CC/C(C)=C\CC/C(C)=C\COP(=O)(O)O[C@@H]1OC[C@H](N)[C@H](O)[C@H]1O	C16157	R07662
M00773	1	1	CC[C@H]1C[C@@H](C)C(=O)/C=C/C(C)=C/[C@H](C)[C@@H](CC)OC(=O)C[C@@H](O)[C@H](C)[C@H]1O	C12000	CC[C@H]1C[C@@H](C)C(=O)/C=C/C(C)=C/[C@H](C)[C@@H](CC)OC(=O)C[C@@H](O)[C@H](C)[C@H]1O[C@@H]1O[C@H](C)[C@@H](O)[C@H](N(C)C)[C@H]1O	C12001	R06450
M00773	1	2	CC[C@H]1C[C@@H](C)C(=O)/C=C/C(C)=C/[C@H](C)[C@@H](CC)OC(=O)C[C@@H](O)[C@H](C)[C@H]1O[C@@H]1O[C@H](C)[C@@H](O)[C@H](N(C)C)[C@H]1O	C12001	CC[C@H]1OC(=O)C[C@@H](O)[C@H](C)[C@@H](O[C@@H]2O[C@H](C)[C@@H](O)[C@H](N(C)C)[C@H]2O)[C@@H](CC=O)C[C@@H](C)C(=O)/C=C/C(C)=C/[C@@H]1C	C20760	R06449
M00773	1	3	CC[C@H]1OC(=O)C[C@@H](O)[C@H](C)[C@@H](O[C@@H]2O[C@H](C)[C@@H](O)[C@H](N(C)C)[C@H]2O)[C@@H](CC=O)C[C@@H](C)C(=O)/C=C/C(C)=C/[C@@H]1C	C20760	CC[C@H]1OC(=O)C[C@@H](O)[C@H](C)[C@@H](O[C@@H]2O[C@H](C)[C@@H](O)[C@H](N(C)C)[C@H]2O)[C@@H](CC=O)C[C@@H](C)C(=O)/C=C/C(C)=C/[C@@H]1CO	C12002	R10656
M00773	1	4	CC[C@H]1OC(=O)C[C@@H](O)[C@H](C)[C@@H](O[C@@H]2O[C@H](C)[C@@H](O)[C@H](N(C)C)[C@H]2O)[C@@H](CC=O)C[C@@H](C)C(=O)/C=C/C(C)=C/[C@@H]1CO	C12002	CC[C@H]1OC(=O)C[C@@H](O)[C@H](C)[C@@H](O[C@@H]2O[C@H](C)[C@@H](O)[C@H](N(C)C)[C@H]2O)[C@@H](CC=O)C[C@@H](C)C(=O)/C=C/C(C)=C/[C@@H]1CO[C@@H]1O[C@H](C)[C@@H](O)[C@@H](O)[C@H]1O	C12003	R06451
M00773	1	5	CC[C@H]1OC(=O)C[C@@H](O)[C@H](C)[C@@H](O[C@@H]2O[C@H](C)[C@@H](O)[C@H](N(C)C)[C@H]2O)[C@@H](CC=O)C[C@@H](C)C(=O)/C=C/C(C)=C/[C@@H]1CO[C@@H]1O[C@H](C)[C@@H](O)[C@@H](O)[C@H]1O	C12003	CC[C@H]1OC(=O)C[C@@H](O)[C@H](C)[C@@H](O[C@@H]2O[C@H](C)[C@@H](O[C@H]3C[C@@](C)(O)[C@@H](O)[C@H](C)O3)[C@H](N(C)C)[C@H]2O)[C@@H](CC=O)C[C@@H](C)C(=O)/C=C/C(C)=C/[C@@H]1CO[C@@H]1O[C@H](C)[C@@H](O)[C@@H](O)[C@H]1O	C02400	R06452
M00773	2	1	CC[C@H]1OC(=O)C[C@@H](O)[C@H](C)[C@@H](O[C@@H]2O[C@H](C)[C@@H](O)[C@H](N(C)C)[C@H]2O)[C@@H](CC=O)C[C@@H](C)C(=O)/C=C/C(C)=C/[C@@H]1C	C20760	CC[C@H]1OC(=O)C[C@@H](O)[C@H](C)[C@@H](O[C@@H]2O[C@H](C)[C@@H](O)[C@H](N(C)C)[C@H]2O)[C@@H](CC=O)C[C@@H](C)C(=O)/C=C/C(C)=C/[C@@H]1CO	C12002	R10656
M00773	2	2	CC[C@H]1OC(=O)C[C@@H](O)[C@H](C)[C@@H](O[C@@H]2O[C@H](C)[C@@H](O)[C@H](N(C)C)[C@H]2O)[C@@H](CC=O)C[C@@H](C)C(=O)/C=C/C(C)=C/[C@@H]1CO	C12002	CC[C@H]1OC(=O)C[C@@H](O)[C@H](C)[C@@H](O[C@@H]2O[C@H](C)[C@@H](O)[C@H](N(C)C)[C@H]2O)[C@@H](CC=O)C[C@@H](C)C(=O)/C=C/C(C)=C/[C@@H]1CO[C@@H]1O[C@H](C)[C@@H](O)[C@@H](O)[C@H]1O	C12003	R06451
M00773	2	3	CC[C@H]1OC(=O)C[C@@H](O)[C@H](C)[C@@H](O[C@@H]2O[C@H](C)[C@@H](O)[C@H](N(C)C)[C@H]2O)[C@@H](CC=O)C[C@@H](C)C(=O)/C=C/C(C)=C/[C@@H]1CO[C@@H]1O[C@H](C)[C@@H](O)[C@@H](O)[C@H]1O	C12003	CC[C@H]1OC(=O)C[C@@H](O)[C@H](C)[C@@H](O[C@@H]2O[C@H](C)[C@@H](O[C@H]3C[C@@](C)(O)[C@@H](O)[C@H](C)O3)[C@H](N(C)C)[C@H]2O)[C@@H](CC=O)C[C@@H](C)C(=O)/C=C/C(C)=C/[C@@H]1CO[C@@H]1O[C@H](C)[C@@H](O)[C@@H](O)[C@H]1O	C02400	R06452
M00773	2	4	CC[C@H]1OC(=O)C[C@@H](O)[C@H](C)[C@@H](O[C@@H]2O[C@H](C)[C@@H](O[C@H]3C[C@@](C)(O)[C@@H](O)[C@H](C)O3)[C@H](N(C)C)[C@H]2O)[C@@H](CC=O)C[C@@H](C)C(=O)/C=C/C(C)=C/[C@@H]1CO[C@@H]1O[C@H](C)[C@@H](O)[C@@H](O)[C@H]1O	C02400	CC[C@H]1OC(=O)C[C@@H](O)[C@H](C)[C@@H](O[C@@H]2O[C@H](C)[C@@H](O[C@H]3C[C@@](C)(O)[C@@H](O)[C@H](C)O3)[C@H](N(C)C)[C@H]2O)[C@@H](CC=O)C[C@@H](C)C(=O)/C=C/C(C)=C/[C@@H]1CO[C@@H]1O[C@H](C)[C@@H](O)[C@@H](O)[C@H]1OC	C00744	R02859
M00773	2	5	CC[C@H]1OC(=O)C[C@@H](O)[C@H](C)[C@@H](O[C@@H]2O[C@H](C)[C@@H](O[C@H]3C[C@@](C)(O)[C@@H](O)[C@H](C)O3)[C@H](N(C)C)[C@H]2O)[C@@H](CC=O)C[C@@H](C)C(=O)/C=C/C(C)=C/[C@@H]1CO[C@@H]1O[C@H](C)[C@@H](O)[C@@H](O)[C@H]1OC	C00744	CC[C@H]1OC(=O)C[C@@H](O)[C@H](C)[C@@H](O[C@@H]2O[C@H](C)[C@@H](O[C@H]3C[C@@](C)(O)[C@@H](O)[C@H](C)O3)[C@H](N(C)C)[C@H]2O)[C@@H](CC=O)C[C@@H](C)C(=O)/C=C/C(C)=C/[C@@H]1CO[C@@H]1O[C@H](C)[C@@H](O)[C@@H](OC)[C@H]1OC	C01457	R02858
M00774	1	1	CC[C@H]1OC(=O)[C@H](C)[C@@H](O)[C@H](C)[C@@H](O)[C@@H](C)C[C@@H](C)C(=O)[C@H](C)[C@@H](O)[C@H]1C	C03240	CC[C@H]1OC(=O)[C@H](C)[C@@H](O)[C@H](C)[C@@H](O)[C@](C)(O)C[C@@H](C)C(=O)[C@H](C)[C@@H](O)[C@H]1C	C06635	R05270
M00774	1	2	CC[C@H]1OC(=O)[C@H](C)[C@@H](O)[C@H](C)[C@@H](O)[C@](C)(O)C[C@@H](C)C(=O)[C@H](C)[C@@H](O)[C@H]1C	C06635	CC[C@H]1OC(=O)[C@H](C)[C@@H](O[C@H]2C[C@@](C)(O)[C@@H](O)[C@H](C)O2)[C@H](C)[C@@H](O)[C@](C)(O)C[C@@H](C)C(=O)[C@H](C)[C@@H](O)[C@H]1C	C06630	R05530
M00774	1	3	CC[C@H]1OC(=O)[C@H](C)[C@@H](O[C@H]2C[C@@](C)(O)[C@@H](O)[C@H](C)O2)[C@H](C)[C@@H](O)[C@](C)(O)C[C@@H](C)C(=O)[C@H](C)[C@@H](O)[C@H]1C	C06630	CC[C@H]1OC(=O)[C@H](C)[C@@H](O[C@H]2C[C@@](C)(O)[C@@H](O)[C@H](C)O2)[C@H](C)[C@@H](O[C@@H]2O[C@H](C)C[C@H](N(C)C)[C@H]2O)[C@](C)(O)C[C@@H](C)C(=O)[C@H](C)[C@@H](O)[C@H]1C	C06633	R05531
M00774	1	4	CC[C@H]1OC(=O)[C@H](C)[C@@H](O[C@H]2C[C@@](C)(O)[C@@H](O)[C@H](C)O2)[C@H](C)[C@@H](O[C@@H]2O[C@H](C)C[C@H](N(C)C)[C@H]2O)[C@](C)(O)C[C@@H](C)C(=O)[C@H](C)[C@@H](O)[C@H]1C	C06633	CC[C@H]1OC(=O)[C@H](C)[C@@H](O[C@H]2C[C@@](C)(OC)[C@@H](O)[C@H](C)O2)[C@H](C)[C@@H](O[C@@H]2O[C@H](C)C[C@H](N(C)C)[C@H]2O)[C@](C)(O)C[C@@H](C)C(=O)[C@H](C)[C@@H](O)[C@H]1C	C06653	R05532
M00775	1	1	C[C@H]1C[C@@H](C)C(=O)[C@H](C)[C@@H](O)[C@@H](C)[C@@H](C)OC(=O)[C@H](C)[C@@H](O)[C@H](C)[C@H]1O	C11989	C[C@H]1C[C@@]2(CO2)C(=O)[C@H](C)[C@@H](O)[C@@H](C)[C@@H](C)OC(=O)[C@H](C)[C@@H](O)[C@H](C)[C@H]1O	C11990	R06454
M00775	1	2	C[C@H]1C[C@@]2(CO2)C(=O)[C@H](C)[C@@H](O)[C@@H](C)[C@@H](C)OC(=O)[C@H](C)[C@@H](O)[C@H](C)[C@H]1O	C11990	C[C@H]1C[C@@]2(CO2)C(=O)[C@H](C)[C@@H](O)[C@@H](C)[C@@H](C)OC(=O)[C@H](C)[C@@H](O[C@H]2C[C@H](O)[C@@H](O)[C@H](C)O2)[C@H](C)[C@H]1O	C11991	R06455
M00775	1	3	C[C@H]1C[C@@]2(CO2)C(=O)[C@H](C)[C@@H](O)[C@@H](C)[C@@H](C)OC(=O)[C@H](C)[C@@H](O[C@H]2C[C@H](O)[C@@H](O)[C@H](C)O2)[C@H](C)[C@H]1O	C11991	CO[C@H]1C[C@H](O[C@@H]2[C@@H](C)C(=O)O[C@H](C)[C@H](C)[C@H](O)[C@@H](C)C(=O)[C@]3(CO3)C[C@H](C)[C@H](O)[C@H]2C)O[C@@H](C)[C@@H]1O	C11992	R06456
M00775	1	4	CO[C@H]1C[C@H](O[C@@H]2[C@@H](C)C(=O)O[C@H](C)[C@H](C)[C@H](O)[C@@H](C)C(=O)[C@]3(CO3)C[C@H](C)[C@H](O)[C@H]2C)O[C@@H](C)[C@@H]1O	C11992	CO[C@H]1C[C@H](O[C@@H]2[C@@H](C)C(=O)O[C@H](C)[C@H](C)[C@H](O)[C@@H](C)C(=O)[C@]3(CO3)C[C@H](C)[C@H](O[C@@H]3O[C@H](C)C[C@H](N(C)C)[C@H]3O)[C@H]2C)O[C@@H](C)[C@@H]1O	C01946	R06457
M00776	1	1	CC[C@H]1OC(=O)[C@H](C)[C@@H](O)[C@@H](C)C[C@@H](C)C(=O)/C=C/[C@H]1C	C11993	CC[C@H]1OC(=O)[C@H](C)[C@@H](O[C@@H]2O[C@H](C)C[C@H](N(C)C)[C@H]2O)[C@@H](C)C[C@@H](C)C(=O)/C=C/[C@H]1C	C11994	R06460
M00776	1	2	CC[C@H]1OC(=O)[C@H](C)[C@@H](O[C@@H]2O[C@H](C)C[C@H](N(C)C)[C@H]2O)[C@@H](C)C[C@@H](C)C(=O)/C=C/[C@H]1C	C11994	CC[C@H]1OC(=O)[C@H](C)[C@@H](O[C@@H]2O[C@H](C)C[C@H](N(C)C)[C@H]2O)[C@@H](C)C[C@@H](C)C(=O)/C=C/[C@]1(C)O	C11996	R06463
M00779	1	1	CC(=O)C1=C(C[C@H](O)CC(=O)O)Cc2cccc(O)c2C1=O	C18354	CC1(O)O[C@H](CC(=O)O)CC2=C1C(=O)c1c(O)cccc1C2	C18356	R09307
M00779	1	2	CC1(O)O[C@H](CC(=O)O)CC2=C1C(=O)c1c(O)cccc1C2	C18356	CC1=C2C(=O)c3c(O)cccc3C=C2C[C@@H](CC(=O)O)O1	C12434	R09308
M00779	1	3	CC1=C2C(=O)c3c(O)cccc3C=C2C[C@@H](CC(=O)O)O1	C12434	C[C@H]1O[C@H](CC(=O)O)CC2=C1C(=O)c1c(O)cccc1C2	C12435	R06695
M00779	1	4	C[C@H]1O[C@H](CC(=O)O)CC2=C1C(=O)c1c(O)cccc1C2	C12435	C[C@H]1O[C@H](CC(=O)O)CC2=C1C(=O)c1c(O)cccc1C2=O	C12436	R05705;R06696;R09314
M00780	1	1	NC(=O)c1c(O)cc2cc3cc4cccc(O)c4c(O)c3c(O)c2c1O	C18295	Cc1c2cccc(O)c2c(O)c2c(O)c3c(O)c(C(N)=O)c(O)cc3cc12	C06629	R09189
M00780	1	2	Cc1c2cccc(O)c2c(O)c2c(O)c3c(O)c(C(N)=O)c(O)cc3cc12	C06629	Cc1c2cccc(O)c2c(O)c2c(O)c3c(O)c(C(N)=O)c(O)c(O)c3cc12	C06628	R05463
M00780	1	3	Cc1c2cccc(O)c2c(O)c2c(O)c3c(O)c(C(N)=O)c(O)c(O)c3cc12	C06628	Cc1c2c(c(O)c3c(O)cccc13)C(=O)[C@]1(O)C(=O)C(C(N)=O)=C(O)C(=O)[C@@H]1C2	C06627	R05462
M00780	2	1	Cc1c2c(c(O)c3c(O)cccc13)C(=O)[C@]1(O)C(=O)C(C(N)=O)=C(O)[C@@H](N)[C@@H]1C2	C06654	Cc1c2c(c(O)c3c(O)cccc13)C(=O)[C@]1(O)C(=O)C(C(N)=O)=C(O)[C@@H](N(C)C)[C@@H]1C2	C02811	R09191
M00780	2	2	Cc1c2c(c(O)c3c(O)cccc13)C(=O)[C@]1(O)C(=O)C(C(N)=O)=C(O)[C@@H](N(C)C)[C@@H]1C2	C02811	CN(C)[C@@H]1C(O)=C(C(N)=O)C(=O)[C@@]2(O)C(=O)C3=C(C[C@@H]12)[C@](C)(O)c1cccc(O)c1C3=O	C03206	R04060
M00780	2	3	CN(C)[C@@H]1C(O)=C(C(N)=O)C(=O)[C@@]2(O)C(=O)C3=C(C[C@@H]12)[C@](C)(O)c1cccc(O)c1C3=O	C03206	CN(C)[C@@H]1C(O)=C(C(N)=O)C(=O)[C@@]2(O)C(=O)C3=C([C@H](O)[C@@H]12)[C@](C)(O)c1cccc(O)c1C3=O	C18296	R09198
M00780	2	4	CN(C)[C@@H]1C(O)=C(C(N)=O)C(=O)[C@@]2(O)C(=O)C3=C([C@H](O)[C@@H]12)[C@](C)(O)c1cccc(O)c1C3=O	C18296	CN(C)[C@@H]1C(O)=C(C(N)=O)C(=O)[C@@]2(O)C(O)=C3C(=O)c4c(O)cccc4[C@@](C)(O)[C@H]3[C@H](O)[C@@H]12	C06624	R09192
M00782	1	1	CC(=O)C1=C(O)[C@@H](O)[C@@H]2Cc3cc4cc(O)cc(O)c4c(O)c3C(=O)[C@]2(O)C1=O	C12382	CO[C@@H]1C(O)=C(C(C)=O)C(=O)[C@@]2(O)C(=O)c3c(cc4cc(O)cc(O)c4c3O)C[C@@H]12	C12383	R06715
M00782	1	2	CO[C@@H]1C(O)=C(C(C)=O)C(=O)[C@@]2(O)C(=O)c3c(cc4cc(O)cc(O)c4c3O)C[C@@H]12	C12383	CO[C@@H]1C(O)=C(C(C)=O)C(=O)[C@@]2(O[C@H]3C[C@@H](O)[C@H](O)[C@@H](C)O3)C(=O)c3c(cc4cc(O)cc(O)c4c3O)C[C@@H]12	C12384	R06716
M00782	1	3	CO[C@@H]1C(O)=C(C(C)=O)C(=O)[C@@]2(O[C@H]3C[C@@H](O)[C@H](O)[C@@H](C)O3)C(=O)c3c(cc4cc(O)cc(O)c4c3O)C[C@@H]12	C12384	CO[C@@H]1C(O)=C(C(C)=O)C(=O)[C@@]2(O[C@H]3C[C@@H](O[C@H]4C[C@@H](O)[C@@H](O)[C@@H](C)O4)[C@H](O)[C@@H](C)O3)C(=O)c3c(cc4cc(O)cc(O)c4c3O)C[C@@H]12	C12385	R06717
M00782	1	4	CO[C@@H]1C(O)=C(C(C)=O)C(=O)[C@@]2(O[C@H]3C[C@@H](O[C@H]4C[C@@H](O)[C@@H](O)[C@@H](C)O4)[C@H](O)[C@@H](C)O3)C(=O)c3c(cc4cc(O)cc(O)c4c3O)C[C@@H]12	C12385	CO[C@@H]1C(O)=C(C(C)=O)C(=O)[C@@]2(O[C@H]3C[C@@H](O[C@H]4C[C@@H](O[C@H]5C[C@](C)(O)[C@H](O)[C@@H](C)O5)[C@@H](O)[C@@H](C)O4)[C@H](O)[C@@H](C)O3)C(=O)c3c(cc4cc(O)cc(O)c4c3O)C[C@@H]12	C12386	R06718
M00782	1	5	CO[C@@H]1C(O)=C(C(C)=O)C(=O)[C@@]2(O[C@H]3C[C@@H](O[C@H]4C[C@@H](O[C@H]5C[C@](C)(O)[C@H](O)[C@@H](C)O5)[C@@H](O)[C@@H](C)O4)[C@H](O)[C@@H](C)O3)C(=O)c3c(cc4cc(O)cc(O)c4c3O)C[C@@H]12	C12386	CO[C@@H]1C(O)=C(C(C)=O)C(=O)[C@@]2(O[C@H]3C[C@@H](O[C@H]4C[C@@H](O[C@H]5C[C@](C)(O)[C@H](O)[C@@H](C)O5)[C@@H](O)[C@@H](C)O4)[C@H](O)[C@@H](C)O3)C(=O)c3c(cc4cc(O)c(C)c(O)c4c3O)C[C@@H]12	C12387	R06719
M00782	2	1	CO[C@@H]1C(O)=C(C(C)=O)C(=O)[C@@]2(O[C@H]3C[C@@H](O)[C@H](O)[C@@H](C)O3)C(=O)c3c(cc4cc(O)cc(O)c4c3O)C[C@@H]12	C12384	CO[C@@H]1C(O)=C(C(C)=O)C(=O)[C@@]2(O[C@H]3C[C@@H](O[C@H]4C[C@@H](O)[C@@H](O)[C@@H](C)O4)[C@H](O)[C@@H](C)O3)C(=O)c3c(cc4cc(O)cc(O)c4c3O)C[C@@H]12	C12385	R06717
M00782	2	2	CO[C@@H]1C(O)=C(C(C)=O)C(=O)[C@@]2(O[C@H]3C[C@@H](O[C@H]4C[C@@H](O)[C@@H](O)[C@@H](C)O4)[C@H](O)[C@@H](C)O3)C(=O)c3c(cc4cc(O)cc(O)c4c3O)C[C@@H]12	C12385	CO[C@@H]1C(O)=C(C(C)=O)C(=O)[C@@]2(O[C@H]3C[C@@H](O[C@H]4C[C@@H](O[C@H]5C[C@](C)(O)[C@H](O)[C@@H](C)O5)[C@@H](O)[C@@H](C)O4)[C@H](O)[C@@H](C)O3)C(=O)c3c(cc4cc(O)cc(O)c4c3O)C[C@@H]12	C12386	R06718
M00782	2	3	CO[C@@H]1C(O)=C(C(C)=O)C(=O)[C@@]2(O[C@H]3C[C@@H](O[C@H]4C[C@@H](O[C@H]5C[C@](C)(O)[C@H](O)[C@@H](C)O5)[C@@H](O)[C@@H](C)O4)[C@H](O)[C@@H](C)O3)C(=O)c3c(cc4cc(O)cc(O)c4c3O)C[C@@H]12	C12386	CO[C@@H]1C(O)=C(C(C)=O)C(=O)[C@@]2(O[C@H]3C[C@@H](O[C@H]4C[C@@H](O[C@H]5C[C@](C)(O)[C@H](O)[C@@H](C)O5)[C@@H](O)[C@@H](C)O4)[C@H](O)[C@@H](C)O3)C(=O)c3c(cc4cc(O)c(C)c(O)c4c3O)C[C@@H]12	C12387	R06719
M00782	2	4	CO[C@@H]1C(O)=C(C(C)=O)C(=O)[C@@]2(O[C@H]3C[C@@H](O[C@H]4C[C@@H](O[C@H]5C[C@](C)(O)[C@H](O)[C@@H](C)O5)[C@@H](O)[C@@H](C)O4)[C@H](O)[C@@H](C)O3)C(=O)c3c(cc4cc(O)c(C)c(O)c4c3O)C[C@@H]12	C12387	CO[C@@H]1C(O)=C(C(C)=O)C(=O)[C@@]2(O[C@H]3C[C@@H](O[C@H]4C[C@@H](O[C@H]5C[C@](C)(O)[C@H](O)[C@@H](C)O5)[C@@H](O)[C@@H](C)O4)[C@H](O)[C@@H](C)O3)C(=O)c3c(cc4cc(O[C@H]5C[C@@H](O)[C@H](O)[C@@H](C)O5)c(C)c(O)c4c3O)C[C@@H]12	C18710	R09351
M00782	2	5	CO[C@@H]1C(O)=C(C(C)=O)C(=O)[C@@]2(O[C@H]3C[C@@H](O[C@H]4C[C@@H](O[C@H]5C[C@](C)(O)[C@H](O)[C@@H](C)O5)[C@@H](O)[C@@H](C)O4)[C@H](O)[C@@H](C)O3)C(=O)c3c(cc4cc(O[C@H]5C[C@@H](O)[C@H](O)[C@@H](C)O5)c(C)c(O)c4c3O)C[C@@H]12	C18710	CO[C@@H]1C(O)=C(C(C)=O)C(=O)[C@@]2(O[C@H]3C[C@@H](O[C@H]4C[C@@H](O[C@H]5C[C@](C)(O)[C@H](O)[C@@H](C)O5)[C@@H](O)[C@@H](C)O4)[C@H](O)[C@@H](C)O3)C(=O)c3c(cc4cc(O[C@H]5C[C@@H](O[C@H]6C[C@@H](O)[C@H](O)[C@@H](C)O6)[C@H](O)[C@@H](C)O5)c(C)c(O)c4c3O)C[C@@H]12	C12388	R09352
M00782	3	1	CO[C@H](C(=O)[C@@H](O)C(C)=O)[C@@H]1Cc2cc3cc(O[C@H]4C[C@@H](O[C@H]5C[C@@H](O)[C@H](O)[C@@H](C)O5)[C@H](O)[C@@H](C)O4)c(C)c(O)c3c(O)c2C(=O)[C@H]1O[C@H]1C[C@@H](O[C@H]2C[C@@H](O[C@H]3C[C@](C)(O)[C@H](O)[C@@H](C)O3)[C@@H](O)[C@@H](C)O2)[C@H](O)[C@@H](C)O1	C18711	CO[C@H](C(=O)[C@@H](O)[C@@H](C)O)[C@@H]1Cc2cc3cc(O[C@H]4C[C@@H](O[C@H]5C[C@@H](O)[C@H](O)[C@@H](C)O5)[C@H](O)[C@@H](C)O4)c(C)c(O)c3c(O)c2C(=O)[C@H]1O[C@H]1C[C@@H](O[C@H]2C[C@@H](O[C@H]3C[C@](C)(O)[C@H](O)[C@@H](C)O3)[C@@H](O)[C@@H](C)O2)[C@H](O)[C@@H](C)O1	C12389	R09354
M00783	1	1	CC(=O)c1c(/C=C(/O)CC(=O)O)cc2cc3cc(O)cc(O)c3c(O)c2c1O	C12366	Cc1c(C(=O)O)c(O)cc2cc3c(c(O)c12)C(=O)c1c(O)cc(O)cc1C3	C12367	R06699
M00783	1	2	Cc1c(C(=O)O)c(O)cc2cc3c(c(O)c12)C(=O)c1c(O)cc(O)cc1C3	C12367	Cc1c(C(=O)O)c(O)cc2cc3c(c(O)c12)C(=O)c1c(O)cc(O)cc1C3=O	C12368	R06700
M00783	2	1	COc1cc(O)c2c(c1)C(=O)c1cc3cc(O)c(C(=O)O)c(C)c3c(O)c1C2=O	C12369	COC(=O)c1c(O)cc2cc3c(c(O)c2c1C)C(=O)c1c(O)cc(OC)cc1C3=O	C12378	R06713
M00783	2	2	COC(=O)c1c(O)cc2cc3c(c(O)c2c1C)C(=O)c1c(O)cc(OC)cc1C3=O	C12378	COC(=O)c1c(O)cc2cc3c(c(O)c2c1C)C(=O)[C@]1(O)C(=O)C=C(OC)[C@@H](O)[C@]1(O)C3=O	C12379	R10954
M00784	1	1	COC(=O)c1c(O)cc2cc3c(c(O)c2c1C)C(=O)[C@]1(O)C(=O)C=C(OC)[C@@H](O)[C@]1(O)C3=O	C12379	COC(=O)c1c(O[C@@H]2O[C@@H](C)[C@H](O)[C@@H](O)[C@H]2O)cc2cc3c(c(O)c2c1C)C(=O)[C@]1(O)C(=O)C=C(OC)[C@@H](O)[C@]1(O)C3=O	C20974	R10955
M00784	1	2	COC(=O)c1c(O[C@@H]2O[C@@H](C)[C@H](O)[C@@H](O)[C@H]2O)cc2cc3c(c(O)c2c1C)C(=O)[C@]1(O)C(=O)C=C(OC)[C@@H](O)[C@]1(O)C3=O	C20974	COC(=O)c1c(O[C@@H]2O[C@@H](C)[C@H](O)[C@@H](O)[C@H]2OC)cc2cc3c(c(O)c2c1C)C(=O)[C@]1(O)C(=O)C=C(OC)[C@@H](O)[C@]1(O)C3=O	C20975	R10956
M00784	1	3	COC(=O)c1c(O[C@@H]2O[C@@H](C)[C@H](O)[C@@H](O)[C@H]2OC)cc2cc3c(c(O)c2c1C)C(=O)[C@]1(O)C(=O)C=C(OC)[C@@H](O)[C@]1(O)C3=O	C20975	COC(=O)c1c(O[C@@H]2O[C@@H](C)[C@H](O)[C@@H](OC)[C@H]2OC)cc2cc3c(c(O)c2c1C)C(=O)[C@]1(O)C(=O)C=C(OC)[C@@H](O)[C@]1(O)C3=O	C20976	R10957
M00784	1	4	COC(=O)c1c(O[C@@H]2O[C@@H](C)[C@H](O)[C@@H](OC)[C@H]2OC)cc2cc3c(c(O)c2c1C)C(=O)[C@]1(O)C(=O)C=C(OC)[C@@H](O)[C@]1(O)C3=O	C20976	COC(=O)c1c(O[C@@H]2O[C@@H](C)[C@H](OC)[C@@H](OC)[C@H]2OC)cc2cc3c(c(O)c2c1C)C(=O)[C@]1(O)C(=O)C=C(OC)[C@@H](O)[C@]1(O)C3=O	C20977	R10958
M00784	1	5	COC(=O)c1c(O[C@@H]2O[C@@H](C)[C@H](OC)[C@@H](OC)[C@H]2OC)cc2cc3c(c(O)c2c1C)C(=O)[C@]1(O)C(=O)C=C(OC)[C@@H](O)[C@]1(O)C3=O	C20977	COC(=O)c1c(O[C@@H]2O[C@@H](C)[C@H](OC)[C@@H](OC)[C@H]2OC)cc2cc3c(c(O)c2c1C)C(=O)[C@]1(OC)C(=O)C=C(OC)[C@@H](O)[C@]1(O)C3=O	C12381	R10959
M00785	1	1	N/C(=N/O)NCCC[C@H](N)C(=O)O	C05933	NC(=O)NO	C07044	R10466
M00785	1	2	NC(=O)NO	C07044	NC(=O)NOC[C@H](N)C(=O)O	C20639	R10461
M00785	1	3	NC(=O)NOC[C@H](N)C(=O)O	C20639	NC(=O)NOC[C@@H](N)C(=O)O	C20651	R10488
M00785	1	4	NC(=O)NOC[C@@H](N)C(=O)O	C20651	N[C@@H]1CONC1=O	C08057	R10470
M00786	1	1	N[C@@H](Cc1c[nH]c2ccccc12)C(=O)O	C00078	O=C1N[C@@H](Cc2c[nH]c3ccccc23)C(=O)N2CCC[C@@H]12	C20563	R10661
M00786	1	2	O=C1N[C@@H](Cc2c[nH]c3ccccc23)C(=O)N2CCC[C@@H]12	C20563	CC(C)=CCc1[nH]c2ccccc2c1C[C@@H]1NC(=O)[C@@H]2CCCN2C1=O	C20512	R10340
M00786	1	3	CC(C)=CCc1[nH]c2ccccc2c1C[C@@H]1NC(=O)[C@@H]2CCCN2C1=O	C20512	CC(C)=CCc1[nH]c2cc(O)ccc2c1C[C@@H]1NC(=O)[C@@H]2CCCN2C1=O	C20513	R10321
M00786	1	4	CC(C)=CCc1[nH]c2cc(O)ccc2c1C[C@@H]1NC(=O)[C@@H]2CCCN2C1=O	C20513	COc1ccc2c(C[C@@H]3NC(=O)[C@@H]4CCCN4C3=O)c(CC=C(C)C)[nH]c2c1	C20607	R10588
M00786	1	5	COc1ccc2c(C[C@@H]3NC(=O)[C@@H]4CCCN4C3=O)c(CC=C(C)C)[nH]c2c1	C20607	COc1ccc2c3c([nH]c2c1)[C@H](C=C(C)C)N1C(=O)[C@@H]2CCCN2C(=O)[C@@H]1C3	C20604	R10416
M00786	2	1	COc1ccc2c(C[C@@H]3NC(=O)[C@@H]4CCCN4C3=O)c(CC=C(C)C)[nH]c2c1	C20607	COc1ccc2c3c([nH]c2c1)[C@H](C=C(C)C)N1C(=O)[C@@H]2CCCN2C(=O)[C@@H]1C3	C20604	R10416
M00786	2	2	COc1ccc2c3c([nH]c2c1)[C@H](C=C(C)C)N1C(=O)[C@@H]2CCCN2C(=O)[C@@H]1C3	C20604	COc1ccc2c3c([nH]c2c1)[C@H](C=C(C)C)N1C(=O)[C@@H]2CCCN2C(=O)[C@]1(O)[C@H]3O	C20605	R10414
M00786	2	3	COc1ccc2c3c([nH]c2c1)[C@H](C=C(C)C)N1C(=O)[C@@H]2CCCN2C(=O)[C@]1(O)[C@H]3O	C20605	COc1ccc2c3c(n(CC=C(C)C)c2c1)[C@H](C=C(C)C)N1C(=O)[C@@H]2CCCN2C(=O)[C@]1(O)[C@H]3O	C20630	R10457
M00786	2	4	COc1ccc2c3c(n(CC=C(C)C)c2c1)[C@H](C=C(C)C)N1C(=O)[C@@H]2CCCN2C(=O)[C@]1(O)[C@H]3O	C20630	COc1ccc2c3c4n(c2c1)[C@@H](C=C(C)C)OOC(C)(C)C[C@@H]4N1C(=O)[C@@H]2CCCN2C(=O)[C@]1(O)[C@H]3O	C20045	R10445
M00786	2	5	COc1ccc2c3c4n(c2c1)[C@@H](C=C(C)C)OOC(C)(C)C[C@@H]4N1C(=O)[C@@H]2CCCN2C(=O)[C@]1(O)[C@H]3O	C20045	COc1ccc2c3c4n(c2c1)[C@@H](C=C(C)C)OOC(C)(C)C[C@@H]4N1C(=O)[C@@H]2CCCN2C(=O)[C@]1(O)[C@H]3OCC=C(C)C	C20564	R10341
M00787	1	1	O=C(O)C(=O)C[C@]1(C(=O)O)C=C[C@@H](O)C=C1	C00254	O=C(O)C(=O)CC1=CC[C@@H](O)C=C1	C20953	R10934
M00787	1	2	O=C(O)C(=O)CC1=CC[C@@H](O)C=C1	C20953	O=C(O)C(=O)/C=C1/C=C[C@H](O)CC1	C21085	R11065
M00787	2	1	O=C(O)C(=O)/C=C1\CC[C@@H](O)[C@@H]2O[C@H]12	C21086	O=C(O)C(=O)C[C@@H]1CC[C@@H](O)[C@@H]2O[C@H]12	C21087	R11067
M00787	2	2	O=C(O)C(=O)C[C@@H]1CC[C@@H](O)[C@@H]2O[C@H]12	C21087	N[C@@H](C[C@@H]1CC[C@@H](O)[C@@H]2O[C@H]12)C(=O)O	C20940	R11068
M00787	2	3	N[C@@H](C[C@@H]1CC[C@@H](O)[C@@H]2O[C@H]12)C(=O)O	C20940	N[C@@H](C[C@@H]1CCC(=O)[C@@H]2O[C@H]12)C(=O)O	C20941	R10917
M00787	2	4	N[C@@H](C[C@@H]1CCC(=O)[C@@H]2O[C@H]12)C(=O)O	C20941	C[C@H](N)C(=O)N[C@@H](C[C@@H]1CCC(=O)[C@@H]2O[C@H]12)C(=O)O	C20942	R11064
M00788	1	1	CC(C)=CCC/C(C)=C/CC/C(C)=C/CC/C(C)=C/COP(=O)(O)OP(=O)(O)O	C00353	CC1=CCC[C@@H]2[C@]1(C)CC[C@@H](C)[C@@]2(C)CC/C(C)=C/COP(=O)(O)OP(=O)(O)O	C19815	R09714
M00788	1	2	CC1=CCC[C@@H]2[C@]1(C)CC[C@@H](C)[C@@]2(C)CC/C(C)=C/COP(=O)(O)OP(=O)(O)O	C19815	C=CC(=C)CC[C@@]1(C)[C@@H]2CCC=C(C)[C@@]2(C)CC[C@H]1C	C19814	R09684
M00789	1	1	N[C@@H](Cc1c[nH]c2ccccc12)C(=O)O	C00078	N[C@@H](Cc1c[nH]c2c(Cl)cccc12)C(=O)O	C19687	R09570
M00789	1	2	N[C@@H](Cc1c[nH]c2c(Cl)cccc12)C(=O)O	C19687	N=C(Cc1c[nH]c2c(Cl)cccc12)C(=O)O	C19688	R09560
M00789	1	3	N=C(Cc1c[nH]c2c(Cl)cccc12)C(=O)O	C19688	O=C(O)c1[nH]c(C(=O)O)c(-c2c[nH]c3c(Cl)cccc23)c1-c1c[nH]c2c(Cl)cccc12	C19698	R09566
M00789	2	1	O=C1NC(=O)c2c1c1c3cccc(Cl)c3[nH]c1c1[nH]c3c(Cl)cccc3c21	C19699	O=C1NC(=O)c2c1c1c3cccc(Cl)c3[nH]c1c1c2c2cccc(Cl)c2n1[C@@H]1O[C@H](CO)[C@@H](O)[C@H](O)[C@H]1O	C19700	R09568
M00789	2	2	O=C1NC(=O)c2c1c1c3cccc(Cl)c3[nH]c1c1c2c2cccc(Cl)c2n1[C@@H]1O[C@H](CO)[C@@H](O)[C@H](O)[C@H]1O	C19700	CO[C@@H]1[C@@H](CO)O[C@@H](n2c3c(Cl)cccc3c3c4c(c5c6cccc(Cl)c6[nH]c5c32)C(=O)NC4=O)[C@H](O)[C@H]1O	C19701	R09569
M00790	1	1	N[C@@H](Cc1c[nH]c2ccccc12)C(=O)O	C00078	N[C@@H](Cc1c[nH]c2c(Cl)cccc12)C(=O)O	C19687	R09570
M00790	1	2	N[C@@H](Cc1c[nH]c2c(Cl)cccc12)C(=O)O	C19687	Nc1c(Cl)cccc1-c1cc[nH]c1	C21110	R11105
M00790	1	3	Nc1c(Cl)cccc1-c1cc[nH]c1	C21110	Nc1c(Cl)cccc1-c1c[nH]cc1Cl	C21109	R11106
M00790	1	4	Nc1c(Cl)cccc1-c1c[nH]cc1Cl	C21109	O=[N+]([O-])c1c(Cl)cccc1-c1c[nH]cc1Cl	C12491	R11107
M00793	1	1	O=P(O)(O)O[C@H]1O[C@H](CO)[C@@H](O)[C@H](O)[C@H]1O	C00103	Cc1cn([C@H]2C[C@H](O)[C@@H](COP(=O)(O)OP(=O)(O)O[C@H]3O[C@H](CO)[C@@H](O)[C@H](O)[C@H]3O)O2)c(=O)[nH]c1=O	C00842	R02328
M00793	1	2	Cc1cn([C@H]2C[C@H](O)[C@@H](COP(=O)(O)OP(=O)(O)O[C@H]3O[C@H](CO)[C@@H](O)[C@H](O)[C@H]3O)O2)c(=O)[nH]c1=O	C00842	Cc1cn([C@H]2C[C@H](O)[C@@H](COP(=O)(O)OP(=O)(O)O[C@H]3O[C@H](C)C(=O)[C@H](O)[C@H]3O)O2)c(=O)[nH]c1=O	C11907	R06513
M00793	1	3	Cc1cn([C@H]2C[C@H](O)[C@@H](COP(=O)(O)OP(=O)(O)O[C@H]3O[C@H](C)C(=O)[C@H](O)[C@H]3O)O2)c(=O)[nH]c1=O	C11907	Cc1cn([C@H]2C[C@H](O)[C@@H](COP(=O)(O)OP(=O)(O)O[C@H]3O[C@@H](C)C(=O)[C@@H](O)[C@H]3O)O2)c(=O)[nH]c1=O	C00688	R06514
M00793	1	4	Cc1cn([C@H]2C[C@H](O)[C@@H](COP(=O)(O)OP(=O)(O)O[C@H]3O[C@@H](C)C(=O)[C@@H](O)[C@H]3O)O2)c(=O)[nH]c1=O	C00688	Cc1cn([C@H]2C[C@H](O)[C@@H](COP(=O)(O)OP(=O)(O)O[C@H]3O[C@@H](C)[C@H](O)[C@@H](O)[C@H]3O)O2)c(=O)[nH]c1=O	C03319	R02777
M00794	1	1	Cc1cn([C@H]2C[C@H](O)[C@@H](COP(=O)(O)OP(=O)(O)O[C@H]3O[C@H](C)C(=O)[C@H](O)[C@H]3O)O2)c(=O)[nH]c1=O	C11907	Cc1cn([C@H]2C[C@H](O)[C@@H](COP(=O)(O)OP(=O)(O)O[C@H]3O[C@H](C)C(=O)[C@@H](O)[C@H]3O)O2)c(=O)[nH]c1=O	C11926	R06437
M00794	1	2	Cc1cn([C@H]2C[C@H](O)[C@@H](COP(=O)(O)OP(=O)(O)O[C@H]3O[C@H](C)C(=O)[C@@H](O)[C@H]3O)O2)c(=O)[nH]c1=O	C11926	Cc1cn([C@H]2C[C@H](O)[C@@H](COP(=O)(O)OP(=O)(O)O[C@H]3O[C@H](C)[C@@H](O)[C@@H](O)[C@H]3O)O2)c(=O)[nH]c1=O	C11912	R06438;R10573
M00795	1	1	Cc1cn([C@H]2C[C@H](O)[C@@H](COP(=O)(O)OP(=O)(O)O[C@H]3O[C@H](C)C(=O)[C@H](O)[C@H]3O)O2)c(=O)[nH]c1=O	C11907	Cc1cn([C@H]2C[C@H](O)[C@@H](COP(=O)(O)OP(=O)(O)O[C@H]3O[C@H](C)C(=O)[C@@H](O)[C@H]3O)O2)c(=O)[nH]c1=O	C11926	R06437
M00795	1	2	Cc1cn([C@H]2C[C@H](O)[C@@H](COP(=O)(O)OP(=O)(O)O[C@H]3O[C@H](C)C(=O)[C@@H](O)[C@H]3O)O2)c(=O)[nH]c1=O	C11926	Cc1cn([C@H]2C[C@H](O)[C@@H](COP(=O)(O)OP(=O)(O)O[C@H]3OC(C)(C)C(=O)[C@@H](O)[C@H]3O)O2)c(=O)[nH]c1=O	C11460	R11020
M00795	1	3	Cc1cn([C@H]2C[C@H](O)[C@@H](COP(=O)(O)OP(=O)(O)O[C@H]3OC(C)(C)C(=O)[C@@H](O)[C@H]3O)O2)c(=O)[nH]c1=O	C11460	Cc1cn([C@H]2C[C@H](O)[C@@H](COP(=O)(O)OP(=O)(O)O[C@H]3OC(C)(C)[C@H](O)[C@@H](O)[C@H]3O)O2)c(=O)[nH]c1=O	C12481	R10459
M00796	1	1	Cc1cn([C@H]2C[C@H](O)[C@@H](COP(=O)(O)OP(=O)(O)O[C@H]3O[C@H](C)C(=O)[C@H](O)[C@H]3O)O2)c(=O)[nH]c1=O	C11907	Cc1cn([C@H]2C[C@H](O)[C@@H](COP(=O)(O)OP(=O)(O)O[C@H]3O[C@H](C)[C@@H](O)C(=O)[C@H]3O)O2)c(=O)[nH]c1=O	C11908	R06424
M00796	1	2	Cc1cn([C@H]2C[C@H](O)[C@@H](COP(=O)(O)OP(=O)(O)O[C@H]3O[C@H](C)[C@@H](O)C(=O)[C@H]3O)O2)c(=O)[nH]c1=O	C11908	Cc1cn([C@H]2C[C@H](O)[C@@H](COP(=O)(O)OP(=O)(O)O[C@H]3O[C@H](C)[C@@H](O)[C@H](N)[C@H]3O)O2)c(=O)[nH]c1=O	C11925	R06423
M00796	1	3	Cc1cn([C@H]2C[C@H](O)[C@@H](COP(=O)(O)OP(=O)(O)O[C@H]3O[C@H](C)[C@@H](O)[C@H](N)[C@H]3O)O2)c(=O)[nH]c1=O	C11925	Cc1cn([C@H]2C[C@H](O)[C@@H](COP(=O)(O)OP(=O)(O)O[C@H]3O[C@H](C)[C@@H](O)[C@H](N(C)C)[C@H]3O)O2)c(=O)[nH]c1=O	C11933	R06439
M00797	1	1	Cc1cn([C@H]2C[C@H](O)[C@@H](COP(=O)(O)OP(=O)(O)O[C@H]3O[C@H](C)C(=O)[C@H](O)[C@H]3O)O2)c(=O)[nH]c1=O	C11907	Cc1cn([C@H]2C[C@H](O)[C@@H](COP(=O)(O)OP(=O)(O)O[C@H]3O[C@H](C)[C@@H](N)[C@H](O)[C@H]3O)O2)c(=O)[nH]c1=O	C04268	R02773
M00797	1	2	Cc1cn([C@H]2C[C@H](O)[C@@H](COP(=O)(O)OP(=O)(O)O[C@H]3O[C@H](C)[C@@H](N)[C@H](O)[C@H]3O)O2)c(=O)[nH]c1=O	C04268	Cc1cn([C@H]2C[C@H](O)[C@@H](COP(=O)(O)OP(=O)(O)O[C@H]3O[C@H](C)CC(=O)[C@H]3O)O2)c(=O)[nH]c1=O	C11909	R08583
M00797	1	3	Cc1cn([C@H]2C[C@H](O)[C@@H](COP(=O)(O)OP(=O)(O)O[C@H]3O[C@H](C)CC(=O)[C@H]3O)O2)c(=O)[nH]c1=O	C11909	Cc1cn([C@H]2C[C@H](O)[C@@H](COP(=O)(O)OP(=O)(O)O[C@H]3O[C@H](C)C[C@H](N)[C@H]3O)O2)c(=O)[nH]c1=O	C11910	R06426
M00797	1	4	Cc1cn([C@H]2C[C@H](O)[C@@H](COP(=O)(O)OP(=O)(O)O[C@H]3O[C@H](C)C[C@H](N)[C@H]3O)O2)c(=O)[nH]c1=O	C11910	Cc1cn([C@H]2C[C@H](O)[C@@H](COP(=O)(O)OP(=O)(O)O[C@H]3O[C@H](C)C[C@H](N(C)C)[C@H]3O)O2)c(=O)[nH]c1=O	C11911	R06427
M00798	1	1	Cc1cn([C@H]2C[C@H](O)[C@@H](COP(=O)(O)OP(=O)(O)O[C@H]3O[C@H](C)C(=O)[C@H](O)[C@H]3O)O2)c(=O)[nH]c1=O	C11907	Cc1cn([C@H]2C[C@H](O)[C@@H](COP(=O)(O)OP(=O)(O)O[C@@H]3CC(=O)C(=O)[C@@H](C)O3)O2)c(=O)[nH]c1=O	C06620	R05518
M00798	1	2	Cc1cn([C@H]2C[C@H](O)[C@@H](COP(=O)(O)OP(=O)(O)O[C@@H]3CC(=O)C(=O)[C@@H](C)O3)O2)c(=O)[nH]c1=O	C06620	Cc1cn([C@H]2C[C@H](O)[C@@H](COP(=O)(O)OP(=O)(O)O[C@@H]3C[C@H](O)C(=O)[C@@H](C)O3)O2)c(=O)[nH]c1=O	C11928	R11051
M00798	1	3	Cc1cn([C@H]2C[C@H](O)[C@@H](COP(=O)(O)OP(=O)(O)O[C@@H]3C[C@H](O)C(=O)[C@@H](C)O3)O2)c(=O)[nH]c1=O	C11928	Cc1cn([C@H]2C[C@H](O)[C@@H](COP(=O)(O)OP(=O)(O)O[C@@H]3C[C@@](C)(O)C(=O)[C@@H](C)O3)O2)c(=O)[nH]c1=O	C18035	R08933
M00798	1	4	Cc1cn([C@H]2C[C@H](O)[C@@H](COP(=O)(O)OP(=O)(O)O[C@@H]3C[C@@](C)(O)C(=O)[C@@H](C)O3)O2)c(=O)[nH]c1=O	C18035	Cc1cn([C@H]2C[C@H](O)[C@@H](COP(=O)(O)OP(=O)(O)O[C@@H]3C[C@@](C)(O)C(=O)[C@H](C)O3)O2)c(=O)[nH]c1=O	C11915	R08934
M00798	1	5	Cc1cn([C@H]2C[C@H](O)[C@@H](COP(=O)(O)OP(=O)(O)O[C@@H]3C[C@@](C)(O)C(=O)[C@H](C)O3)O2)c(=O)[nH]c1=O	C11915	Cc1cn([C@H]2C[C@H](O)[C@@H](COP(=O)(O)OP(=O)(O)O[C@@H]3C[C@@](C)(O)[C@@H](O)[C@H](C)O3)O2)c(=O)[nH]c1=O	C11916	R06436
M00799	1	1	Cc1cn([C@H]2C[C@H](O)[C@@H](COP(=O)(O)OP(=O)(O)O[C@H]3O[C@H](C)C(=O)[C@H](O)[C@H]3O)O2)c(=O)[nH]c1=O	C11907	Cc1cn([C@H]2C[C@H](O)[C@@H](COP(=O)(O)OP(=O)(O)O[C@@H]3CC(=O)C(=O)[C@@H](C)O3)O2)c(=O)[nH]c1=O	C06620	R05518
M00799	1	2	Cc1cn([C@H]2C[C@H](O)[C@@H](COP(=O)(O)OP(=O)(O)O[C@@H]3CC(=O)C(=O)[C@@H](C)O3)O2)c(=O)[nH]c1=O	C06620	Cc1cn([C@H]2C[C@H](O)[C@@H](COP(=O)(O)OP(=O)(O)O[C@@H]3C[C@H](O)C(=O)[C@@H](C)O3)O2)c(=O)[nH]c1=O	C11928	R11051
M00799	1	3	Cc1cn([C@H]2C[C@H](O)[C@@H](COP(=O)(O)OP(=O)(O)O[C@@H]3C[C@H](O)C(=O)[C@@H](C)O3)O2)c(=O)[nH]c1=O	C11928	Cc1cn([C@H]2C[C@H](O)[C@@H](COP(=O)(O)OP(=O)(O)O[C@@H]3C[C@H](O)C(=O)[C@H](C)O3)O2)c(=O)[nH]c1=O	C11927	R06433
M00799	1	4	Cc1cn([C@H]2C[C@H](O)[C@@H](COP(=O)(O)OP(=O)(O)O[C@@H]3C[C@H](O)C(=O)[C@H](C)O3)O2)c(=O)[nH]c1=O	C11927	CO[C@H]1C[C@@H](OP(=O)(O)OP(=O)(O)OC[C@H]2O[C@@H](n3cc(C)c(=O)[nH]c3=O)C[C@@H]2O)O[C@@H](C)C1=O	C21071	R11041
M00799	1	5	CO[C@H]1C[C@@H](OP(=O)(O)OP(=O)(O)OC[C@H]2O[C@@H](n3cc(C)c(=O)[nH]c3=O)C[C@@H]2O)O[C@@H](C)C1=O	C21071	CO[C@H]1C[C@@H](OP(=O)(O)OP(=O)(O)OC[C@H]2O[C@@H](n3cc(C)c(=O)[nH]c3=O)C[C@@H]2O)O[C@@H](C)[C@@H]1O	C11921	R11042
M00800	1	1	Cc1cn([C@H]2C[C@H](O)[C@@H](COP(=O)(O)OP(=O)(O)O[C@H]3O[C@H](C)C(=O)[C@H](O)[C@H]3O)O2)c(=O)[nH]c1=O	C11907	Cc1cn([C@H]2C[C@H](O)[C@@H](COP(=O)(O)OP(=O)(O)O[C@@H]3CC(=O)C(=O)[C@@H](C)O3)O2)c(=O)[nH]c1=O	C06620	R05518
M00800	1	2	Cc1cn([C@H]2C[C@H](O)[C@@H](COP(=O)(O)OP(=O)(O)O[C@@H]3CC(=O)C(=O)[C@@H](C)O3)O2)c(=O)[nH]c1=O	C06620	Cc1cn([C@H]2C[C@H](O)[C@@H](COP(=O)(O)OP(=O)(O)O[C@@H]3C[C@@H](N)C(=O)[C@@H](C)O3)O2)c(=O)[nH]c1=O	C12318	R06631
M00800	1	3	Cc1cn([C@H]2C[C@H](O)[C@@H](COP(=O)(O)OP(=O)(O)O[C@@H]3C[C@@H](N)C(=O)[C@@H](C)O3)O2)c(=O)[nH]c1=O	C12318	Cc1cn([C@H]2C[C@H](O)[C@@H](COP(=O)(O)OP(=O)(O)O[C@@H]3C[C@@H](N(C)C)C(=O)[C@@H](C)O3)O2)c(=O)[nH]c1=O	C21073	R11045
M00800	1	4	Cc1cn([C@H]2C[C@H](O)[C@@H](COP(=O)(O)OP(=O)(O)O[C@@H]3C[C@@H](N(C)C)C(=O)[C@@H](C)O3)O2)c(=O)[nH]c1=O	C21073	Cc1cn([C@H]2C[C@H](O)[C@@H](COP(=O)(O)OP(=O)(O)O[C@@H]3C[C@@H](N(C)C)C(=O)[C@H](C)O3)O2)c(=O)[nH]c1=O	C21074	R11046
M00800	1	5	Cc1cn([C@H]2C[C@H](O)[C@@H](COP(=O)(O)OP(=O)(O)O[C@@H]3C[C@@H](N(C)C)C(=O)[C@H](C)O3)O2)c(=O)[nH]c1=O	C21074	Cc1cn([C@H]2C[C@H](O)[C@@H](COP(=O)(O)OP(=O)(O)O[C@@H]3C[C@@H](N(C)C)[C@@H](O)[C@H](C)O3)O2)c(=O)[nH]c1=O	C11919	R11047
M00801	1	1	Cc1cn([C@H]2C[C@H](O)[C@@H](COP(=O)(O)OP(=O)(O)O[C@H]3O[C@H](C)C(=O)[C@H](O)[C@H]3O)O2)c(=O)[nH]c1=O	C11907	Cc1cn([C@H]2C[C@H](O)[C@@H](COP(=O)(O)OP(=O)(O)O[C@@H]3CC(=O)C(=O)[C@@H](C)O3)O2)c(=O)[nH]c1=O	C06620	R05518
M00801	1	2	Cc1cn([C@H]2C[C@H](O)[C@@H](COP(=O)(O)OP(=O)(O)O[C@@H]3CC(=O)C(=O)[C@@H](C)O3)O2)c(=O)[nH]c1=O	C06620	Cc1cn([C@H]2C[C@H](O)[C@@H](COP(=O)(O)OP(=O)(O)O[C@@H]3C[C@@H](O)C(=O)[C@@H](C)O3)O2)c(=O)[nH]c1=O	C11922	R05526
M00801	1	3	Cc1cn([C@H]2C[C@H](O)[C@@H](COP(=O)(O)OP(=O)(O)O[C@@H]3C[C@@H](O)C(=O)[C@@H](C)O3)O2)c(=O)[nH]c1=O	C11922	Cc1cn([C@H]2C[C@H](O)[C@@H](COP(=O)(O)OP(=O)(O)O[C@@H]3C[C@H](O)C(=O)[C@H](C)O3)O2)c(=O)[nH]c1=O	C11927	R08597
M00801	1	4	Cc1cn([C@H]2C[C@H](O)[C@@H](COP(=O)(O)OP(=O)(O)O[C@@H]3C[C@H](O)C(=O)[C@H](C)O3)O2)c(=O)[nH]c1=O	C11927	Cc1cn([C@H]2C[C@H](O)[C@@H](COP(=O)(O)OP(=O)(O)O[C@@H]3C[C@H](O)[C@@H](O)[C@H](C)O3)O2)c(=O)[nH]c1=O	C11920	R06434
M00802	1	1	Cc1cn([C@H]2C[C@H](O)[C@@H](COP(=O)(O)OP(=O)(O)O[C@H]3O[C@H](C)C(=O)[C@H](O)[C@H]3O)O2)c(=O)[nH]c1=O	C11907	Cc1cn([C@H]2C[C@H](O)[C@@H](COP(=O)(O)OP(=O)(O)O[C@@H]3CC(=O)C(=O)[C@@H](C)O3)O2)c(=O)[nH]c1=O	C06620	R05518
M00802	1	2	Cc1cn([C@H]2C[C@H](O)[C@@H](COP(=O)(O)OP(=O)(O)O[C@@H]3CC(=O)C(=O)[C@@H](C)O3)O2)c(=O)[nH]c1=O	C06620	Cc1cn([C@H]2C[C@H](O)[C@@H](COP(=O)(O)OP(=O)(O)O[C@@H]3C[C@@H](O)C(=O)[C@@H](C)O3)O2)c(=O)[nH]c1=O	C11922	R05526
M00802	1	3	Cc1cn([C@H]2C[C@H](O)[C@@H](COP(=O)(O)OP(=O)(O)O[C@@H]3C[C@@H](O)C(=O)[C@@H](C)O3)O2)c(=O)[nH]c1=O	C11922	Cc1cn([C@H]2C[C@H](O)[C@@H](COP(=O)(O)OP(=O)(O)O[C@@H]3CCC(=O)[C@@H](C)O3)O2)c(=O)[nH]c1=O	C18032	R08930
M00802	1	4	Cc1cn([C@H]2C[C@H](O)[C@@H](COP(=O)(O)OP(=O)(O)O[C@@H]3CCC(=O)[C@@H](C)O3)O2)c(=O)[nH]c1=O	C18032	Cc1cn([C@H]2C[C@H](O)[C@@H](COP(=O)(O)OP(=O)(O)O[C@@H]3CC[C@H](N)[C@@H](C)O3)O2)c(=O)[nH]c1=O	C18033	R08931
M00802	1	5	Cc1cn([C@H]2C[C@H](O)[C@@H](COP(=O)(O)OP(=O)(O)O[C@@H]3CC[C@H](N)[C@@H](C)O3)O2)c(=O)[nH]c1=O	C18033	Cc1cn([C@H]2C[C@H](O)[C@@H](COP(=O)(O)OP(=O)(O)O[C@@H]3CC[C@H](N(C)C)[C@@H](C)O3)O2)c(=O)[nH]c1=O	C18034	R08932
M00803	1	1	Cc1cn([C@H]2C[C@H](O)[C@@H](COP(=O)(O)OP(=O)(O)O[C@H]3O[C@H](C)C(=O)[C@H](O)[C@H]3O)O2)c(=O)[nH]c1=O	C11907	Cc1cn([C@H]2C[C@H](O)[C@@H](COP(=O)(O)OP(=O)(O)O[C@@H]3CC(=O)C(=O)[C@@H](C)O3)O2)c(=O)[nH]c1=O	C06620	R05518
M00803	1	2	Cc1cn([C@H]2C[C@H](O)[C@@H](COP(=O)(O)OP(=O)(O)O[C@@H]3CC(=O)C(=O)[C@@H](C)O3)O2)c(=O)[nH]c1=O	C06620	Cc1cn([C@H]2C[C@H](O)[C@@H](COP(=O)(O)OP(=O)(O)O[C@@H]3CC(=O)[C@H](O)[C@@H](C)O3)O2)c(=O)[nH]c1=O	C18029	R08927
M00804	1	1	O=NO	C00088	O=[N+]([O-])O	C00244	R00798
M00805	1	1	N[C@@H](Cc1c[nH]c2ccccc12)C(=O)O	C00078	N=C(Cc1c[nH]c2ccccc12)C(=O)O	C21124	R11119
M00805	2	1	O=C1NCc2c1c1c3ccccc3[nH]c1c1[nH]c3ccccc3c21	C21126	C[C@@H]1O[C@@H](n2c3ccccc3c3c4c(c5c6ccccc6[nH]c5c32)CNC4=O)C[C@@H](N)[C@H]1O	C21127	R11122
M00805	2	2	C[C@@H]1O[C@@H](n2c3ccccc3c3c4c(c5c6ccccc6[nH]c5c32)CNC4=O)C[C@@H](N)[C@H]1O	C21127	C[C@]12O[C@H](C[C@@H](N)[C@H]1O)n1c3ccccc3c3c4c(c5c6ccccc6n2c5c31)CNC4=O	C21128	R11123
M00805	3	1	CN[C@@H]1C[C@H]2O[C@@](C)([C@@H]1O)n1c3ccccc3c3c4c(c5c6ccccc6n2c5c31)C(=O)NC4	C07349	CN[C@@H]1C[C@H]2O[C@@](C)([C@@H]1OC)n1c3ccccc3c3c4c(c5c6ccccc6n2c5c31)C(=O)NC4	C02079	R05757
M00808	1	1	N[C@@H](Cc1c[nH]c2ccccc12)C(=O)O	C00078	N=C(Cc1c[nH]c2ccccc12)C(=O)O	C21124	R11119
M00808	2	1	O=C(O)c1[nH]c(-c2c[nH]c3ccccc23)cc1-c1c[nH]c2ccccc12	C21131	O=C(O)c1[nH]c(-c2c[nH]c3ccc(O)cc23)cc1-c1c[nH]c2ccccc12	C21134	R11134
M00808	2	2	O=C(O)c1[nH]c(-c2c[nH]c3ccc(O)cc23)cc1-c1c[nH]c2ccccc12	C21134	O=C(O)c1[nH]c(-c2c[nH]c3ccc(O)cc23)cc1-c1c(O)[nH]c2ccccc12	C21135	R11135
M00808	2	3	O=C(O)c1[nH]c(-c2c[nH]c3ccc(O)cc23)cc1-c1c(O)[nH]c2ccccc12	C21135	O=C1NC(c2c[nH]c3ccc(O)cc23)=C/C1=C1\C(=O)Nc2ccccc21	C21136	R11136
M00810	1	1	CN1CCCC1c1cccnc1	C16150	CN1CCC[C@@H]1c1ccc(O)nc1	C03043	R07946
M00810	1	2	CN1CCC[C@@H]1c1ccc(O)nc1	C03043	CN1CCC=C1c1ccc(O)nc1	C21075	R11050
M00810	1	3	CN1CCC=C1c1ccc(O)nc1	C21075	CNCCCC(=O)c1ccc(O)nc1	C01297	R11049
M00810	1	4	CNCCCC(=O)c1ccc(O)nc1	C01297	CNCCCC(=O)c1ccc(O)nc1O	C15986	R07514
M00810	1	5	CNCCCC(=O)c1ccc(O)nc1O	C15986	CNCCCC(=O)O	C15987	R07515
M00810	2	1	CN1CCC[C@@H]1c1ccc(O)nc1	C03043	CN1CCC=C1c1ccc(O)nc1	C21075	R11050
M00810	2	2	CN1CCC=C1c1ccc(O)nc1	C21075	CNCCCC(=O)c1ccc(O)nc1	C01297	R11049
M00810	2	3	CNCCCC(=O)c1ccc(O)nc1	C01297	CNCCCC(=O)c1ccc(O)nc1O	C15986	R07514
M00810	2	4	CNCCCC(=O)c1ccc(O)nc1O	C15986	CNCCCC(=O)O	C15987	R07515
M00810	2	5	CNCCCC(=O)O	C15987	O=CCCC(=O)O	C00232	R10101
M00811	1	1	CN1CCCC1c1cccnc1	C16150	CN1CCC=C1c1cccnc1	C21154	R11175
M00811	1	2	CN1CCC=C1c1cccnc1	C21154	CNCCCC(=O)c1cccnc1	C20361	R11176
M00811	1	3	CNCCCC(=O)c1cccnc1	C20361	O=CCCC(=O)c1cccnc1	C19567	R10103
M00811	1	4	O=CCCC(=O)c1cccnc1	C19567	O=C(O)CCC(=O)c1cccnc1	C19569	R10105
M00811	1	5	O=C(O)CCC(=O)c1cccnc1	C19569	O=C(O)CCC(=O)c1ccc(O)nc1	C19631	R11179
M00811	2	1	CN1CCC=C1c1cccnc1	C21154	CNCCCC(=O)c1cccnc1	C20361	R11176
M00811	2	2	CNCCCC(=O)c1cccnc1	C20361	O=CCCC(=O)c1cccnc1	C19567	R10103
M00811	2	3	O=CCCC(=O)c1cccnc1	C19567	O=C(O)CCC(=O)c1cccnc1	C19569	R10105
M00811	2	4	O=C(O)CCC(=O)c1cccnc1	C19569	O=C(O)CCC(=O)c1ccc(O)nc1	C19631	R11179
M00811	2	5	O=C(O)CCC(=O)c1ccc(O)nc1	C19631	Oc1ccc(O)nc1	C01059	R09472
M00814	1	1	O=P(O)(O)OC[C@H]1O[C@@](O)(CO)[C@@H](O)[C@H](O)[C@@H]1O	C20956	O=C1C[C@@](O)(CO)[C@@H](O)[C@H](O)[C@@H]1O	C17691	R10937
M00814	1	2	O=C1C[C@@](O)(CO)[C@@H](O)[C@H](O)[C@@H]1O	C17691	O=C1C[C@@](O)(COP(=O)(O)O)[C@@H](O)[C@H](O)[C@@H]1O	C17692	R11185
M00814	1	3	O=C1C[C@@](O)(COP(=O)(O)O)[C@@H](O)[C@H](O)[C@@H]1O	C17692	O=C1C[C@@](O)(COP(=O)(O)O)[C@@H](O)[C@H](O)[C@H]1O	C17693	R11081
M00814	1	4	O=C1C[C@@](O)(COP(=O)(O)O)[C@@H](O)[C@H](O)[C@H]1O	C17693	O=P(O)(O)OC[C@]1(O)C[C@@H](O)[C@H](O)[C@@H](O)[C@@H]1O	C21204	R11243
M00815	1	1	O=P(O)(O)OC[C@H]1O[C@@](O)(CO)[C@@H](O)[C@H](O)[C@@H]1O	C20956	O=C1C[C@@](O)(CO)[C@@H](O)[C@H](O)[C@@H]1O	C17691	R10937
M00815	1	2	O=C1C[C@@](O)(CO)[C@@H](O)[C@H](O)[C@@H]1O	C17691	O=C1C[C@@](O)(CO)[C@@H](O)[C@H](O)[C@H]1O	C17694	R11079
M00815	1	3	O=C1C[C@@](O)(CO)[C@@H](O)[C@H](O)[C@H]1O	C17694	O=C1C=C(CO)[C@@H](O)[C@H](O)[C@H]1O	C17696	R11233
M00815	1	4	O=C1C=C(CO)[C@@H](O)[C@H](O)[C@H]1O	C17696	O=C1C=C(COP(=O)(O)O)[C@@H](O)[C@H](O)[C@H]1O	C17697	R11234
M00815	1	5	O=C1C=C(COP(=O)(O)O)[C@@H](O)[C@H](O)[C@H]1O	C17697	O=C1C[C@H](COP(=O)(O)O)[C@@H](O)[C@H](O)[C@H]1O	C21218	R11236
M00815	2	1	O=P(O)(O)OC[C@H]1C[C@H](N[C@H]2C=C(CO)[C@@H](O)[C@H](O)[C@H]2O)[C@H](O)[C@@H](O)[C@@H]1O	C21219	OCC1=C[C@H](N[C@H]2C[C@H](CO)[C@@H](O)[C@H](O)[C@H]2O)[C@H](O)[C@@H](O)[C@@H]1O	C17700	R11240
M00815	2	2	OCC1=C[C@H](N[C@H]2C[C@H](CO)[C@@H](O)[C@H](O)[C@H]2O)[C@H](O)[C@@H](O)[C@@H]1O	C17700	OCC1=C[C@H](N[C@H]2C[C@H](CO)[C@@H](O[C@@H]3O[C@H](CO)[C@@H](O)[C@H](O)[C@H]3O)[C@H](O)[C@H]2O)[C@H](O)[C@@H](O)[C@@H]1O	C12112	R11241
M00819	1	1	CC(C)=CCC/C(C)=C/CC/C(C)=C/COP(=O)(O)OP(=O)(O)O	C00448	CC1=C[C@@H]2CC(C)(C)C[C@]23[C@H]1CC[C@H]3C	C01841	R02305
M00819	1	2	CC1=C[C@@H]2CC(C)(C)C[C@]23[C@H]1CC[C@H]3C	C01841	C[C@@H]1CC[C@H]2C(C=O)=C[C@@H]3CC(C)(C)C[C@]312	C19939	R09814
M00819	2	1	C[C@@H]1CC[C@H]2C(C(=O)O)=C[C@@H]3CC(C)(C)C[C@]312	C20404	C[C@@H]1[C@H](O)C[C@H]2C(C(=O)O)=C[C@@H]3CC(C)(C)C[C@]312	C20403	R10157
M00819	2	2	C[C@@H]1[C@H](O)C[C@H]2C(C(=O)O)=C[C@@H]3CC(C)(C)C[C@]312	C20403	C[C@@H]1C(=O)C[C@H]2C(C(=O)O)=C[C@@H]3CC(C)(C)C[C@]312	C20400	R10156
M00819	2	3	C[C@@H]1C(=O)C[C@H]2C(C(=O)O)=C[C@@H]3CC(C)(C)C[C@]312	C20400	C[C@@H]1C(=O)OC[C@H]2C(C(=O)O)=C[C@@H]3CC(C)(C)C[C@]312	C20399	R10154
M00819	2	4	C[C@@H]1C(=O)OC[C@H]2C(C(=O)O)=C[C@@H]3CC(C)(C)C[C@]312	C20399	CC1(C)C[C@H]2C=C(C(=O)O)[C@@H]3COC(=O)[C@]4(CO4)[C@]23C1	C20397	R10145
M00819	2	5	CC1(C)C[C@H]2C=C(C(=O)O)[C@@H]3COC(=O)[C@]4(CO4)[C@]23C1	C20397	CC1=C[C@@]23[C@H](C=C(C(=O)O)[C@@H]2COC(=O)[C@]32CO2)[C@@H]1C	C20407	R10162
M00823	1	1	NC(=O)c1c(O)cc2cc3cc4cccc(O)c4c(O)c3c(O)c2c1O	C18295	Cc1c2cccc(O)c2c(O)c2c(O)c3c(O)c(C(N)=O)c(O)cc3cc12	C06629	R09189
M00823	1	2	Cc1c2cccc(O)c2c(O)c2c(O)c3c(O)c(C(N)=O)c(O)cc3cc12	C06629	Cc1c2cccc(O)c2c(O)c2c(O)c3c(O)c(C(N)=O)c(O)c(O)c3cc12	C06628	R05463
M00823	1	3	Cc1c2cccc(O)c2c(O)c2c(O)c3c(O)c(C(N)=O)c(O)c(O)c3cc12	C06628	Cc1c2c(c(O)c3c(O)cccc13)C(=O)[C@]1(O)C(=O)C(C(N)=O)=C(O)C(=O)[C@@H]1C2	C06627	R05462
M00823	2	1	Cc1c2c(c(O)c3c(O)cccc13)C(=O)[C@]1(O)C(=O)C(C(N)=O)=C(O)[C@@H](N)[C@@H]1C2	C06654	Cc1c2c(c(O)c3c(O)cccc13)C(=O)[C@]1(O)C(=O)C(C(N)=O)=C(O)[C@@H](N(C)C)[C@@H]1C2	C02811	R09191
M00823	2	2	Cc1c2c(c(O)c3c(O)cccc13)C(=O)[C@]1(O)C(=O)C(C(N)=O)=C(O)[C@@H](N(C)C)[C@@H]1C2	C02811	CN(C)[C@@H]1C(O)=C(C(N)=O)C(=O)[C@@]2(O)C(=O)C3=C(C[C@@H]12)[C@](C)(O)c1cccc(O)c1C3=O	C03206	R04060
M00823	2	3	CN(C)[C@@H]1C(O)=C(C(N)=O)C(=O)[C@@]2(O)C(=O)C3=C(C[C@@H]12)[C@](C)(O)c1cccc(O)c1C3=O	C03206	CN(C)[C@@H]1C(O)=C(C(N)=O)C(=O)[C@@]2(O)C(O)=C3C(=O)c4c(O)cccc4[C@@](C)(O)[C@H]3C[C@@H]12	C06570	R05459
M00823	2	4	CN(C)[C@@H]1C(O)=C(C(N)=O)C(=O)[C@@]2(O)C(O)=C3C(=O)c4c(O)cccc4[C@@](C)(O)[C@H]3C[C@@H]12	C06570	CN(C)[C@@H]1C(O)=C(C(N)=O)C(=O)[C@@]2(O)C(O)=C3C(=O)c4c(O)ccc(Cl)c4[C@@](C)(O)[C@H]3C[C@@H]12	C06571	R11478
M00826	1	1	C=C(O[C@@H]1C=C(C(=O)O)C=C[C@H]1O)C(=O)O	C00251	C=C(O[C@H]1C=CC=C(C(=O)O)[C@@H]1N)C(=O)O	C18054	R08956
M00826	1	2	C=C(O[C@H]1C=CC=C(C(=O)O)[C@@H]1N)C(=O)O	C18054	C=C(Oc1cccc(C(=O)O)c1N)C(=O)O	C19686	R09559
M00827	1	1	N[C@@H](Cc1ccc(O)cc1)C(=O)O	C00082	N[C@@H](CC(=O)O)c1ccc(O)cc1	C21308	R11366
M00828	1	1	N[C@@H](Cc1ccc(O)cc1)C(=O)O	C00082	N[C@@H](CC(=O)O)c1ccc(O)cc1	C21308	R11366
M00829	1	1	CC(C)(COP(=O)(O)OP(=O)(O)OC[C@H]1O[C@@H](n2cnc3c(N)ncnc32)[C@H](O)[C@@H]1OP(=O)(O)O)[C@@H](O)C(=O)NCCC(=O)NCCSC(=O)CC(=O)O	C00083	Cc1cccc(O)c1C(=O)O	C02657	R07253
M00829	1	2	Cc1cccc(O)c1C(=O)O	C02657	Cc1cccc(O)c1C(=O)SCCNC(=O)CCNC(=O)[C@H](O)C(C)(C)COP(=O)(O)OP(=O)(O)OC[C@H]1O[C@@H](n2cnc3c(N)ncnc32)[C@H](O)[C@@H]1OP(=O)(O)O	C21312	R11370
M00829	1	3	Cc1cccc(O)c1C(=O)SCCNC(=O)CCNC(=O)[C@H](O)C(C)(C)COP(=O)(O)OP(=O)(O)OC[C@H]1O[C@@H](n2cnc3c(N)ncnc32)[C@H](O)[C@@H]1OP(=O)(O)O	C21312	Cc1ccc(C)c(C(=O)SCCNC(=O)CCNC(=O)[C@H](O)C(C)(C)COP(=O)(O)OP(=O)(O)OC[C@H]2O[C@@H](n3cnc4c(N)ncnc43)[C@H](O)[C@@H]2OP(=O)(O)O)c1O	C21313	R11371
M00830	1	1	Cc1cccc2c(C(=O)O)c(O)ccc12	C20856	Cc1cc(O)cc2c(C(=O)O)c(O)ccc12	C20857	R10796
M00830	1	2	Cc1cc(O)cc2c(C(=O)O)c(O)ccc12	C20857	COc1cc(C)c2ccc(O)c(C(=O)O)c2c1	C20841	R10963
M00830	1	3	COc1cc(C)c2ccc(O)c(C(=O)O)c2c1	C20841	COc1cc(C)c2ccc(O)c(C(=O)SCCNC(=O)CCNC(=O)[C@H](O)C(C)(C)COP(=O)(O)OP(=O)(O)OC[C@H]3O[C@@H](n4cnc5c(N)ncnc54)[C@H](O)[C@@H]3OP(=O)(O)O)c2c1	C20842	R10771
M00831	1	1	O=C(O)c1cc2c(O)cc(O)cc2cc1O	C21320	O=C(O)c1cc2c(O)c(O)c(O)cc2cc1O	C21321	R11387
M00832	1	1	N[C@@H](Cc1ccc(O)cn1)C(=O)O	C21325	N[C@H](CC(=O)O)c1ccc(O)cn1	C21326	R11391
M00833	1	1	COC(=O)NC1=C2/C(=C\CSSSC)[C@](O)(C#C/C=C\C#C[C@@H]2O[C@@H]2O[C@H](C)[C@@H](NO[C@H]3C[C@H](O)[C@H](SC(=O)c4c(C)c(I)c(O)c(OC)c4OC)[C@@H](C)O3)[C@H](O)[C@H]2O)CC1=O	C21340	COC(=O)NC1=C2/C(=C\CSSSC)[C@](O)(C#C/C=C\C#C[C@@H]2O[C@@H]2O[C@H](C)[C@@H](NO[C@H]3C[C@H](O)[C@H](SC(=O)c4c(C)c(I)c(O[C@@H]5O[C@@H](C)[C@H](O)[C@@H](OC)[C@H]5O)c(OC)c4OC)[C@@H](C)O3)[C@H](O)[C@H]2O)CC1=O	C21342	R11423
M00835	1	1	C=C(O[C@@H]1C=C(C(=O)O)C=C[C@H]1O)C(=O)O	C00251	C=C(O[C@H]1C=CC=C(C(=O)O)[C@@H]1N)C(=O)O	C18054	R08956
M00835	1	2	C=C(O[C@H]1C=CC=C(C(=O)O)[C@@H]1N)C(=O)O	C18054	N[C@H]1C(C(=O)O)=CC=C[C@@H]1O	C19830	R11463
M00835	1	3	N[C@H]1C(C(=O)O)=CC=C[C@@H]1O	C19830	N[C@@H]1C(=O)CC=C[C@H]1C(=O)O	C19831	R09707
M00835	1	4	N[C@@H]1C(=O)CC=C[C@H]1C(=O)O	C19831	O=C(O)[C@@H]1C=CCC2(O)N[C@@H]3C(=NC12)CC=C[C@H]3C(=O)O	C21473	R11568
M00835	1	5	O=C(O)[C@@H]1C=CCC2(O)N[C@@H]3C(=NC12)CC=C[C@H]3C(=O)O	C21473	O=C(O)[C@@H]1C=CCC2=C1N=C1CC=C[C@@H](C(=O)O)[C@@H]1N2	C21408	R11569
M00835	2	1	O=C(O)[C@@H]1C=CCC2(O)N[C@@H]3C(=NC12)CC=C[C@H]3C(=O)O	C21473	O=C(O)[C@@H]1C=CCC2=C1N=C1CC=C[C@@H](C(=O)O)[C@@H]1N2	C21408	R11569
M00835	2	2	O=C(O)[C@@H]1C=CCC2=C1N=C1CC=C[C@@H](C(=O)O)[C@@H]1N2	C21408	O=C(O)[C@@H]1C=CCC2=Nc3ccccc3N[C@H]21	C21411	R11570
M00835	2	3	O=C(O)[C@@H]1C=CCC2=Nc3ccccc3N[C@H]21	C21411	O=C(O)C1=CC=CC2=Nc3ccccc3N[C@@H]12	C21412	R11491
M00835	2	4	O=C(O)C1=CC=CC2=Nc3ccccc3N[C@@H]12	C21412	O=C(O)c1cccc2c1Nc1ccccc1N2	C20981	R11576
M00835	2	5	O=C(O)c1cccc2c1Nc1ccccc1N2	C20981	COc1cc(C(O)C(CO)Oc2ccccc2OC)ccc1O	C21422	R11577
M00835	3	1	C[n+]1c2ccccc2nc2c(C(=O)O)cccc21	C21295	C[n+]1c2ccccc2nc2c([O-])cccc21	C01748	R11346
M00836	1	1	C[C@@]1(CC(=O)O)c2cc3[nH]c(cc4nc(cc5[nH]c(cc(n2)[C@H]1CCC(=O)O)[C@@](C)(CC(=O)O)[C@@H]5CCC(=O)O)C(CC(=O)O)=C4CCC(=O)O)c(CCC(=O)O)c3CC(=O)O	C05778	C[C@@]1(CC(=O)O)/C2=C/c3c(CC(=O)O)c(CCC(=O)O)c4n3[Ni]N3/C(=C\C5=N/C(=C\4)C(CCC(=O)O)=C5CC(=O)O)[C@@H](CCC(=O)O)[C@](C)(CC(=O)O)/C3=C/C(=N2)[C@H]1CCC(=O)O	C21510	R11626
M00836	1	2	C[C@@]1(CC(=O)O)/C2=C/c3c(CC(=O)O)c(CCC(=O)O)c4n3[Ni]N3/C(=C\C5=N/C(=C\4)C(CCC(=O)O)=C5CC(=O)O)[C@@H](CCC(=O)O)[C@](C)(CC(=O)O)/C3=C/C(=N2)[C@H]1CCC(=O)O	C21510	C[C@@]1(CC(N)=O)/C2=C/c3c(CC(=O)O)c(CCC(=O)O)c4n3[Ni]N3/C(=C\C5=N/C(=C\4)C(CCC(=O)O)=C5CC(=O)O)[C@@H](CCC(=O)O)[C@](C)(CC(N)=O)/C3=C/C(=N2)[C@H]1CCC(=O)O	C21511	R11627
M00836	1	3	C[C@@]1(CC(N)=O)/C2=C/c3c(CC(=O)O)c(CCC(=O)O)c4n3[Ni]N3/C(=C\C5=N/C(=C\4)C(CCC(=O)O)=C5CC(=O)O)[C@@H](CCC(=O)O)[C@](C)(CC(N)=O)/C3=C/C(=N2)[C@H]1CCC(=O)O	C21511	C[C@@]1(CC(N)=O)C2=N[C@@H](C[C@@]34N=C(/C=C5/[C@@H](CC(=O)O)[C@H](CCC(=O)O)/C(=C/C6=N[C@H](C2)[C@@H](CC(=O)O)[C@@H]6CCC(=O)O)N5[Ni+])[C@@H](CCC(=O)O)[C@]3(C)CC(=O)N4)[C@H]1CCC(=O)O	C21512	R11628
M00836	1	4	C[C@@]1(CC(N)=O)C2=N[C@@H](C[C@@]34N=C(/C=C5/[C@@H](CC(=O)O)[C@H](CCC(=O)O)/C(=C/C6=N[C@H](C2)[C@@H](CC(=O)O)[C@@H]6CCC(=O)O)N5[Ni+])[C@@H](CCC(=O)O)[C@]3(C)CC(=O)N4)[C@H]1CCC(=O)O	C21512	C[C@@]1(CC(N)=O)C2=N[C@@H](C[C@@]34N=C(/C=C5/[C@@H](CC(=O)O)[C@H](CCC(=O)O)/C(=C6\C(=O)CC[C@@H]7C6=N[C@H](C2)[C@H]7CC(=O)O)N5[Ni+])[C@@H](CCC(=O)O)[C@]3(C)CC(=O)N4)[C@H]1CCC(=O)O	C05777	R11629
M00837	1	1	OCc1[nH]c(-c2ccc[nH]2)cc1O	C21568	O=Cc1[nH]c(-c2ccc[nH]2)cc1O	C21569	R11668;R11669
M00837	1	2	O=Cc1[nH]c(-c2ccc[nH]2)cc1O	C21569	COc1cc(-c2ccc[nH]2)[nH]c1C=O	C21570	R11670
M00837	1	3	COc1cc(-c2ccc[nH]2)[nH]c1C=O	C21570	CCCCCc1cc(/C=C2/N=C(c3ccc[nH]3)C=C2OC)[nH]c1C	C21565	R11662
M00838	1	1	OCc1[nH]c(-c2ccc[nH]2)cc1O	C21568	O=Cc1[nH]c(-c2ccc[nH]2)cc1O	C21569	R11668;R11669
M00838	1	2	O=Cc1[nH]c(-c2ccc[nH]2)cc1O	C21569	COc1cc(-c2ccc[nH]2)[nH]c1C=O	C21570	R11670
M00838	1	3	COc1cc(-c2ccc[nH]2)[nH]c1C=O	C21570	CCCCCCCCCCCc1ccc(/C=C2/N=C(c3ccc[nH]3)C=C2OC)[nH]1	C12023	R11673
M00840	1	1	Nc1nc2c(ncn2[C@@H]2O[C@H](COP(=O)(O)OP(=O)(O)OP(=O)(O)O)[C@@H](O)[C@H]2O)c(=O)[nH]1	C00044	Nc1nc(N[C@@H]2O[C@H](COP(=O)(O)O)[C@@H](O)[C@H]2O)c(N)c(=O)[nH]1	C01304	R00425
M00840	1	2	Nc1nc(N[C@@H]2O[C@H](COP(=O)(O)O)[C@@H](O)[C@H]2O)c(N)c(=O)[nH]1	C01304	Nc1nc2c(c(=O)[nH]1)N=C([C@H](O)[C@H](O)COP(=O)(O)O)CN2	C05925	R11072
M00840	1	3	Nc1nc2c(c(=O)[nH]1)N=C([C@H](O)[C@H](O)COP(=O)(O)O)CN2	C05925	Nc1nc2c(c(=O)[nH]1)N=C([C@H](O)[C@H](O)CO)CN2	C04874	R04621
M00840	1	4	Nc1nc2c(c(=O)[nH]1)N=C([C@H](O)[C@H](O)CO)CN2	C04874	Nc1nc2c(c(=O)[nH]1)N=C(CO)CN2	C01300	R03504
M00840	1	5	Nc1nc2c(c(=O)[nH]1)N=C(CO)CN2	C01300	Nc1nc2c(c(=O)[nH]1)N=C(COP(=O)(O)OP(=O)(O)O)CN2	C04807	R03503
M00840	2	1	Nc1nc2c(c(=O)[nH]1)N=C([C@H](O)[C@H](O)CO)CN2	C04874	Nc1nc2c(c(=O)[nH]1)N=C(CO)CN2	C01300	R03504
M00840	2	2	Nc1nc2c(c(=O)[nH]1)N=C(CO)CN2	C01300	Nc1nc2c(c(=O)[nH]1)N=C(COP(=O)(O)OP(=O)(O)O)CN2	C04807	R03503
M00840	2	3	Nc1nc2c(c(=O)[nH]1)N=C(COP(=O)(O)OP(=O)(O)O)CN2	C04807	Nc1nc2c(c(=O)[nH]1)N=C(CNc1ccc(C(=O)O)cc1)CN2	C00921	R03067
M00840	2	4	Nc1nc2c(c(=O)[nH]1)N=C(CNc1ccc(C(=O)O)cc1)CN2	C00921	Nc1nc2c(c(=O)[nH]1)N=C(CNc1ccc(C(=O)N[C@@H](CCC(=O)O)C(=O)O)cc1)CN2	C00415	R02237
M00840	2	5	Nc1nc2c(c(=O)[nH]1)N=C(CNc1ccc(C(=O)N[C@@H](CCC(=O)O)C(=O)O)cc1)CN2	C00415	Nc1nc2c(c(=O)[nH]1)N[C@@H](CNc1ccc(C(=O)N[C@@H](CCC(=O)O)C(=O)O)cc1)CN2	C00101	R00936;R00939
M00841	1	1	Nc1nc2c(ncn2[C@@H]2O[C@H](COP(=O)(O)OP(=O)(O)OP(=O)(O)O)[C@@H](O)[C@H]2O)c(=O)[nH]1	C00044	Nc1nc(N[C@@H]2O[C@H](COP(=O)(O)OP(=O)(O)OP(=O)(O)O)[C@@H](O)[C@H]2O)c(NC=O)c(=O)[nH]1	C05922	R00428
M00841	1	2	Nc1nc(N[C@@H]2O[C@H](COP(=O)(O)OP(=O)(O)OP(=O)(O)O)[C@@H](O)[C@H]2O)c(NC=O)c(=O)[nH]1	C05922	Nc1nc(N[C@@H]2O[C@H](COP(=O)(O)OP(=O)(O)OP(=O)(O)O)[C@@H](O)[C@H]2O)c(N)c(=O)[nH]1	C05923	R05046
M00841	1	3	Nc1nc(N[C@@H]2O[C@H](COP(=O)(O)OP(=O)(O)OP(=O)(O)O)[C@@H](O)[C@H]2O)c(N)c(=O)[nH]1	C05923	Nc1nc(NCC(=O)C(O)C(O)COP(=O)(O)OP(=O)(O)OP(=O)(O)O)c(N)c(=O)[nH]1	C06148	R05048
M00841	1	4	Nc1nc(NCC(=O)C(O)C(O)COP(=O)(O)OP(=O)(O)OP(=O)(O)O)c(N)c(=O)[nH]1	C06148	Nc1nc2c(c(=O)[nH]1)N=C([C@H](O)[C@H](O)COP(=O)(O)OP(=O)(O)OP(=O)(O)O)CN2	C04895	R04639
M00841	1	5	Nc1nc2c(c(=O)[nH]1)N=C([C@H](O)[C@H](O)COP(=O)(O)OP(=O)(O)OP(=O)(O)O)CN2	C04895	Nc1nc2c(c(=O)[nH]1)N=C(CO)CN2	C01300	R11719
M00841	2	1	Nc1nc2c(c(=O)[nH]1)N=C([C@H](O)[C@H](O)COP(=O)(O)OP(=O)(O)OP(=O)(O)O)CN2	C04895	Nc1nc2c(c(=O)[nH]1)N=C(CO)CN2	C01300	R11719
M00841	2	2	Nc1nc2c(c(=O)[nH]1)N=C(CO)CN2	C01300	Nc1nc2c(c(=O)[nH]1)N=C(COP(=O)(O)OP(=O)(O)O)CN2	C04807	R03503
M00841	2	3	Nc1nc2c(c(=O)[nH]1)N=C(COP(=O)(O)OP(=O)(O)O)CN2	C04807	Nc1nc2c(c(=O)[nH]1)N=C(CNc1ccc(C(=O)O)cc1)CN2	C00921	R03067
M00841	2	4	Nc1nc2c(c(=O)[nH]1)N=C(CNc1ccc(C(=O)O)cc1)CN2	C00921	Nc1nc2c(c(=O)[nH]1)N=C(CNc1ccc(C(=O)N[C@@H](CCC(=O)O)C(=O)O)cc1)CN2	C00415	R02237
M00841	2	5	Nc1nc2c(c(=O)[nH]1)N=C(CNc1ccc(C(=O)N[C@@H](CCC(=O)O)C(=O)O)cc1)CN2	C00415	Nc1nc2c(c(=O)[nH]1)N[C@@H](CNc1ccc(C(=O)N[C@@H](CCC(=O)O)C(=O)O)cc1)CN2	C00101	R00936;R00939
M00842	1	1	Nc1nc2c(ncn2[C@@H]2O[C@H](COP(=O)(O)OP(=O)(O)OP(=O)(O)O)[C@@H](O)[C@H]2O)c(=O)[nH]1	C00044	Nc1nc(N[C@@H]2O[C@H](COP(=O)(O)OP(=O)(O)OP(=O)(O)O)[C@@H](O)[C@H]2O)c(NC=O)c(=O)[nH]1	C05922	R00428
M00842	1	2	Nc1nc(N[C@@H]2O[C@H](COP(=O)(O)OP(=O)(O)OP(=O)(O)O)[C@@H](O)[C@H]2O)c(NC=O)c(=O)[nH]1	C05922	Nc1nc(N[C@@H]2O[C@H](COP(=O)(O)OP(=O)(O)OP(=O)(O)O)[C@@H](O)[C@H]2O)c(N)c(=O)[nH]1	C05923	R05046
M00842	1	3	Nc1nc(N[C@@H]2O[C@H](COP(=O)(O)OP(=O)(O)OP(=O)(O)O)[C@@H](O)[C@H]2O)c(N)c(=O)[nH]1	C05923	Nc1nc(NCC(=O)C(O)C(O)COP(=O)(O)OP(=O)(O)OP(=O)(O)O)c(N)c(=O)[nH]1	C06148	R05048
M00842	1	4	Nc1nc(NCC(=O)C(O)C(O)COP(=O)(O)OP(=O)(O)OP(=O)(O)O)c(N)c(=O)[nH]1	C06148	Nc1nc2c(c(=O)[nH]1)N=C([C@H](O)[C@H](O)COP(=O)(O)OP(=O)(O)OP(=O)(O)O)CN2	C04895	R04639
M00842	1	5	Nc1nc2c(c(=O)[nH]1)N=C([C@H](O)[C@H](O)COP(=O)(O)OP(=O)(O)OP(=O)(O)O)CN2	C04895	CC(=O)C(=O)C1CNc2nc(N)[nH]c(=O)c2N1	C03684	R04286
M00842	2	1	Nc1nc(N[C@@H]2O[C@H](COP(=O)(O)OP(=O)(O)OP(=O)(O)O)[C@@H](O)[C@H]2O)c(NC=O)c(=O)[nH]1	C05922	Nc1nc(N[C@@H]2O[C@H](COP(=O)(O)OP(=O)(O)OP(=O)(O)O)[C@@H](O)[C@H]2O)c(N)c(=O)[nH]1	C05923	R05046
M00842	2	2	Nc1nc(N[C@@H]2O[C@H](COP(=O)(O)OP(=O)(O)OP(=O)(O)O)[C@@H](O)[C@H]2O)c(N)c(=O)[nH]1	C05923	Nc1nc(NCC(=O)C(O)C(O)COP(=O)(O)OP(=O)(O)OP(=O)(O)O)c(N)c(=O)[nH]1	C06148	R05048
M00842	2	3	Nc1nc(NCC(=O)C(O)C(O)COP(=O)(O)OP(=O)(O)OP(=O)(O)O)c(N)c(=O)[nH]1	C06148	Nc1nc2c(c(=O)[nH]1)N=C([C@H](O)[C@H](O)COP(=O)(O)OP(=O)(O)OP(=O)(O)O)CN2	C04895	R04639
M00842	2	4	Nc1nc2c(c(=O)[nH]1)N=C([C@H](O)[C@H](O)COP(=O)(O)OP(=O)(O)OP(=O)(O)O)CN2	C04895	CC(=O)C(=O)C1CNc2nc(N)[nH]c(=O)c2N1	C03684	R04286
M00842	2	5	CC(=O)C(=O)C1CNc2nc(N)[nH]c(=O)c2N1	C03684	C[C@H](O)[C@H](O)[C@H]1CNc2nc(N)[nH]c(=O)c2N1	C00272	R08208
M00843	1	1	Nc1nc2c(ncn2[C@@H]2O[C@H](COP(=O)(O)OP(=O)(O)OP(=O)(O)O)[C@@H](O)[C@H]2O)c(=O)[nH]1	C00044	Nc1nc(N[C@@H]2O[C@H](COP(=O)(O)OP(=O)(O)OP(=O)(O)O)[C@@H](O)[C@H]2O)c(NC=O)c(=O)[nH]1	C05922	R00428
M00843	1	2	Nc1nc(N[C@@H]2O[C@H](COP(=O)(O)OP(=O)(O)OP(=O)(O)O)[C@@H](O)[C@H]2O)c(NC=O)c(=O)[nH]1	C05922	Nc1nc(N[C@@H]2O[C@H](COP(=O)(O)OP(=O)(O)OP(=O)(O)O)[C@@H](O)[C@H]2O)c(N)c(=O)[nH]1	C05923	R05046
M00843	1	3	Nc1nc(N[C@@H]2O[C@H](COP(=O)(O)OP(=O)(O)OP(=O)(O)O)[C@@H](O)[C@H]2O)c(N)c(=O)[nH]1	C05923	Nc1nc(NCC(=O)C(O)C(O)COP(=O)(O)OP(=O)(O)OP(=O)(O)O)c(N)c(=O)[nH]1	C06148	R05048
M00843	1	4	Nc1nc(NCC(=O)C(O)C(O)COP(=O)(O)OP(=O)(O)OP(=O)(O)O)c(N)c(=O)[nH]1	C06148	Nc1nc2c(c(=O)[nH]1)N=C([C@H](O)[C@H](O)COP(=O)(O)OP(=O)(O)OP(=O)(O)O)CN2	C04895	R04639
M00843	1	5	Nc1nc2c(c(=O)[nH]1)N=C([C@H](O)[C@H](O)COP(=O)(O)OP(=O)(O)OP(=O)(O)O)CN2	C04895	CC(=O)C(=O)C1CNc2nc(N)[nH]c(=O)c2N1	C03684	R04286
M00843	2	1	Nc1nc(N[C@@H]2O[C@H](COP(=O)(O)OP(=O)(O)OP(=O)(O)O)[C@@H](O)[C@H]2O)c(NC=O)c(=O)[nH]1	C05922	Nc1nc(N[C@@H]2O[C@H](COP(=O)(O)OP(=O)(O)OP(=O)(O)O)[C@@H](O)[C@H]2O)c(N)c(=O)[nH]1	C05923	R05046
M00843	2	2	Nc1nc(N[C@@H]2O[C@H](COP(=O)(O)OP(=O)(O)OP(=O)(O)O)[C@@H](O)[C@H]2O)c(N)c(=O)[nH]1	C05923	Nc1nc(NCC(=O)C(O)C(O)COP(=O)(O)OP(=O)(O)OP(=O)(O)O)c(N)c(=O)[nH]1	C06148	R05048
M00843	2	3	Nc1nc(NCC(=O)C(O)C(O)COP(=O)(O)OP(=O)(O)OP(=O)(O)O)c(N)c(=O)[nH]1	C06148	Nc1nc2c(c(=O)[nH]1)N=C([C@H](O)[C@H](O)COP(=O)(O)OP(=O)(O)OP(=O)(O)O)CN2	C04895	R04639
M00843	2	4	Nc1nc2c(c(=O)[nH]1)N=C([C@H](O)[C@H](O)COP(=O)(O)OP(=O)(O)OP(=O)(O)O)CN2	C04895	CC(=O)C(=O)C1CNc2nc(N)[nH]c(=O)c2N1	C03684	R04286
M00843	2	5	CC(=O)C(=O)C1CNc2nc(N)[nH]c(=O)c2N1	C03684	C[C@H](O)[C@H](O)[C@H]1CNc2nc(N)[nH]c(=O)c2N1	C20264	R09990
M00844	1	1	NCCC[C@H](N)C(=O)O	C00077	NC(=O)NCCC[C@H](N)C(=O)O	C00327	R01398
M00844	1	2	NC(=O)NCCC[C@H](N)C(=O)O	C00327	N=C(NCCC[C@H](N)C(=O)O)N[C@@H](CC(=O)O)C(=O)O	C03406	R01954
M00844	1	3	N=C(NCCC[C@H](N)C(=O)O)N[C@@H](CC(=O)O)C(=O)O	C03406	N=C(N)NCCC[C@H](N)C(=O)O	C00062	R01086
M00845	1	1	N[C@@H](CCC(=O)O)C(=O)O	C00025	CC(=O)N[C@@H](CCC(=O)O)C(=O)O	C00624	R00259
M00845	1	2	CC(=O)N[C@@H](CCC(=O)O)C(=O)O	C00624	CC(=O)N[C@@H](CCC(=O)OP(=O)(O)O)C(=O)O	C04133	R02649
M00845	1	3	CC(=O)N[C@@H](CCC(=O)OP(=O)(O)O)C(=O)O	C04133	CC(=O)N[C@@H](CCC=O)C(=O)O	C01250	R03443
M00845	1	4	CC(=O)N[C@@H](CCC=O)C(=O)O	C01250	CC(=O)N[C@@H](CCCN)C(=O)O	C00437	R02283
M00845	1	5	CC(=O)N[C@@H](CCCN)C(=O)O	C00437	CC(=O)N[C@@H](CCCNC(N)=O)C(=O)O	C15532	R07245
M00845	2	1	CC(=O)N[C@@H](CCC=O)C(=O)O	C01250	CC(=O)N[C@@H](CCCN)C(=O)O	C00437	R02283
M00845	2	2	CC(=O)N[C@@H](CCCN)C(=O)O	C00437	CC(=O)N[C@@H](CCCNC(N)=O)C(=O)O	C15532	R07245
M00845	2	3	CC(=O)N[C@@H](CCCNC(N)=O)C(=O)O	C15532	NC(=O)NCCC[C@H](N)C(=O)O	C00327	R09107
M00845	2	4	NC(=O)NCCC[C@H](N)C(=O)O	C00327	N=C(NCCC[C@H](N)C(=O)O)N[C@@H](CC(=O)O)C(=O)O	C03406	R01954
M00845	2	5	N=C(NCCC[C@H](N)C(=O)O)N[C@@H](CC(=O)O)C(=O)O	C03406	O=C(O)/C=C/C(=O)O	C00122	R01086
M00846	1	1	N[C@H](C=O)CCC(=O)O	C03741	NCC(=O)CCC(=O)O	C00430	R02272
M00846	1	2	NCC(=O)CCC(=O)O	C00430	NCc1[nH]cc(CCC(=O)O)c1CC(=O)O	C00931	R00036
M00846	1	3	NCc1[nH]cc(CCC(=O)O)c1CC(=O)O	C00931	O=C(O)CCc1c[nH]c(Cc2[nH]c(Cc3[nH]c(Cc4[nH]c(CO)c(CC(=O)O)c4CCC(=O)O)c(CC(=O)O)c3CCC(=O)O)c(CC(=O)O)c2CCC(=O)O)c1CC(=O)O	C01024	R00084
M00846	1	4	O=C(O)CCc1c[nH]c(Cc2[nH]c(Cc3[nH]c(Cc4[nH]c(CO)c(CC(=O)O)c4CCC(=O)O)c(CC(=O)O)c3CCC(=O)O)c(CC(=O)O)c2CCC(=O)O)c1CC(=O)O	C01024	O=C(O)CCc1c2[nH]c(c1CC(=O)O)Cc1[nH]c(c(CC(=O)O)c1CCC(=O)O)Cc1[nH]c(c(CC(=O)O)c1CCC(=O)O)Cc1[nH]c(c(CCC(=O)O)c1CC(=O)O)C2	C01051	R03165
M00846	1	5	O=C(O)CCc1c2[nH]c(c1CC(=O)O)Cc1[nH]c(c(CC(=O)O)c1CCC(=O)O)Cc1[nH]c(c(CC(=O)O)c1CCC(=O)O)Cc1[nH]c(c(CCC(=O)O)c1CC(=O)O)C2	C01051	C[C@@]1(CC(=O)O)C2=N/C(=C\c3[nH]c(c(CCC(=O)O)c3CC(=O)O)Cc3[nH]c(c(CC(=O)O)c3CCC(=O)O)/C=C3\N/C(=C\2)[C@@H](CCC(=O)O)[C@]3(C)CC(=O)O)[C@H]1CCC(=O)O	C02463	R03194
M00846	2	1	NCc1[nH]cc(CCC(=O)O)c1CC(=O)O	C00931	O=C(O)CCc1c[nH]c(Cc2[nH]c(Cc3[nH]c(Cc4[nH]c(CO)c(CC(=O)O)c4CCC(=O)O)c(CC(=O)O)c3CCC(=O)O)c(CC(=O)O)c2CCC(=O)O)c1CC(=O)O	C01024	R00084
M00846	2	2	O=C(O)CCc1c[nH]c(Cc2[nH]c(Cc3[nH]c(Cc4[nH]c(CO)c(CC(=O)O)c4CCC(=O)O)c(CC(=O)O)c3CCC(=O)O)c(CC(=O)O)c2CCC(=O)O)c1CC(=O)O	C01024	O=C(O)CCc1c2[nH]c(c1CC(=O)O)Cc1[nH]c(c(CC(=O)O)c1CCC(=O)O)Cc1[nH]c(c(CC(=O)O)c1CCC(=O)O)Cc1[nH]c(c(CCC(=O)O)c1CC(=O)O)C2	C01051	R03165
M00846	2	3	O=C(O)CCc1c2[nH]c(c1CC(=O)O)Cc1[nH]c(c(CC(=O)O)c1CCC(=O)O)Cc1[nH]c(c(CC(=O)O)c1CCC(=O)O)Cc1[nH]c(c(CCC(=O)O)c1CC(=O)O)C2	C01051	C[C@@]1(CC(=O)O)C2=N/C(=C\c3[nH]c(c(CCC(=O)O)c3CC(=O)O)Cc3[nH]c(c(CC(=O)O)c3CCC(=O)O)/C=C3\N/C(=C\2)[C@@H](CCC(=O)O)[C@]3(C)CC(=O)O)[C@H]1CCC(=O)O	C02463	R03194
M00846	2	4	C[C@@]1(CC(=O)O)C2=N/C(=C\c3[nH]c(c(CCC(=O)O)c3CC(=O)O)Cc3[nH]c(c(CC(=O)O)c3CCC(=O)O)/C=C3\N/C(=C\2)[C@@H](CCC(=O)O)[C@]3(C)CC(=O)O)[C@H]1CCC(=O)O	C02463	C[C@@]1(CC(=O)O)c2cc3[nH]c(cc4nc(cc5[nH]c(cc(n2)[C@H]1CCC(=O)O)[C@@](C)(CC(=O)O)[C@@H]5CCC(=O)O)C(CC(=O)O)=C4CCC(=O)O)c(CCC(=O)O)c3CC(=O)O	C05778	R03947
M00846	2	5	C[C@@]1(CC(=O)O)c2cc3[nH]c(cc4nc(cc5[nH]c(cc(n2)[C@H]1CCC(=O)O)[C@@](C)(CC(=O)O)[C@@H]5CCC(=O)O)C(CC(=O)O)=C4CCC(=O)O)c(CCC(=O)O)c3CC(=O)O	C05778	C[C@@]1(CC(=O)O)/C2=C/c3c(CC(=O)O)c(CCC(=O)O)c4n3[Fe]N3/C(=C\C5=N/C(=C\4)C(CCC(=O)O)=C5CC(=O)O)[C@@H](CCC(=O)O)[C@](C)(CC(=O)O)/C3=C/C(=N2)[C@H]1CCC(=O)O	C00748	R02864
M00847	1	1	C[C@@]1(CC(=O)O)/C2=C/c3c(CC(=O)O)c(CCC(=O)O)c4n3[Fe]N3/C(=C\C5=N/C(=C\4)C(CCC(=O)O)=C5CC(=O)O)[C@@H](CCC(=O)O)[C@](C)(CC(=O)O)/C3=C/C(=N2)[C@H]1CCC(=O)O	C00748	CC1=C(CCC(=O)O)/C2=C/c3c(CCC(=O)O)c(C)c4n3[Fe]N3/C(=C\C1=N2)[C@@H](CCC(=O)O)[C@](C)(CC(=O)O)/C3=C/C1=N/C(=C\4)[C@@](C)(CC(=O)O)[C@@H]1CCC(=O)O	C21835	R12000
M00848	1	1	Nc1ccccc1C(=O)O	C00108	CC(C)(COP(=O)(O)OP(=O)(O)OC[C@H]1O[C@@H](n2cnc3c(N)ncnc32)[C@H](O)[C@@H]1OP(=O)(O)O)[C@@H](O)C(=O)NCCC(=O)NCCSC(=O)c1ccccc1N	C02247	R00982
M00848	2	1	Cc1cc(O)c2ccccc2n1	C21873	CC(C)=CCC/C(C)=C/CC/C(C)=C/Cc1c(C)[nH]c2ccccc2c1=O	C10641	R12050
M00848	2	2	CC(C)=CCC/C(C)=C/CC/C(C)=C/Cc1c(C)[nH]c2ccccc2c1=O	C10641	CC(C)=CCC/C(C)=C/CC/C(C)=C/Cc1c(C)n(O)c2ccccc2c1=O	C21330	R12051
M00848	2	3	CC(C)=CCC/C(C)=C/CC/C(C)=C/Cc1c(C)n(O)c2ccccc2c1=O	C21330	CC(C)=CCC/C(C)=C/CC/C(C)=C/CC1(O)C(=O)C(C)=[N+]([O-])c2ccccc21	C21141	R11382;R11383
M00848	2	4	CC(C)=CCC/C(C)=C/CC/C(C)=C/CC1(O)C(=O)C(C)=[N+]([O-])c2ccccc21	C21141	CC(C)=CCC/C(C)=C/CC/C(C)=C/Cc1c(O)c(C)[n+]([O-])c2ccccc12	C21140	R11149
M00848	2	5	CC(C)=CCC/C(C)=C/CC/C(C)=C/Cc1c(O)c(C)[n+]([O-])c2ccccc12	C21140	CC(C)=CCC/C(C)=C/CCC1(C)OC1Cc1c(O)c(C)[n+]([O-])c2ccccc12	C21874	R12052;R12053
M00848	3	1	CC(C)=CCC/C(C)=C/CC/C(C)=C/Cc1c(C)[nH]c2ccccc2c1=O	C10641	CC(C)=CCC/C(C)=C/CC/C(C)=C/Cc1c(C)n(O)c2ccccc2c1=O	C21330	R12051
M00848	3	2	CC(C)=CCC/C(C)=C/CC/C(C)=C/Cc1c(C)n(O)c2ccccc2c1=O	C21330	CC(C)=CCC/C(C)=C/CC/C(C)=C/CC1(O)C(=O)C(C)=[N+]([O-])c2ccccc21	C21141	R11382;R11383
M00848	3	3	CC(C)=CCC/C(C)=C/CC/C(C)=C/CC1(O)C(=O)C(C)=[N+]([O-])c2ccccc21	C21141	CC(C)=CCC/C(C)=C/CC/C(C)=C/Cc1c(O)c(C)[n+]([O-])c2ccccc12	C21140	R11149
M00848	3	4	CC(C)=CCC/C(C)=C/CC/C(C)=C/Cc1c(O)c(C)[n+]([O-])c2ccccc12	C21140	CC(C)=CCC/C(C)=C/CCC1(C)OC1Cc1c(O)c(C)[n+]([O-])c2ccccc12	C21874	R12052;R12053
M00848	3	5	CC(C)=CCC/C(C)=C/CCC1(C)OC1Cc1c(O)c(C)[n+]([O-])c2ccccc12	C21874	CC(C)=CCC/C(C)=C/CC[C@@](C)(O)[C@@H]1Cc2c(c(C)[n+]([O-])c3ccccc23)O1	C21875	R12054
M00849	1	1	CC(=O)SCCNC(=O)CCNC(=O)[C@H](O)C(C)(C)COP(=O)(O)OP(=O)(O)OC[C@H]1O[C@@H](n2cnc3c(N)ncnc32)[C@H](O)[C@@H]1OP(=O)(O)O	C00024	CC(=O)CC(=O)SCCNC(=O)CCNC(=O)[C@H](O)C(C)(C)COP(=O)(O)OP(=O)(O)OC[C@H]1O[C@@H](n2cnc3c(N)ncnc32)[C@H](O)[C@@H]1OP(=O)(O)O	C00332	R00238
M00849	1	2	CC(=O)CC(=O)SCCNC(=O)CCNC(=O)[C@H](O)C(C)(C)COP(=O)(O)OP(=O)(O)OC[C@H]1O[C@@H](n2cnc3c(N)ncnc32)[C@H](O)[C@@H]1OP(=O)(O)O	C00332	CC(C)(COP(=O)(O)OP(=O)(O)OC[C@H]1O[C@@H](n2cnc3c(N)ncnc32)[C@H](O)[C@@H]1OP(=O)(O)O)[C@@H](O)C(=O)NCCC(=O)NCCSC(=O)C[C@@](C)(O)CC(=O)O	C00356	R01978
M00849	1	3	CC(C)(COP(=O)(O)OP(=O)(O)OC[C@H]1O[C@@H](n2cnc3c(N)ncnc32)[C@H](O)[C@@H]1OP(=O)(O)O)[C@@H](O)C(=O)NCCC(=O)NCCSC(=O)C[C@@](C)(O)CC(=O)O	C00356	C[C@@](O)(CCO)CC(=O)O	C00418	R02081;R02082
M00849	1	4	C[C@@](O)(CCO)CC(=O)O	C00418	C[C@@](CCO)(CC(=O)O)OP(=O)(O)O	C20847	R10779
M00849	1	5	C[C@@](CCO)(CC(=O)O)OP(=O)(O)O	C20847	C[C@@](CCOP(=O)(O)O)(CC(=O)O)OP(=O)(O)O	C20848	R10780
M00849	2	1	C[C@@](O)(CCO)CC(=O)O	C00418	C[C@@](CCO)(CC(=O)O)OP(=O)(O)O	C20847	R10779
M00849	2	2	C[C@@](CCO)(CC(=O)O)OP(=O)(O)O	C20847	C[C@@](CCOP(=O)(O)O)(CC(=O)O)OP(=O)(O)O	C20848	R10780
M00849	2	3	C[C@@](CCOP(=O)(O)O)(CC(=O)O)OP(=O)(O)O	C20848	C=C(C)CCOP(=O)(O)O	C20345	R10781
M00849	2	4	C=C(C)CCOP(=O)(O)O	C20345	C=C(C)CCOP(=O)(O)OP(=O)(O)O	C00129	R10093
M00849	2	5	C=C(C)CCOP(=O)(O)OP(=O)(O)O	C00129	CC(C)=CCOP(=O)(O)OP(=O)(O)O	C00235	R01123
M00854	1	1	O=P(O)(O)O[C@H]1O[C@H](CO)[C@@H](O)[C@H](O)[C@H]1O	C00103	O=c1ccn([C@@H]2O[C@H](COP(=O)(O)OP(=O)(O)O[C@H]3O[C@H](CO)[C@@H](O)[C@H](O)[C@H]3O)[C@@H](O)[C@H]2O)c(=O)[nH]1	C00029	R00289
M00855	1	1	O=P(O)(O)O[C@H]1O[C@H](CO)[C@@H](O)[C@H](O)[C@H]1O	C00103	O=P(O)(O)OC[C@H]1OC(O)[C@H](O)[C@@H](O)[C@@H]1O	C00092	R08639
